# Supplementary material
Source: publisher figshare collection journal article supplement (https://gsapubs.figshare.com/articles/dataset/_/22814567)

Electron Image 1

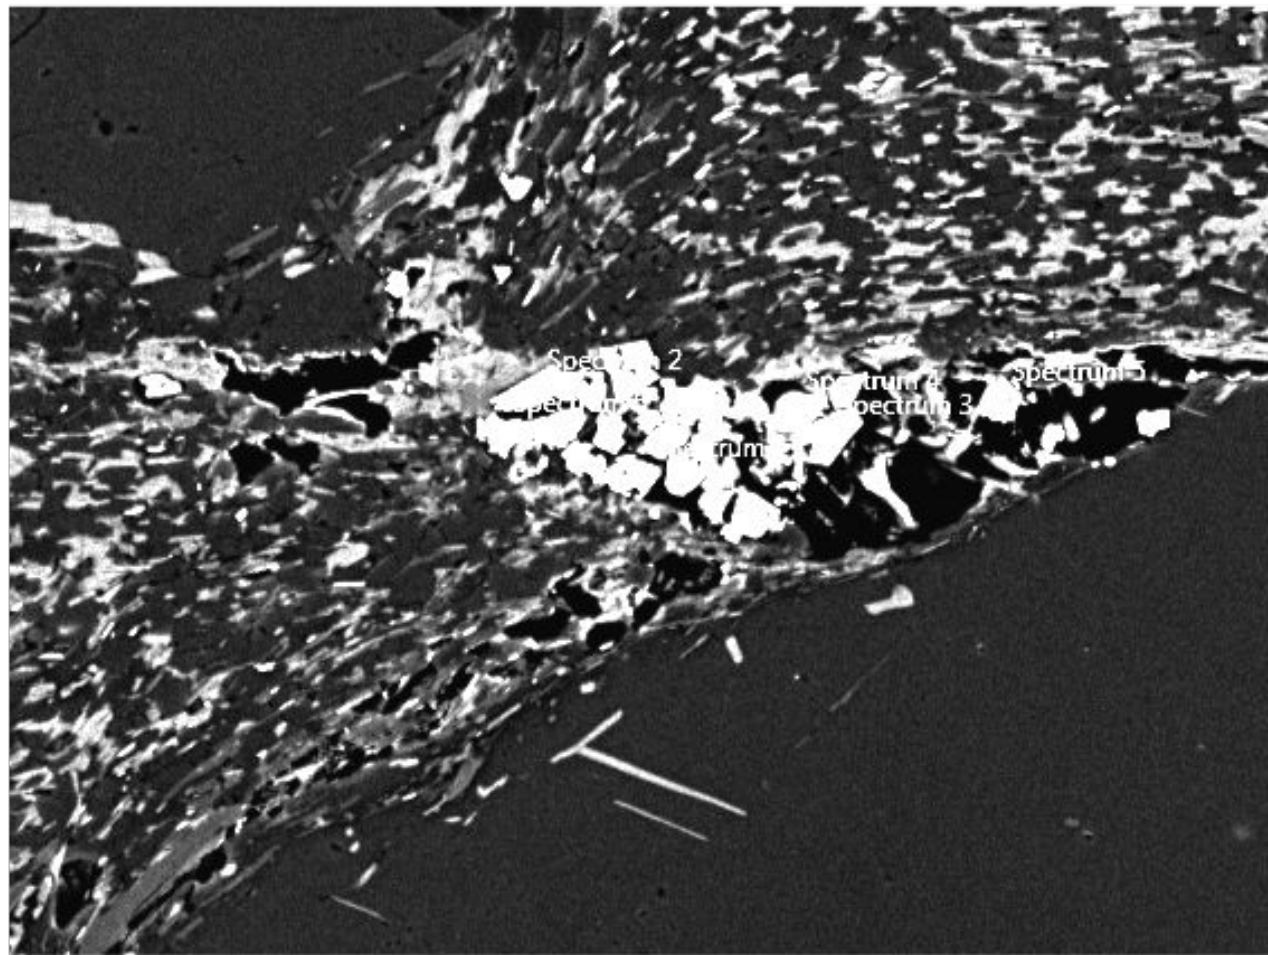

50μm

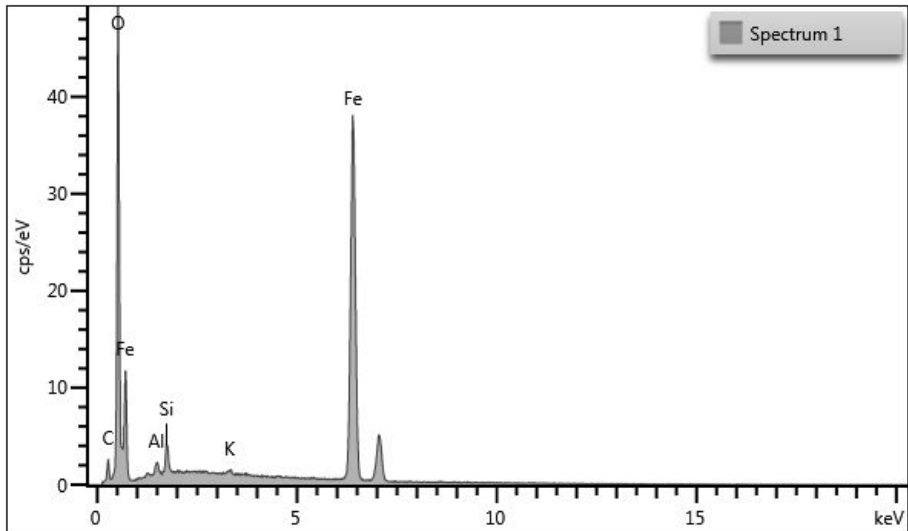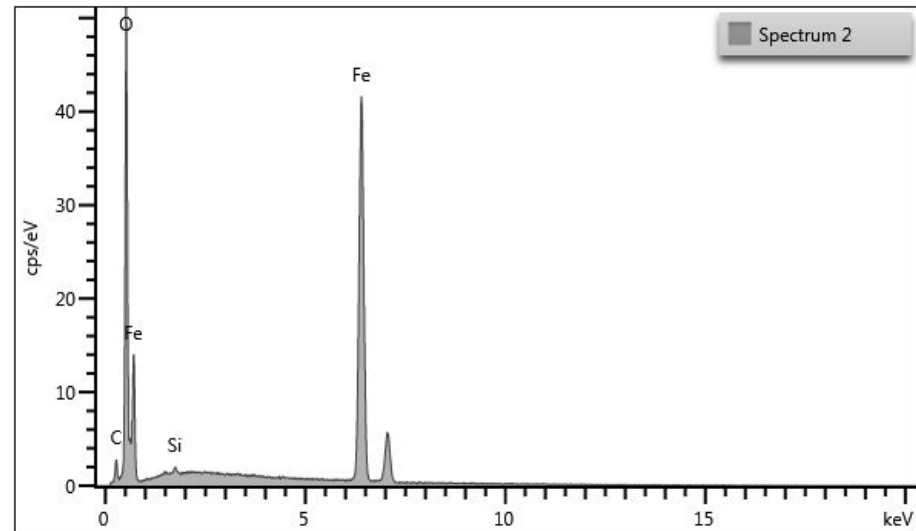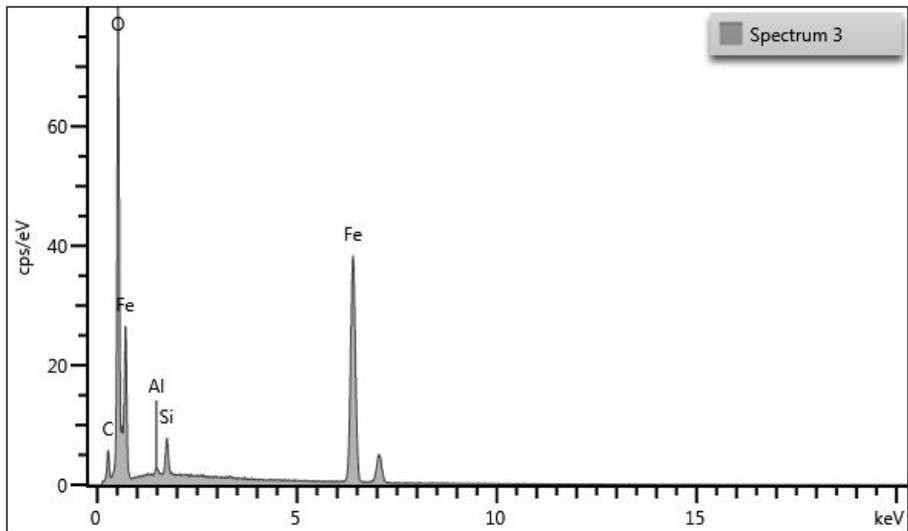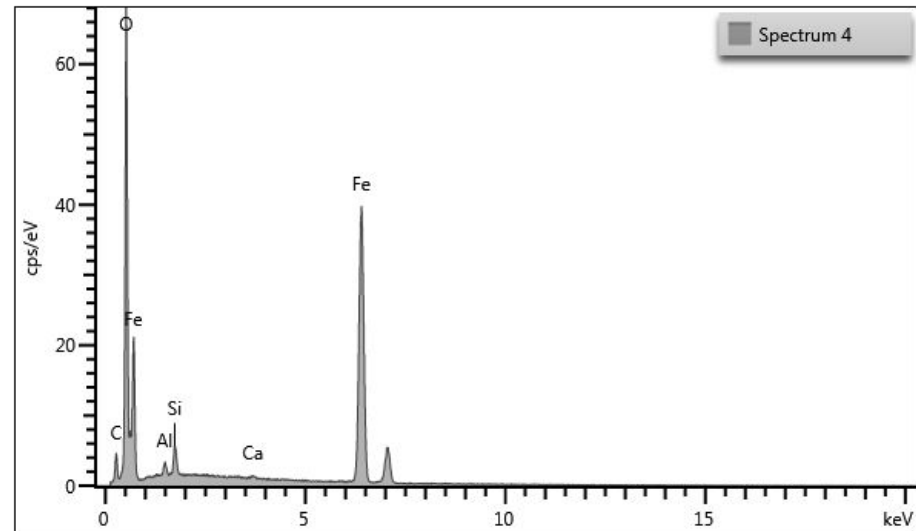

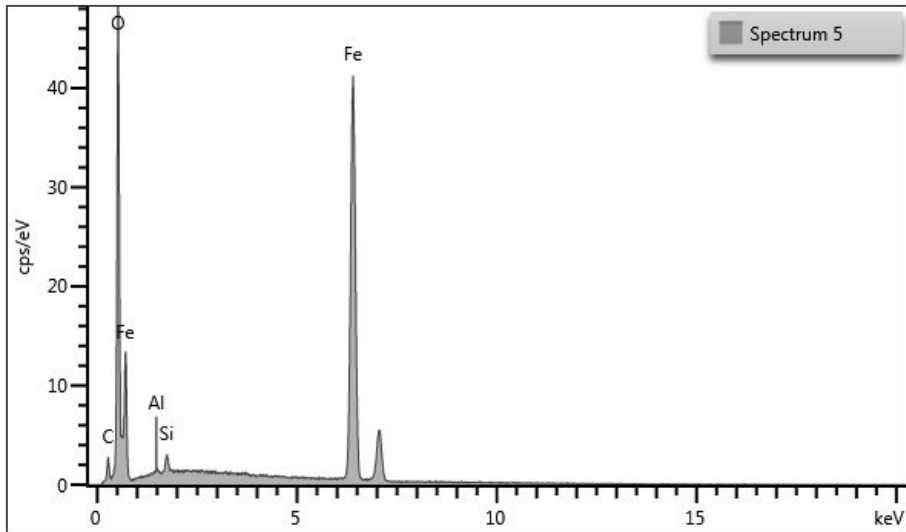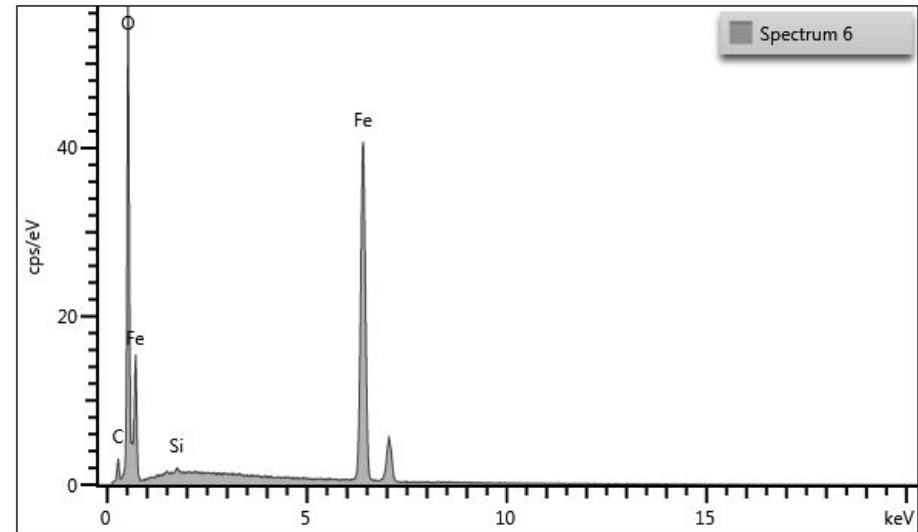

Electron Image 2

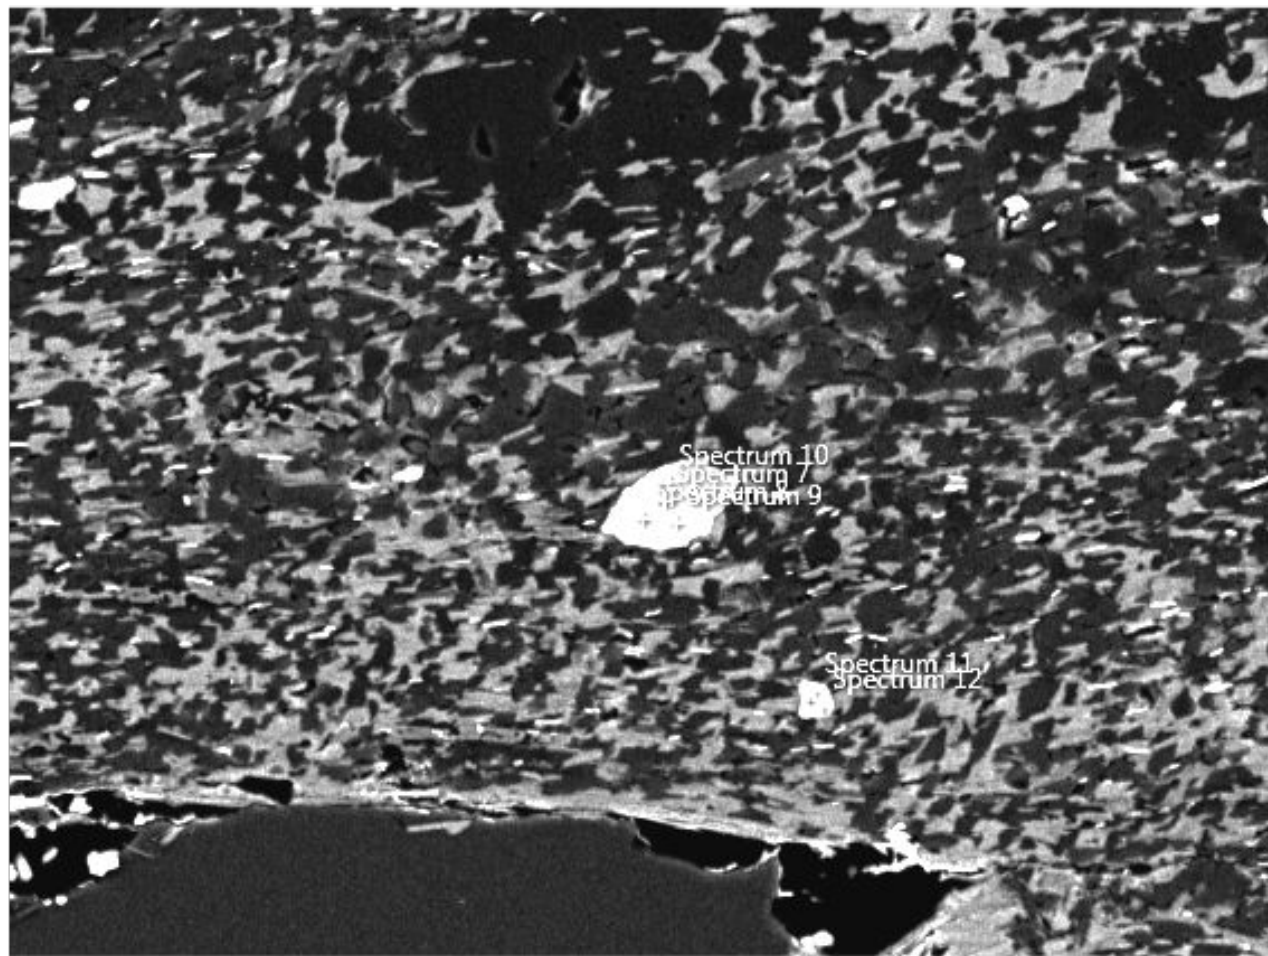

50 $\mu$ m

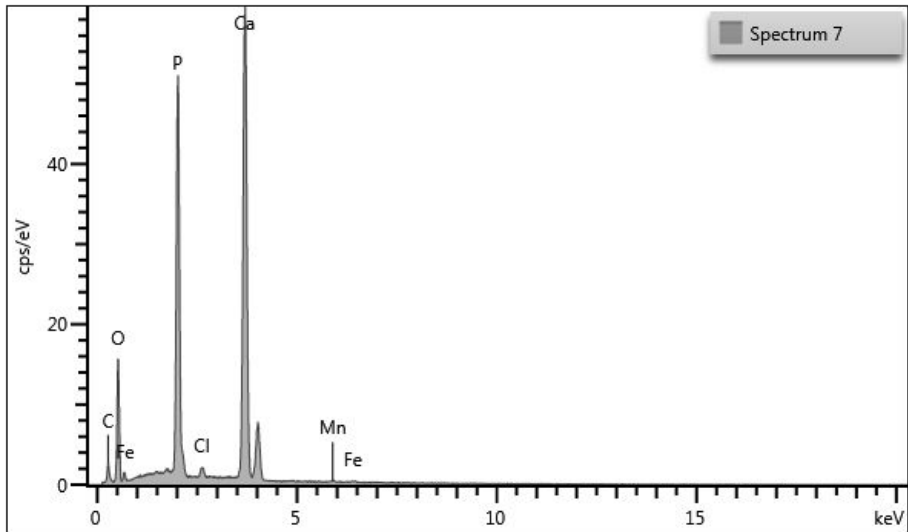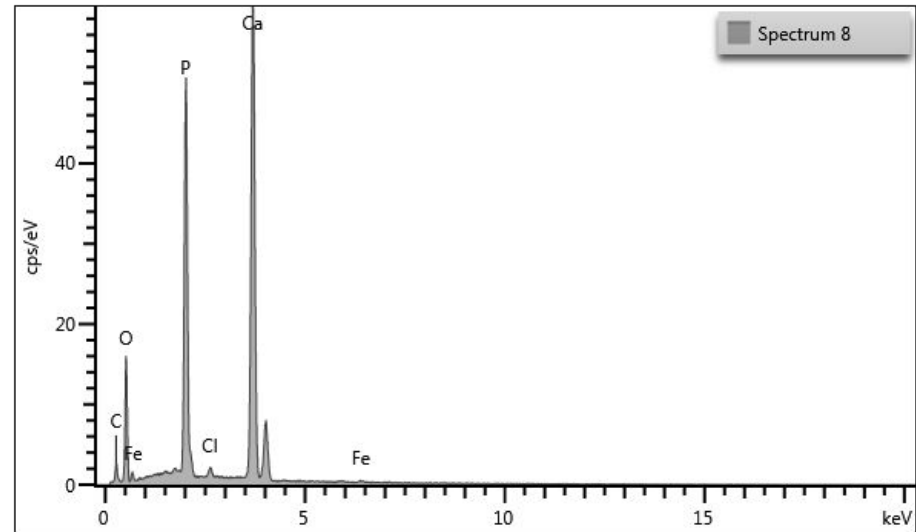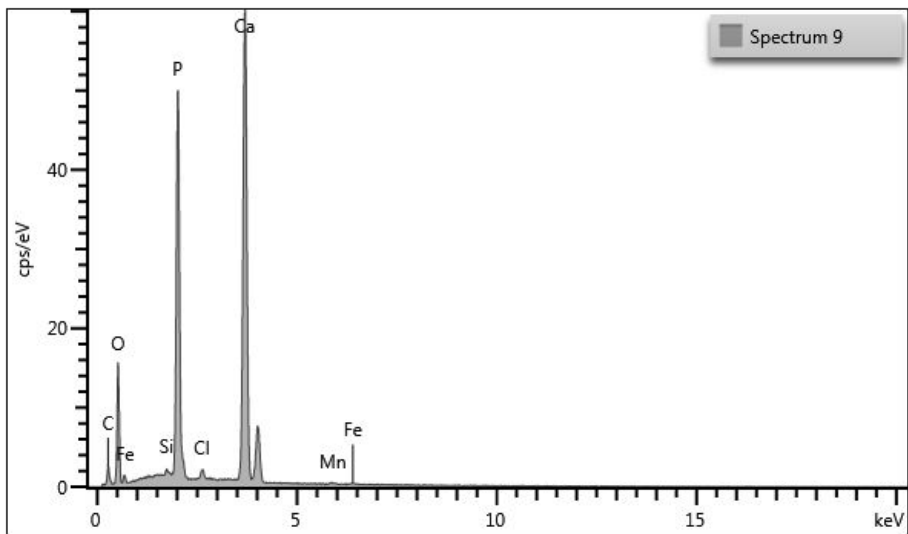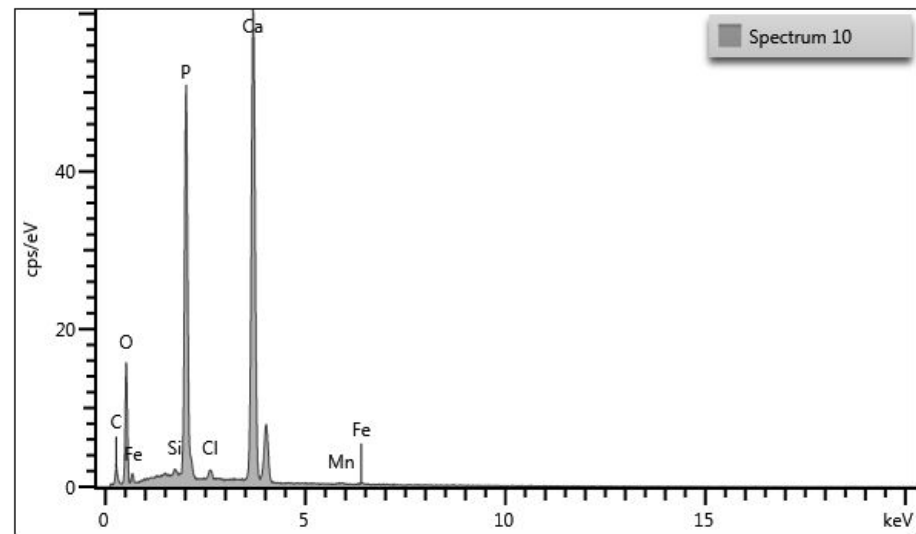

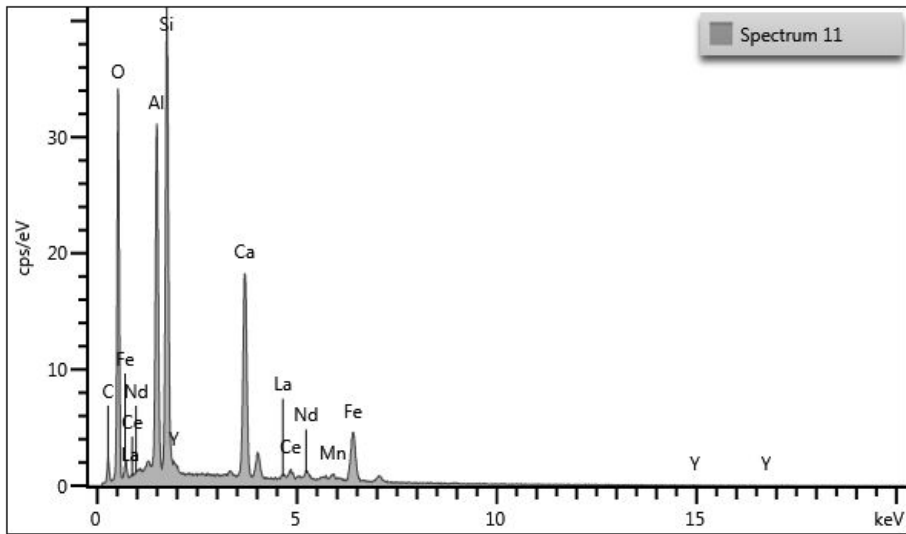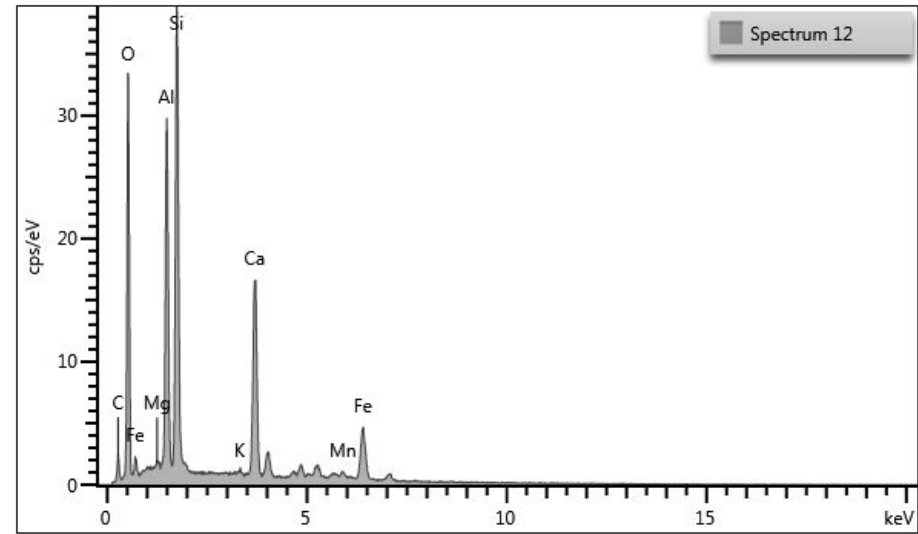

Electron Image 3

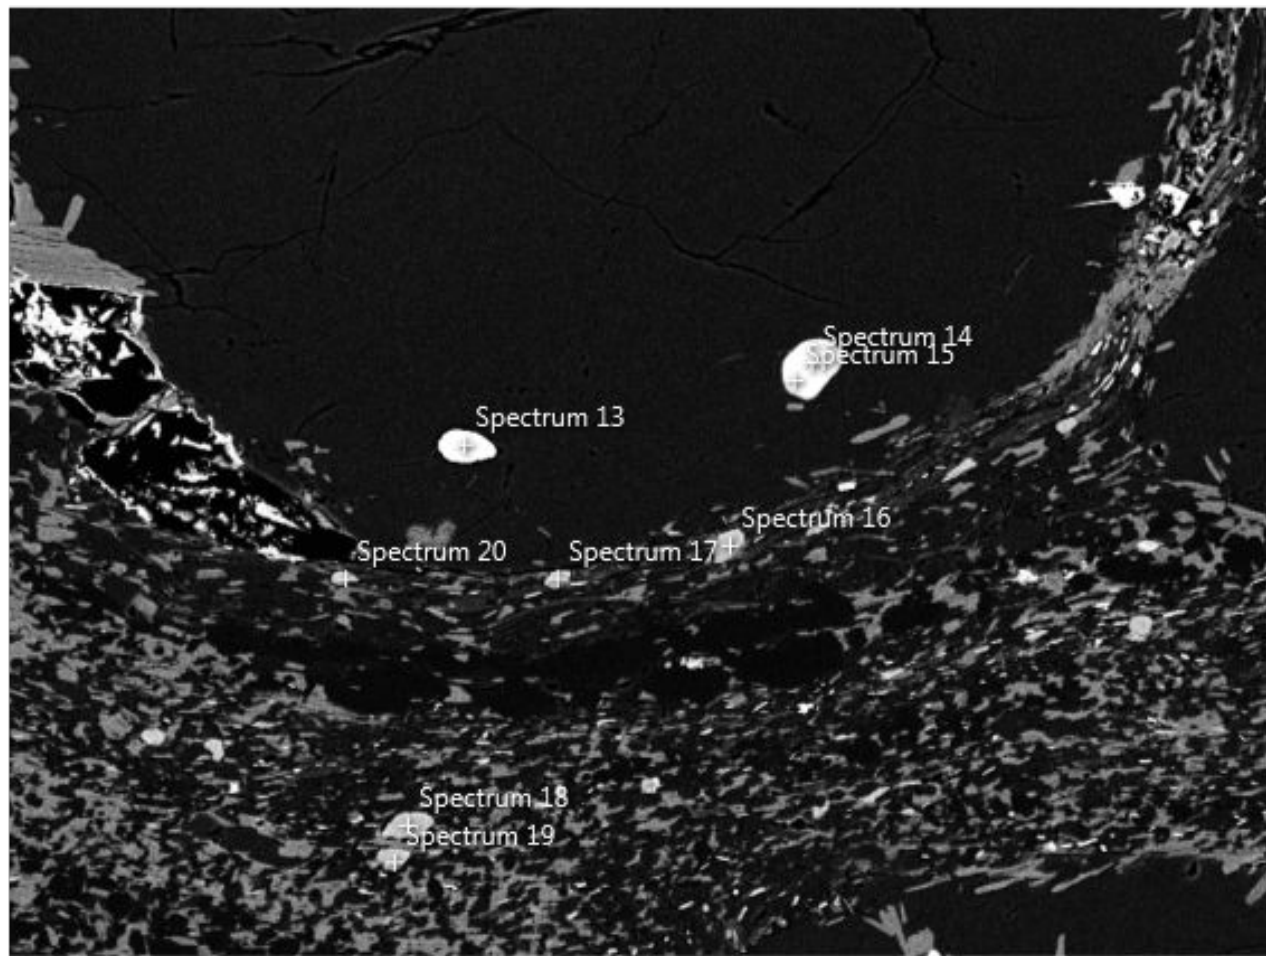

100 $\mu$ m

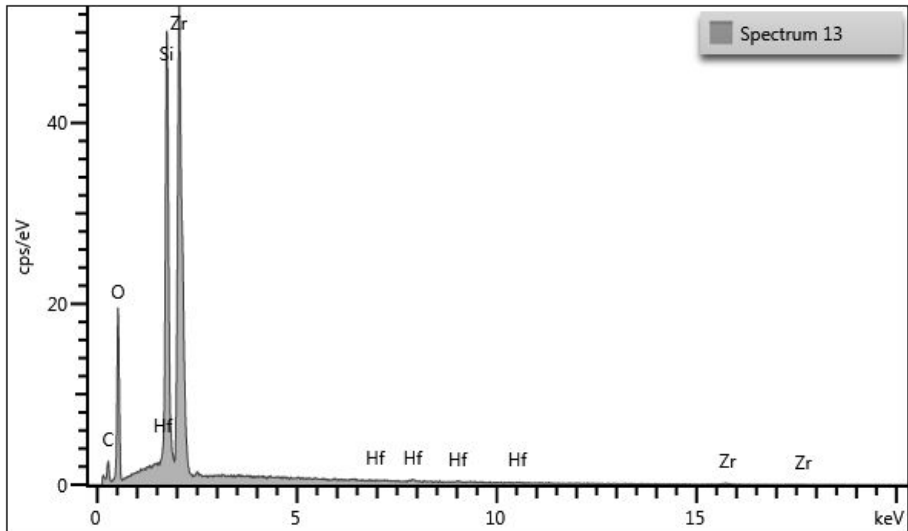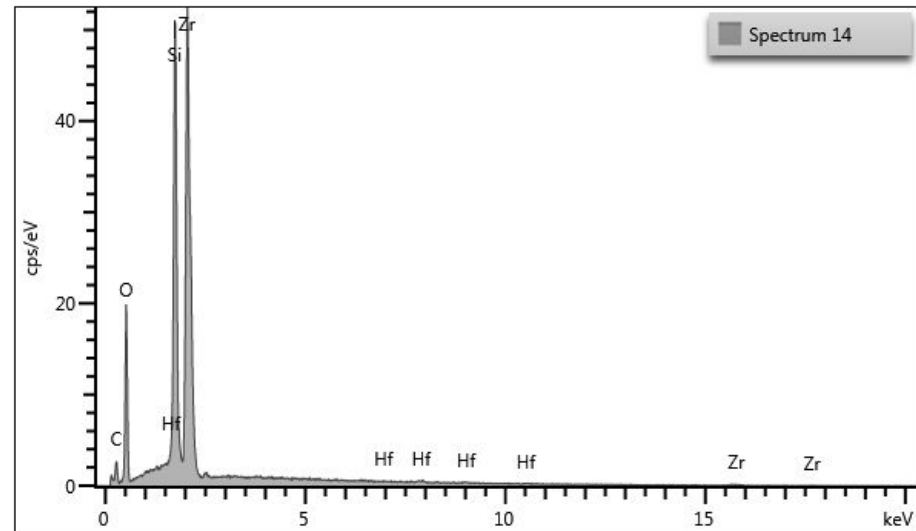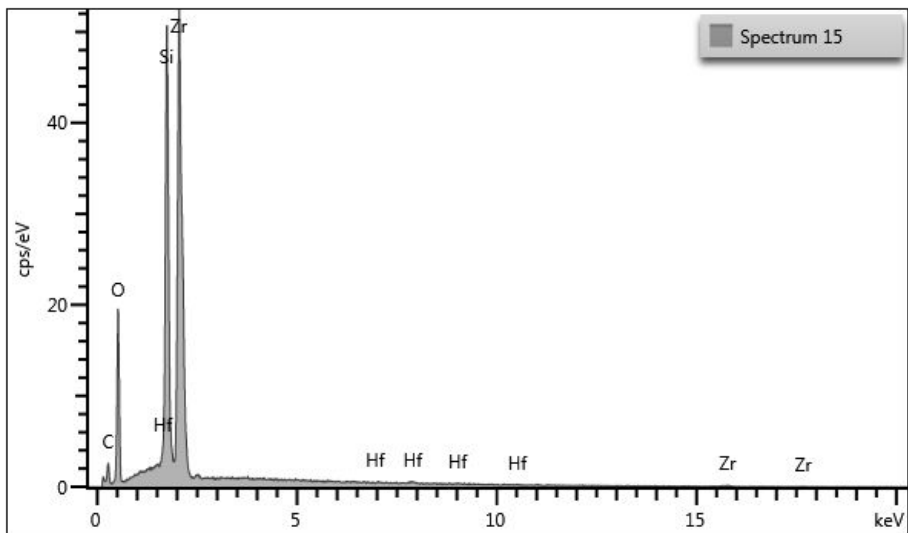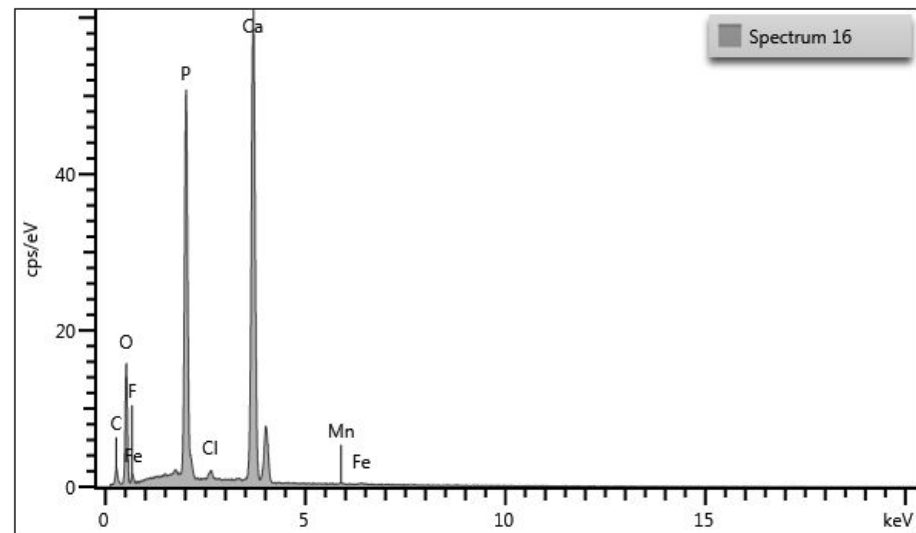



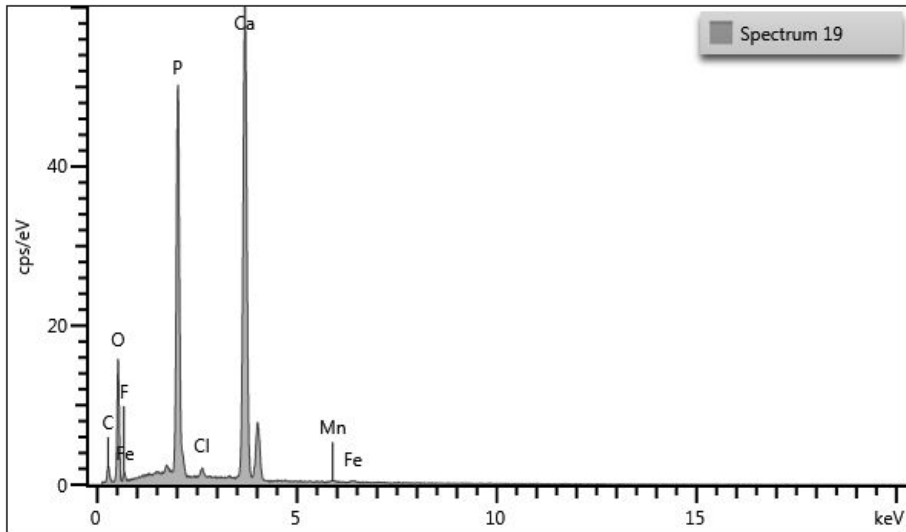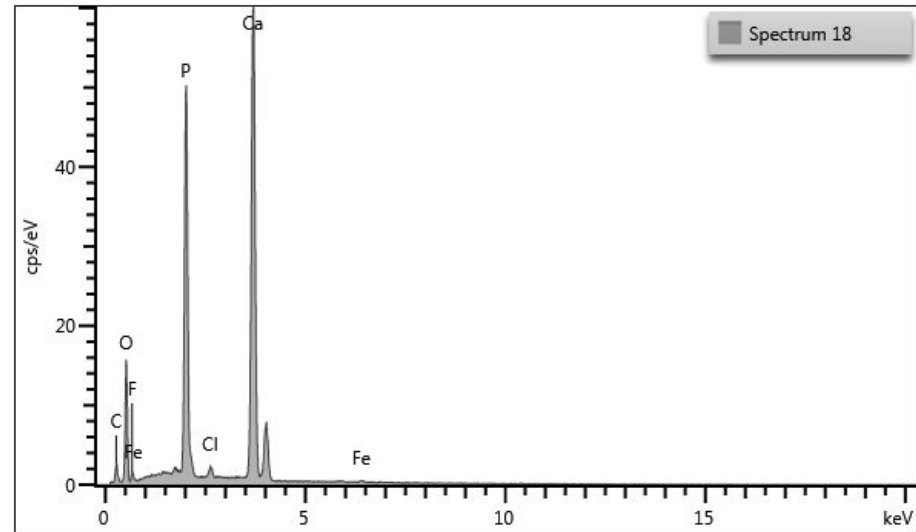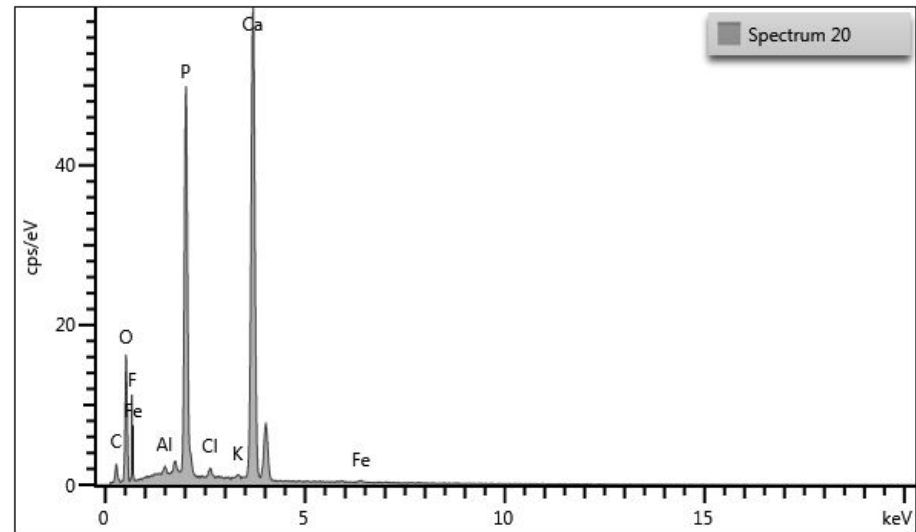

Electron Image 4

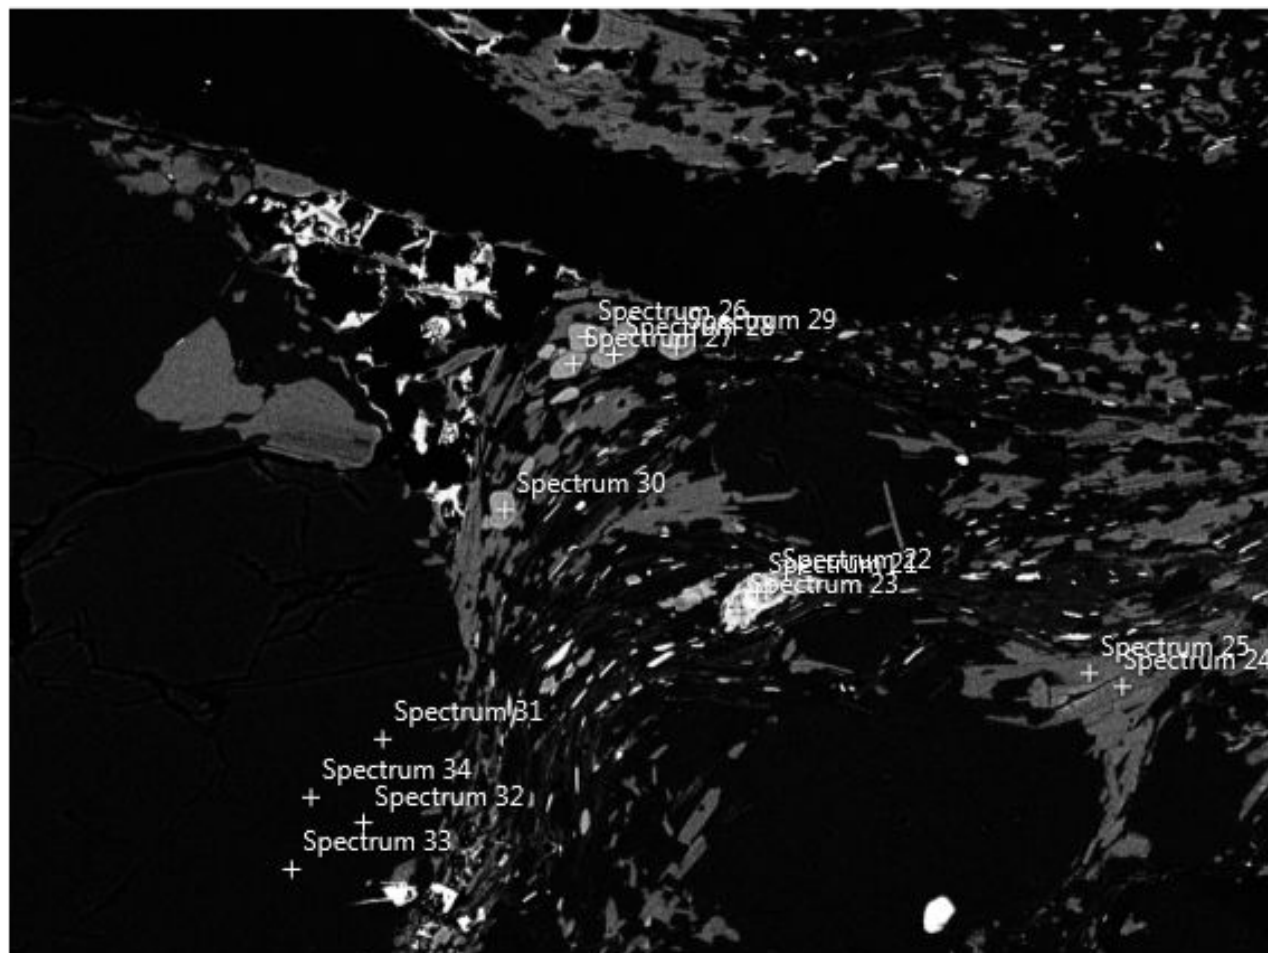

100μm

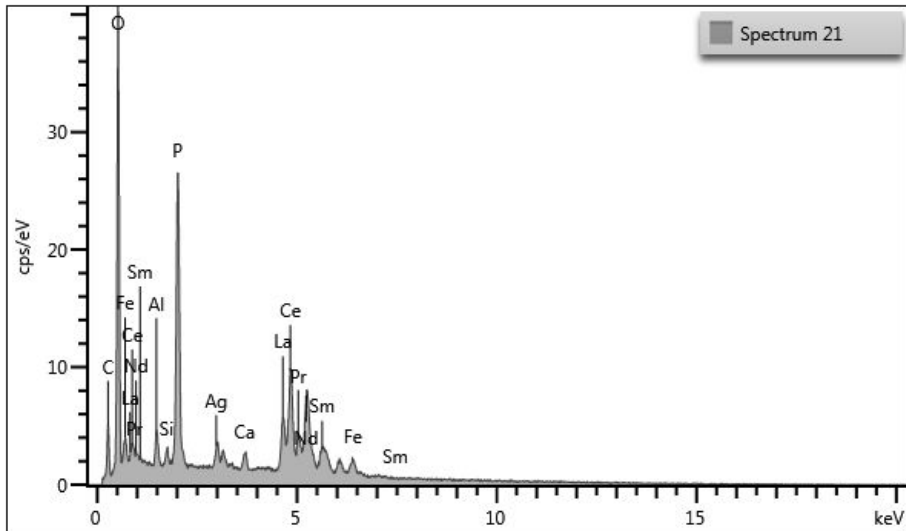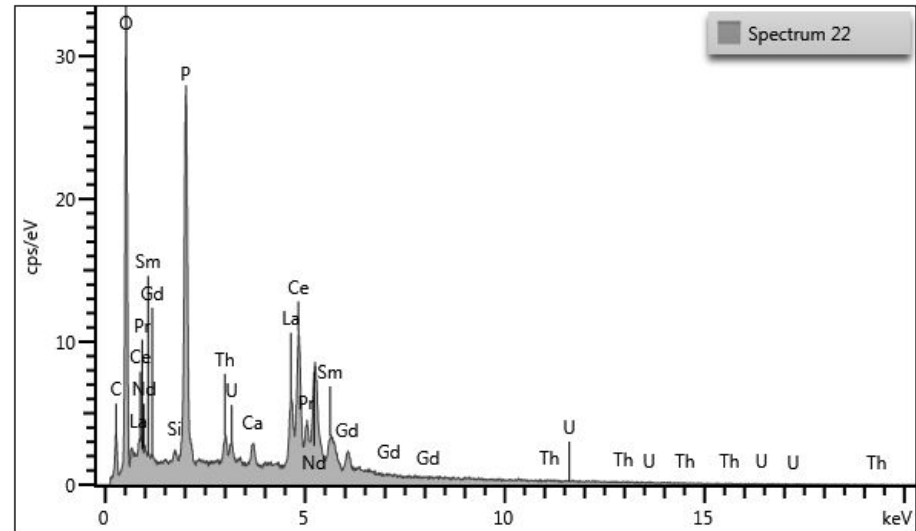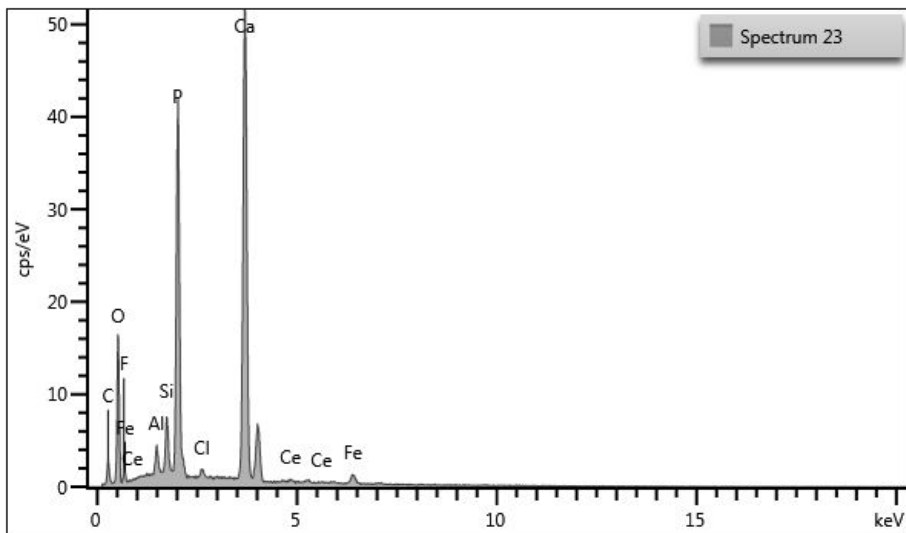

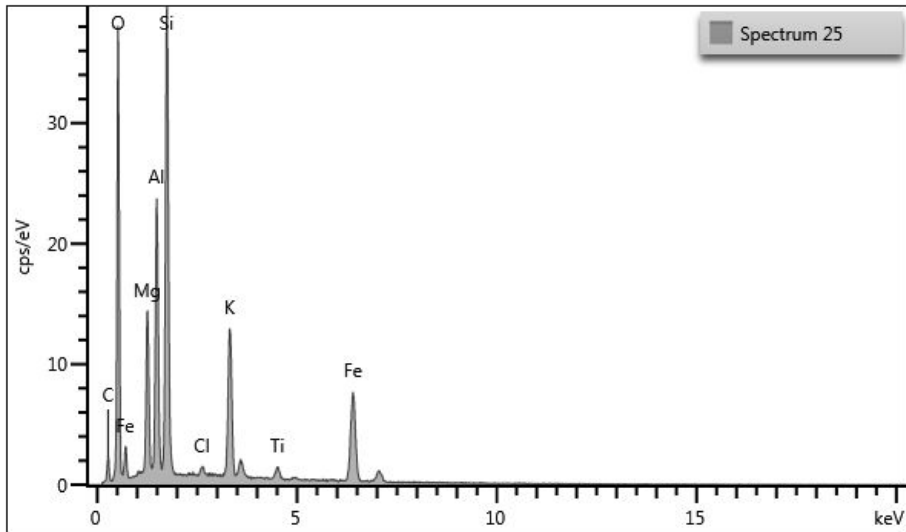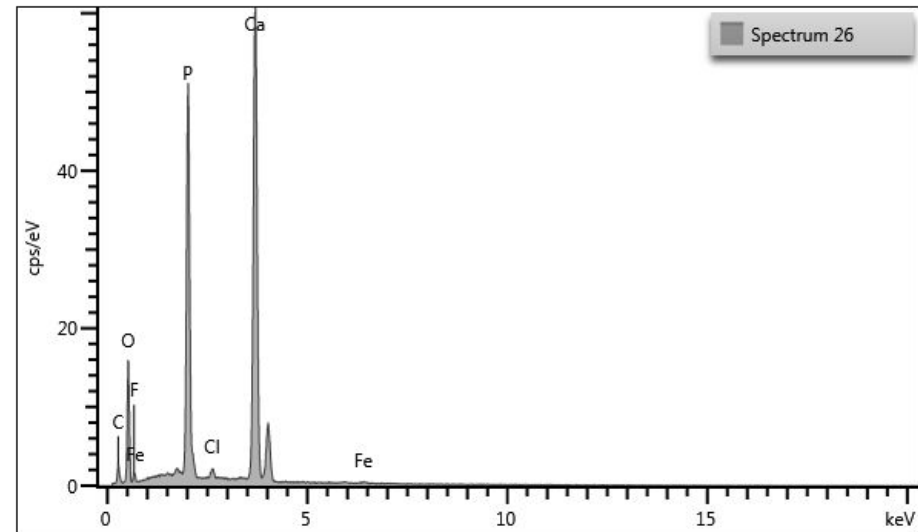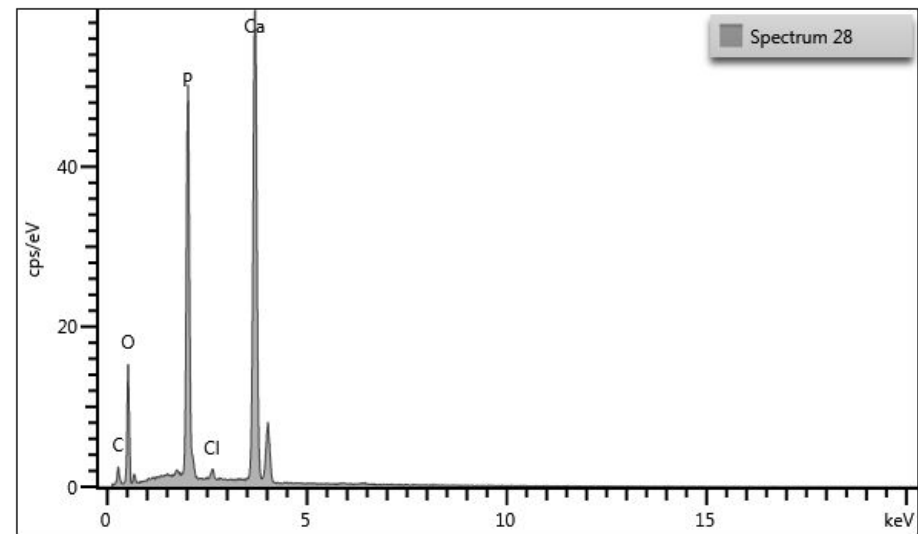

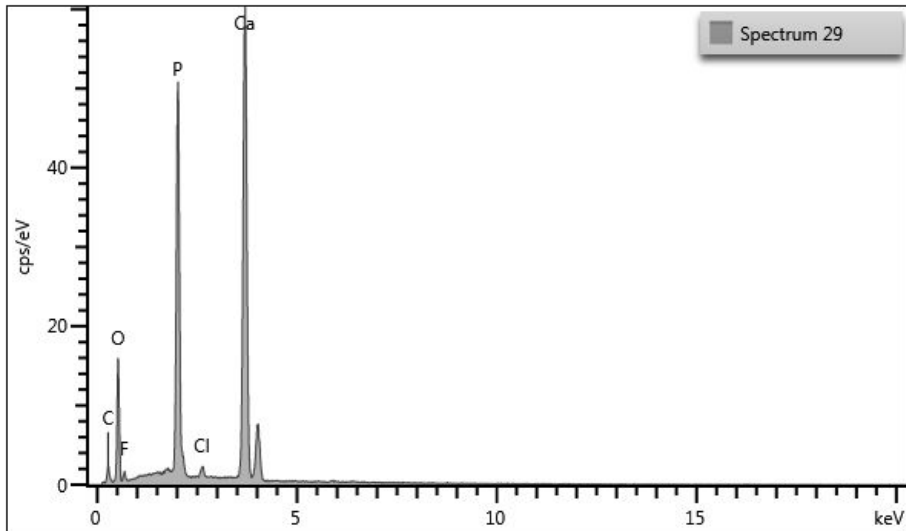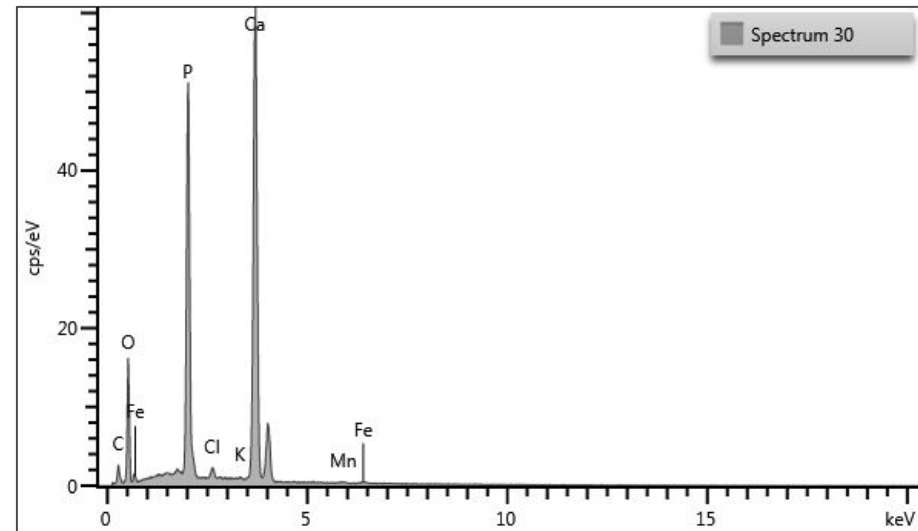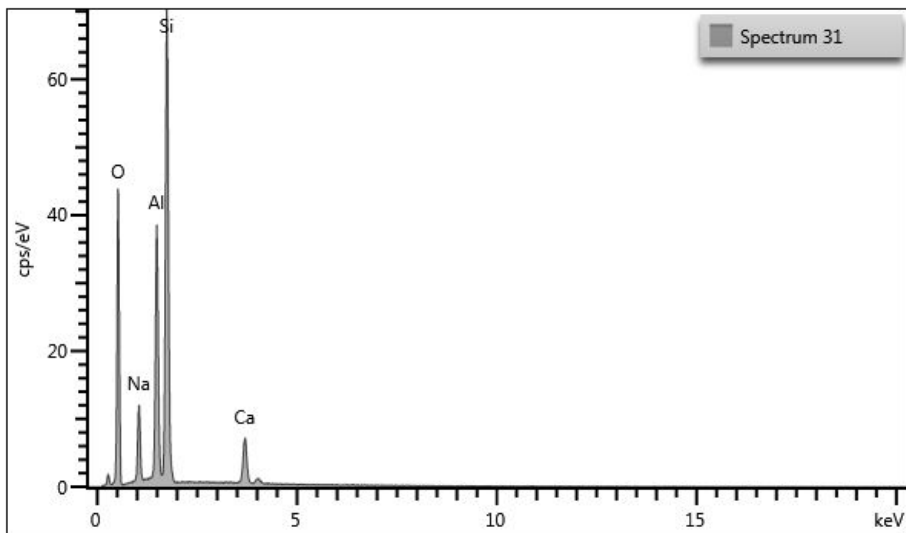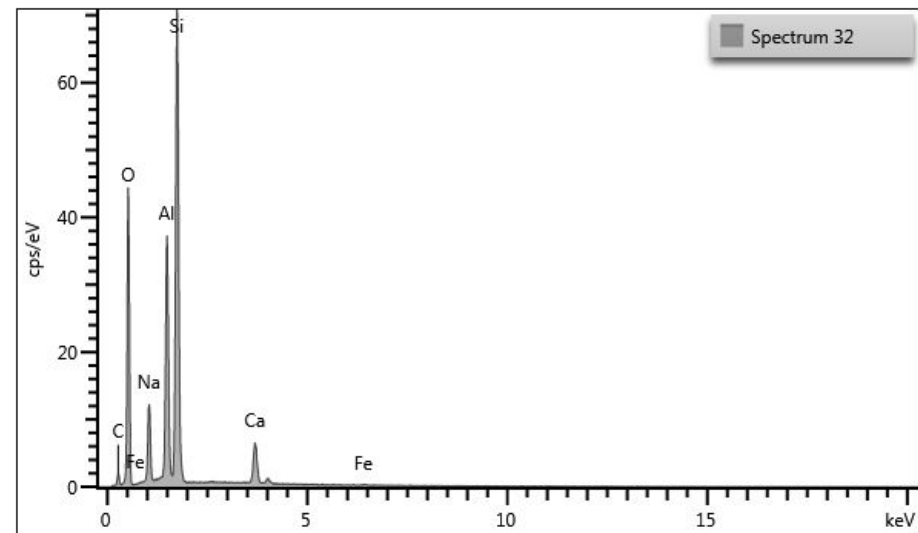

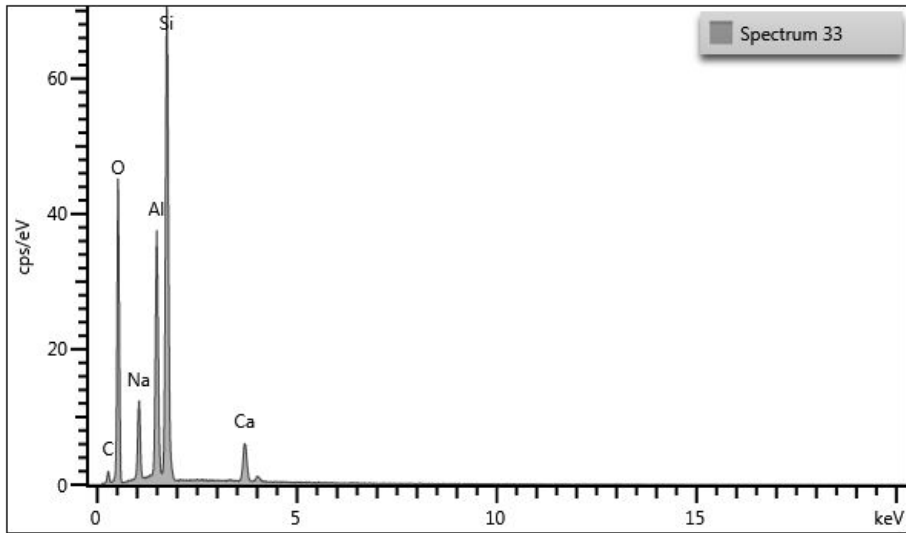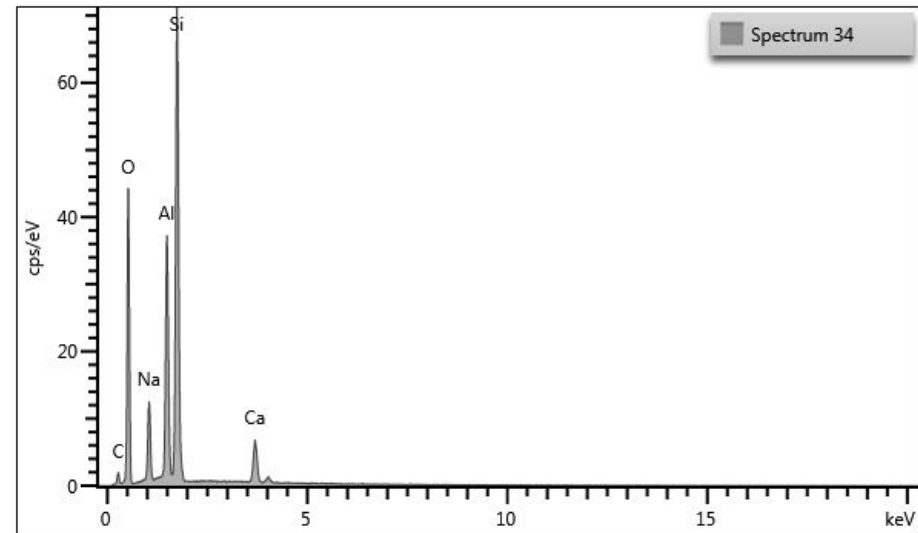

Electron Image 5

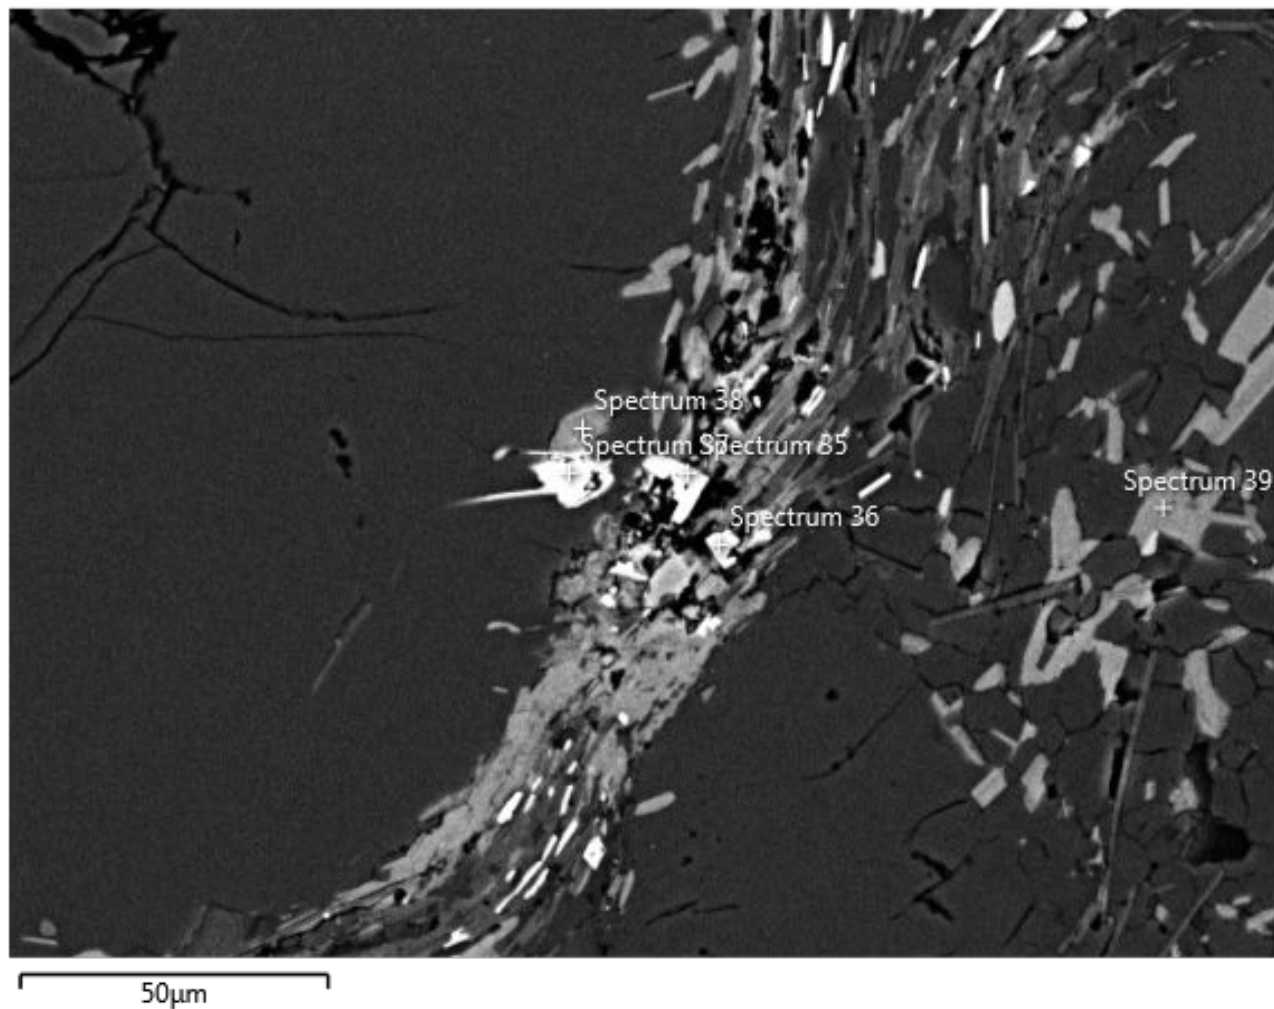

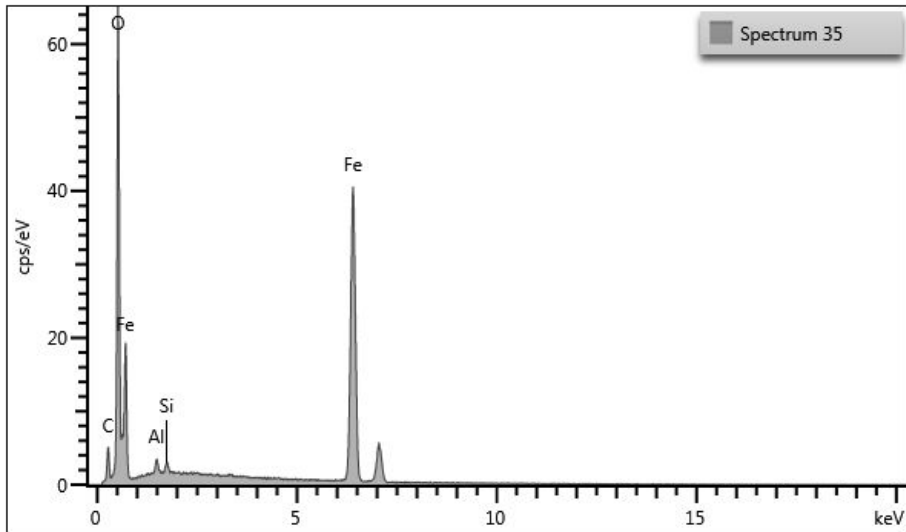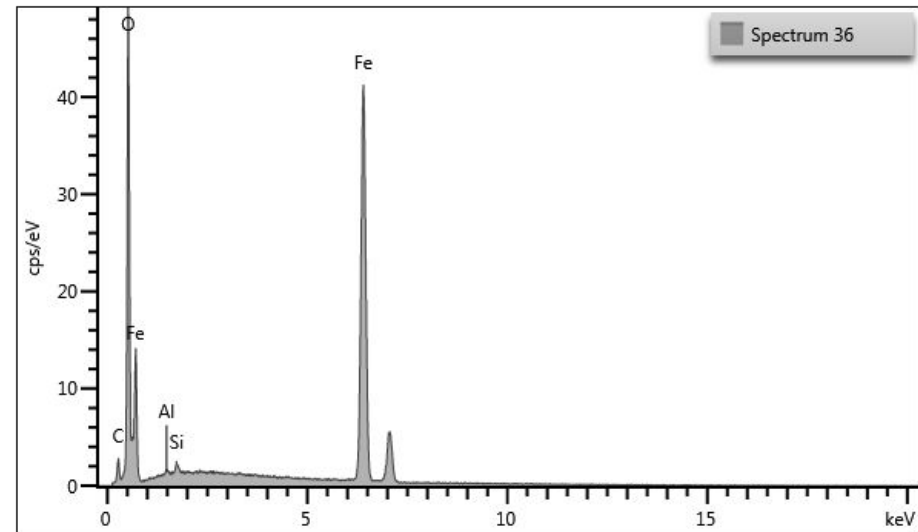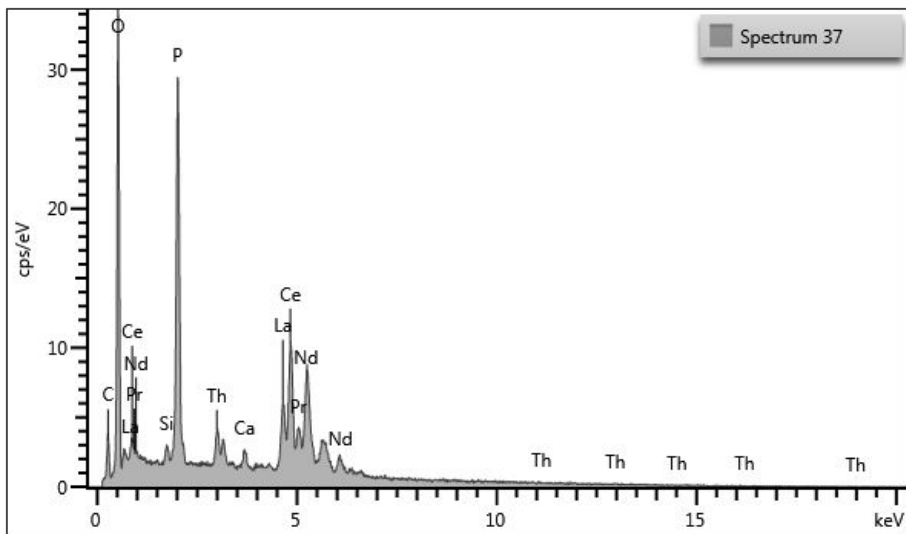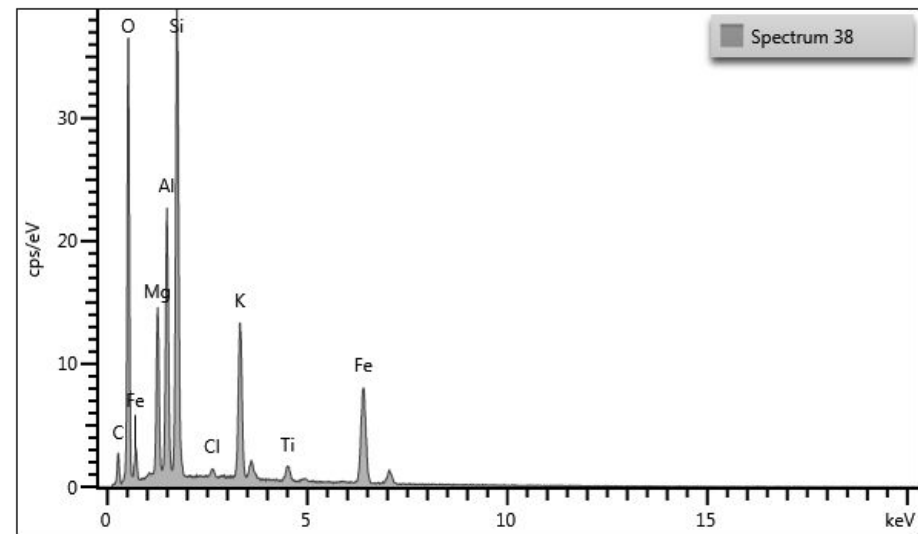



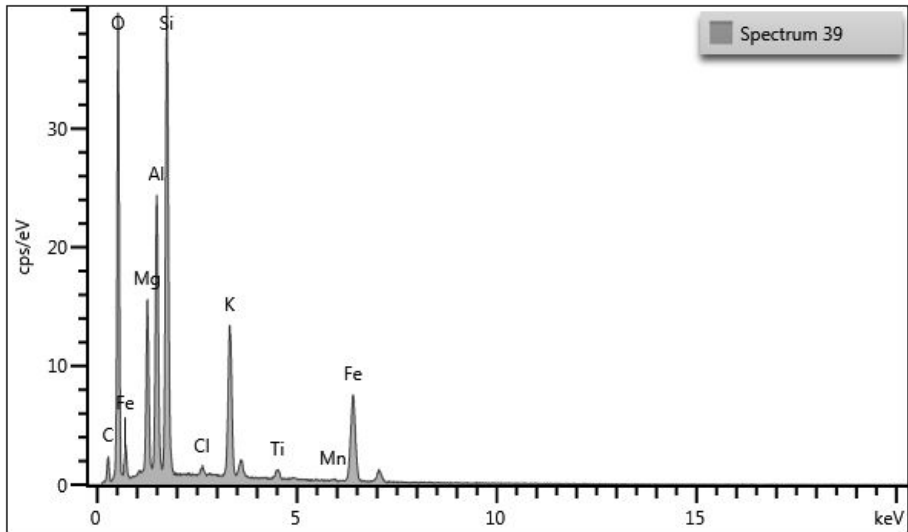

Electron Image 6

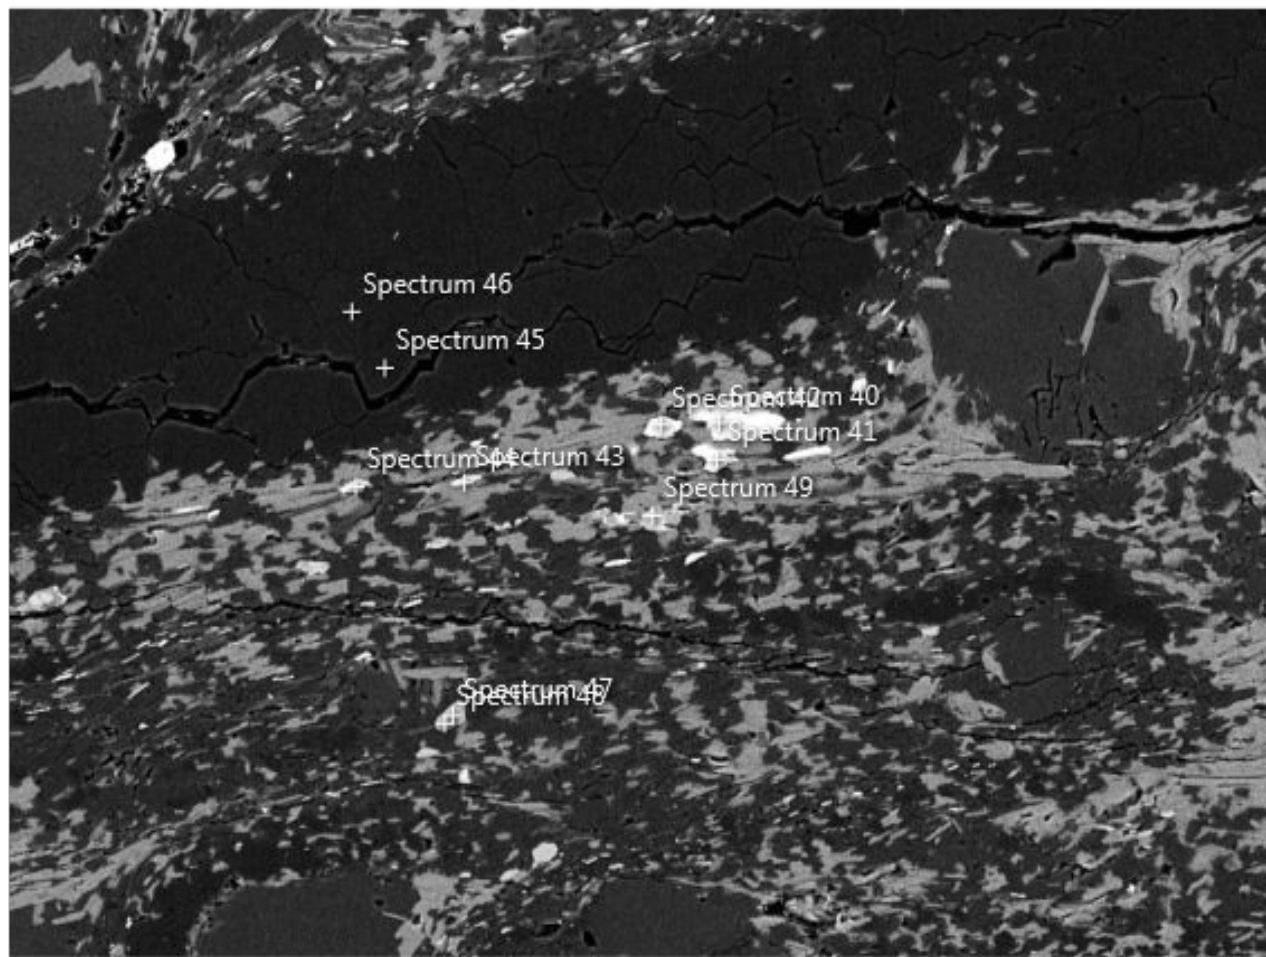

100μm

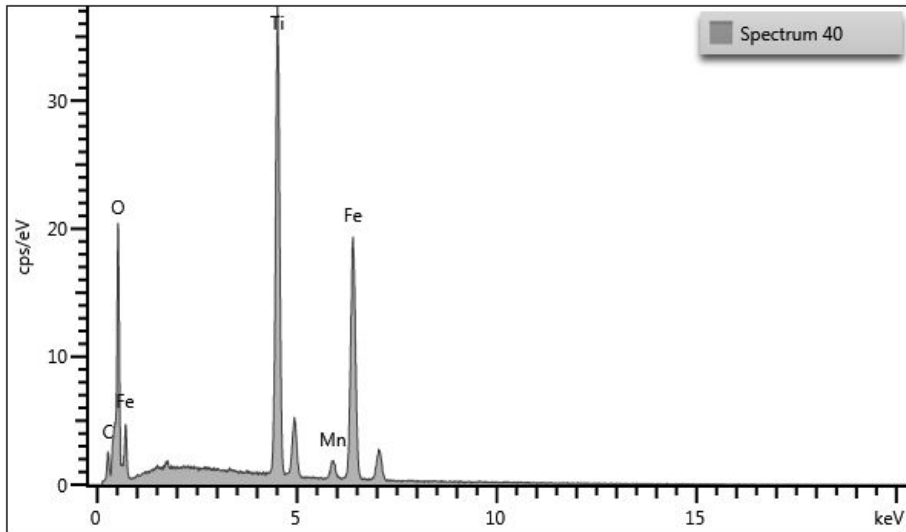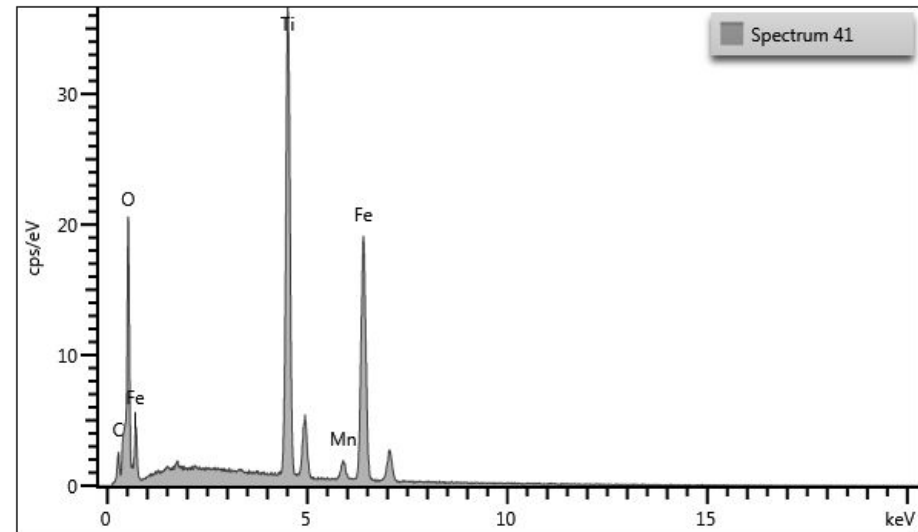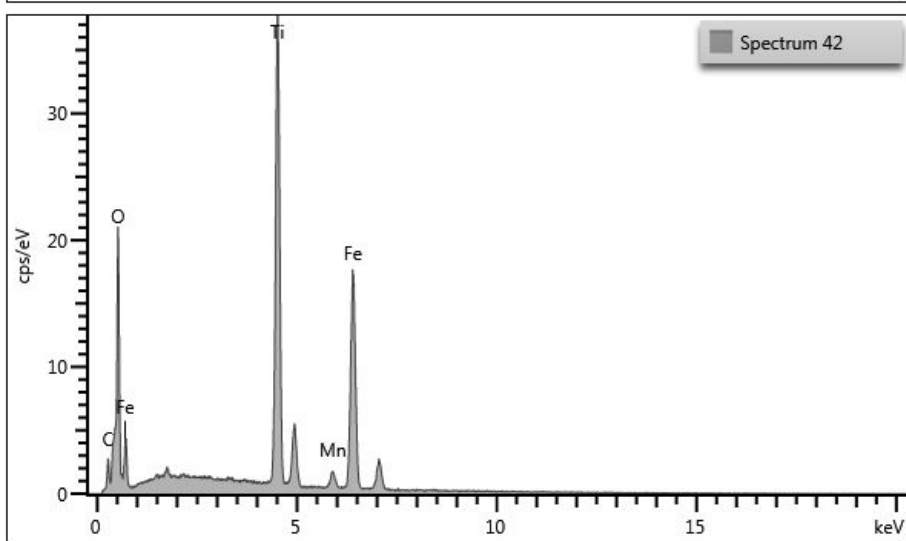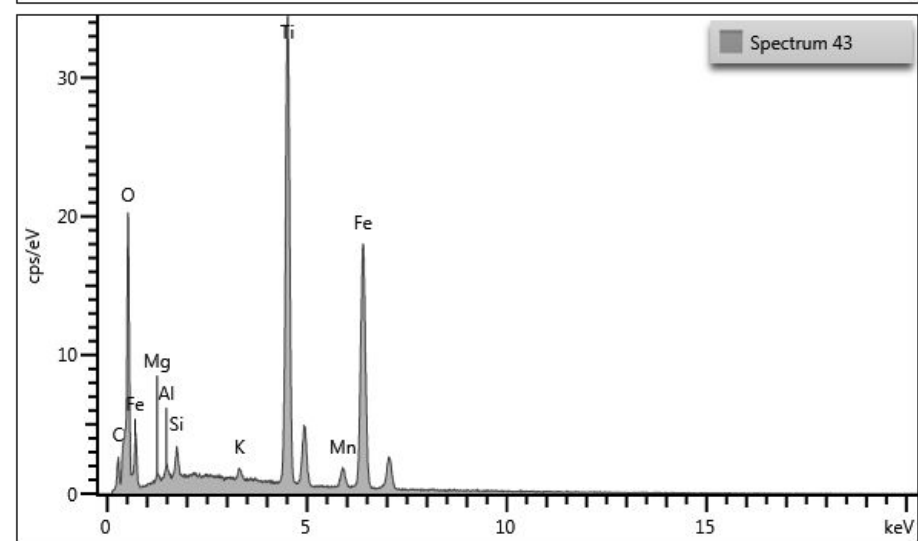

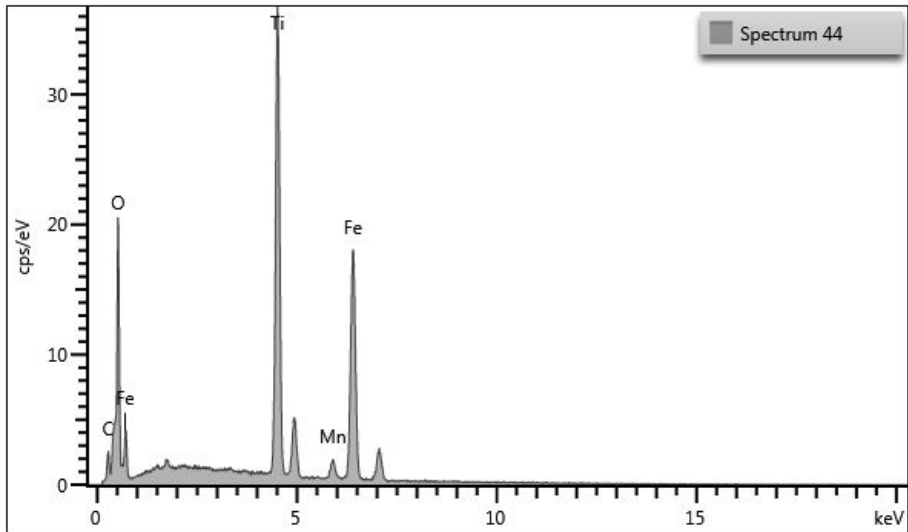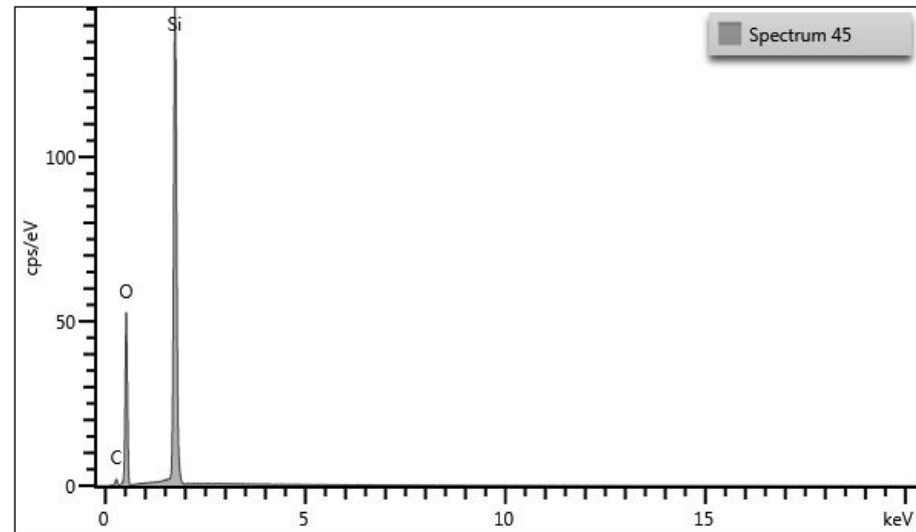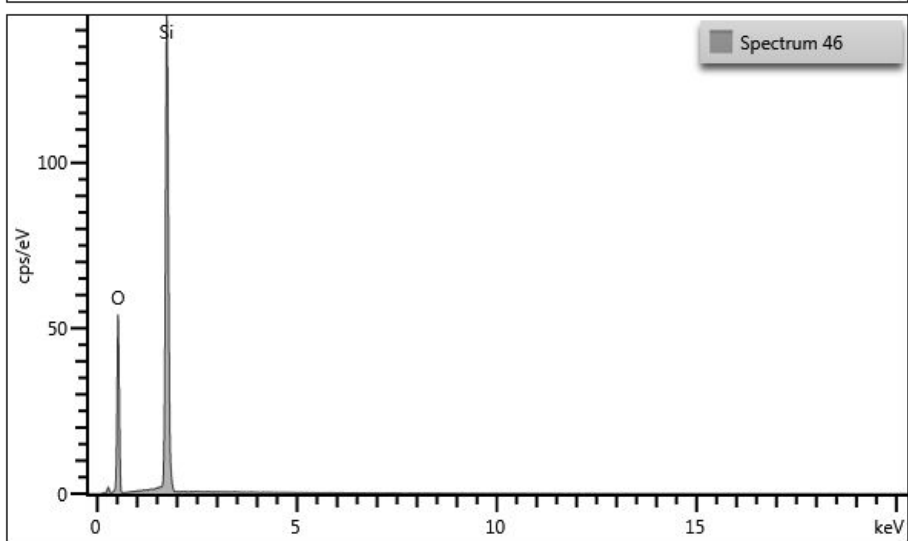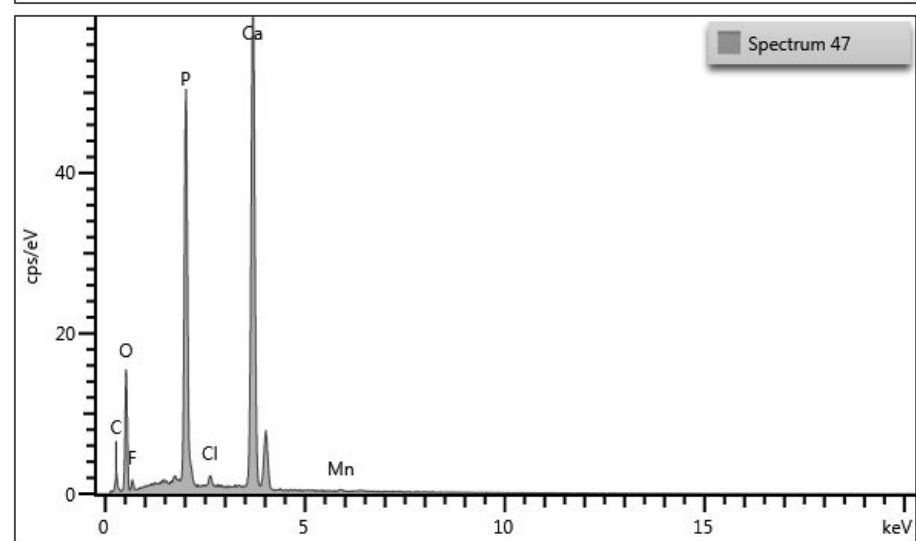

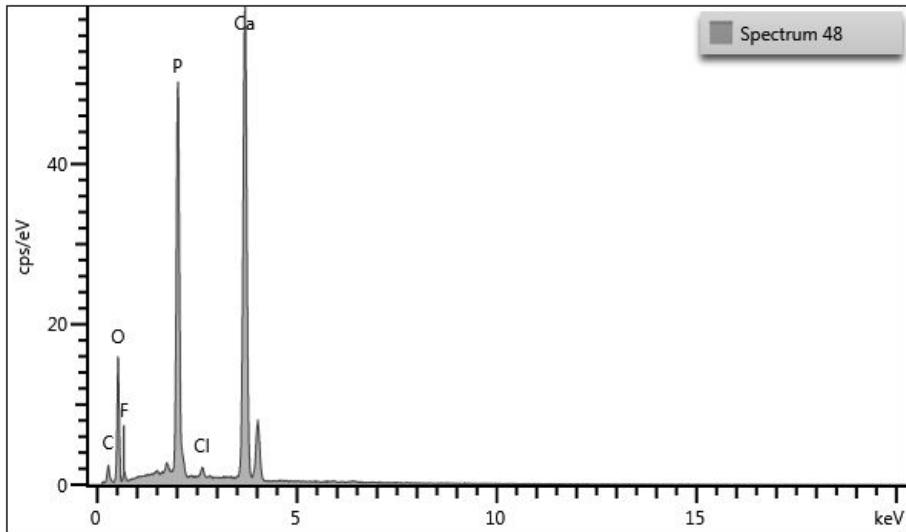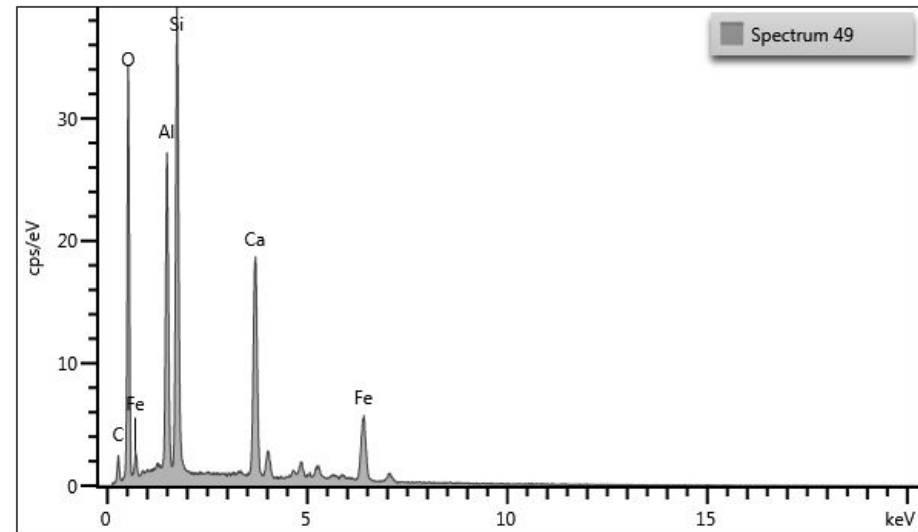

Electron Image 7

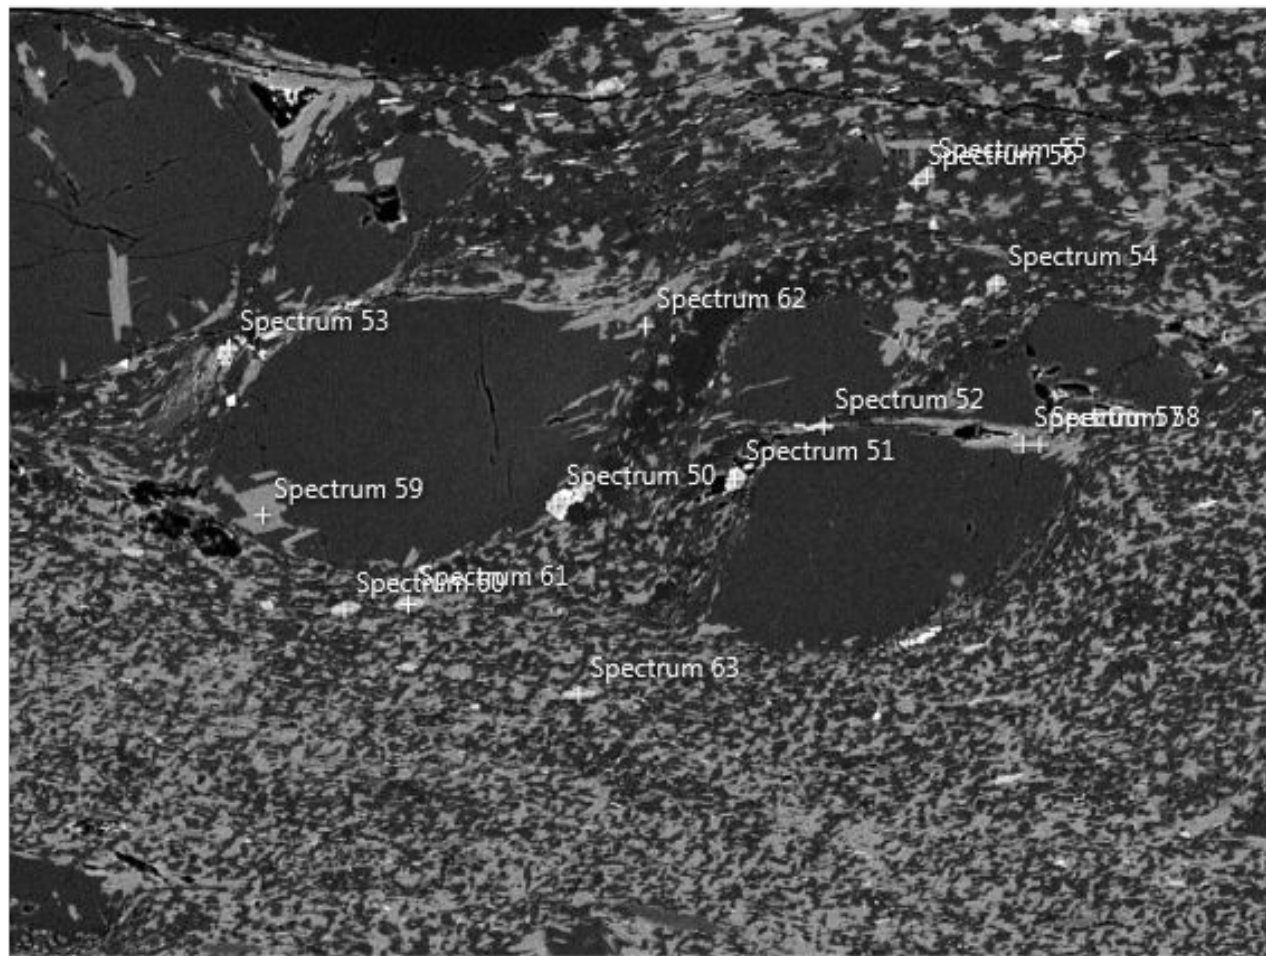

250 $\mu\text{m}$

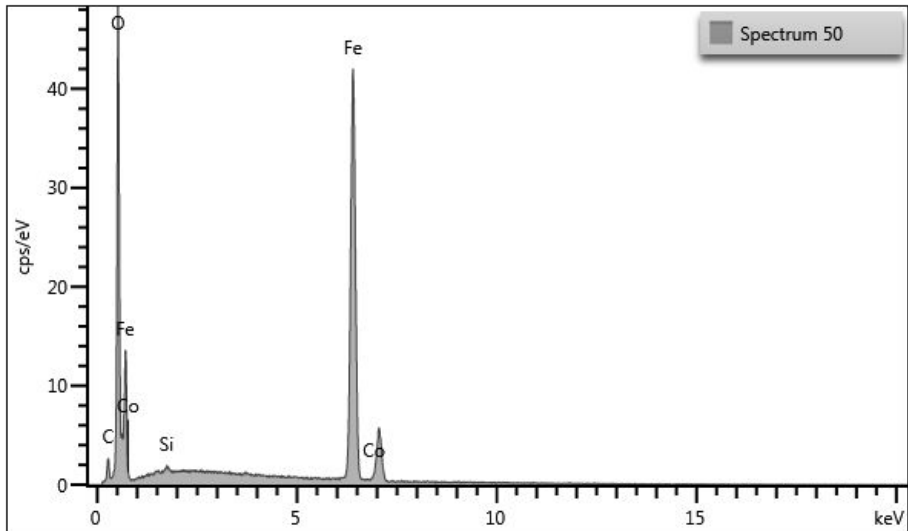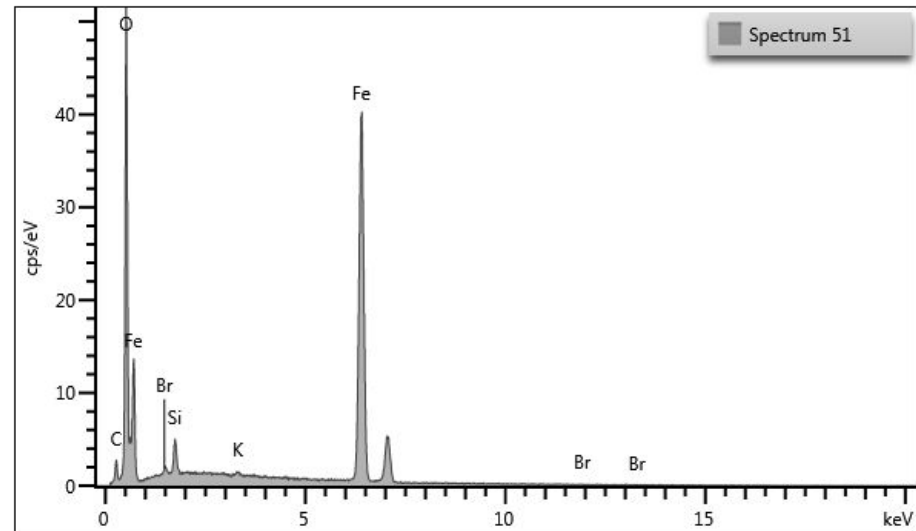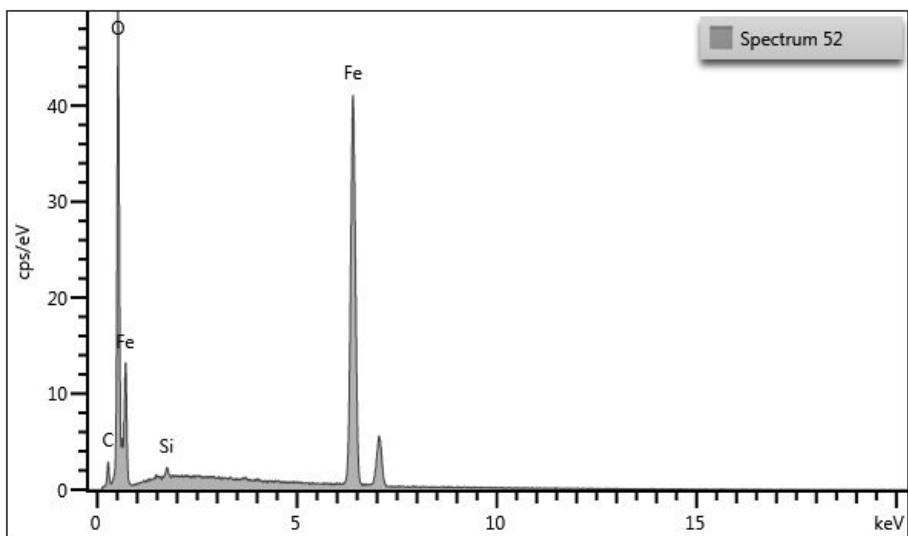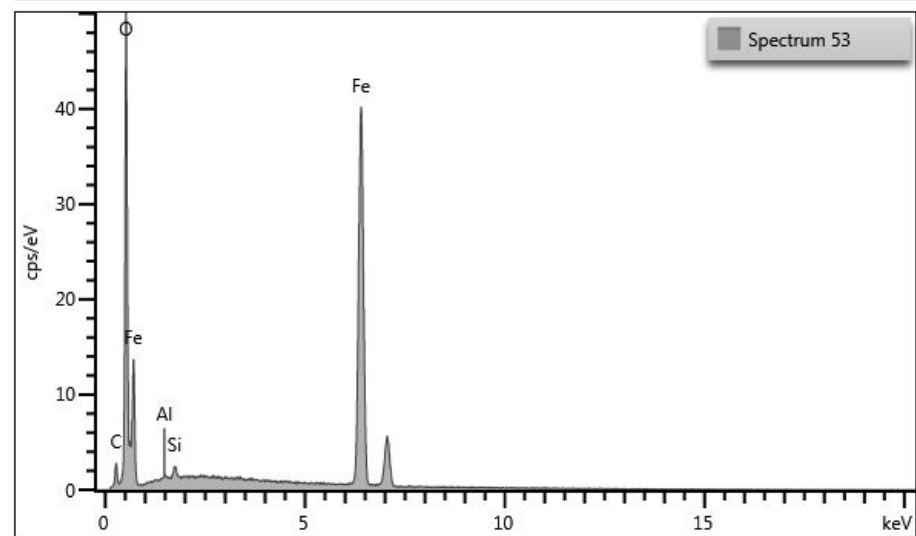

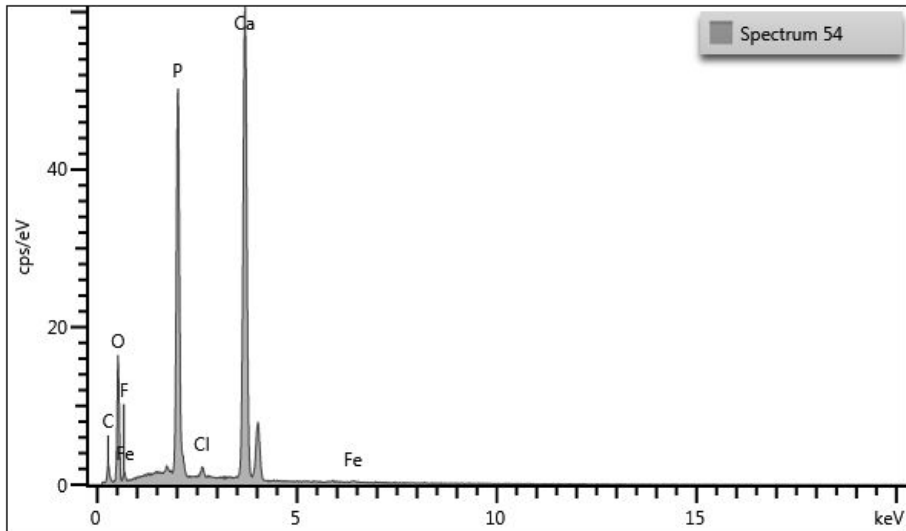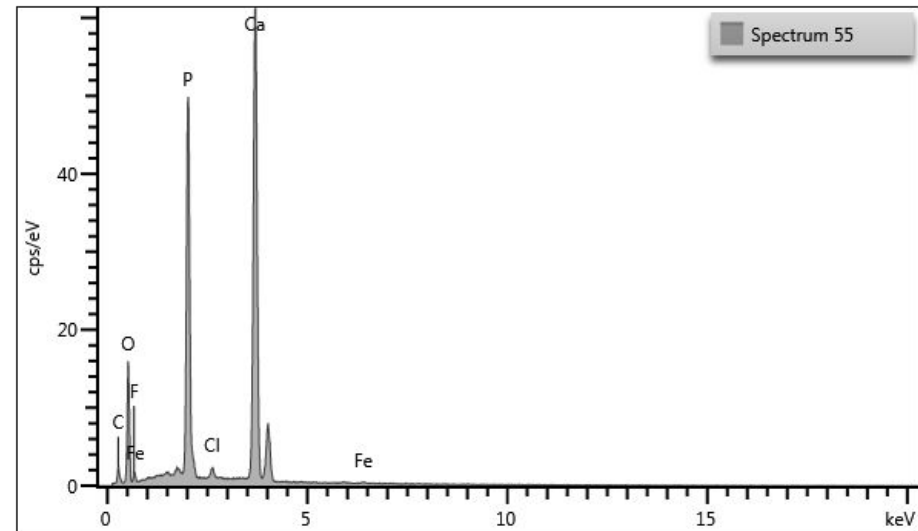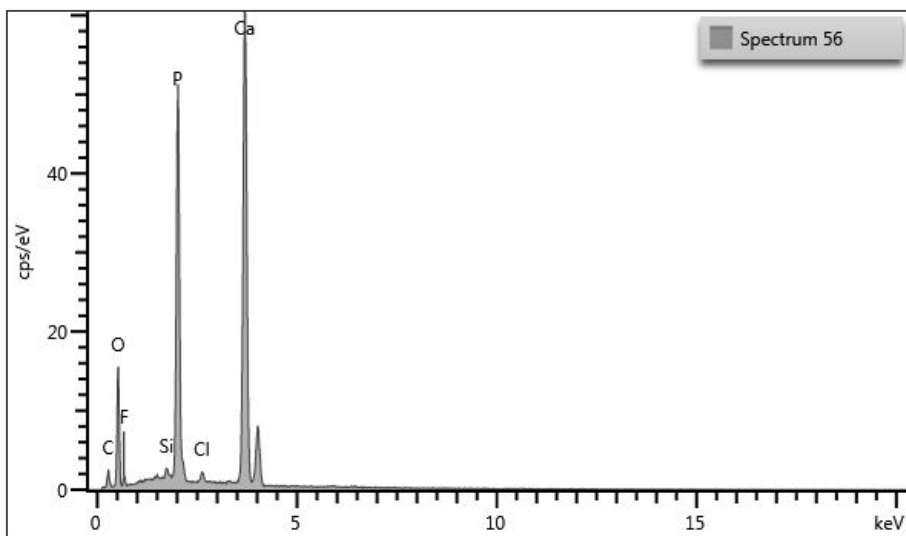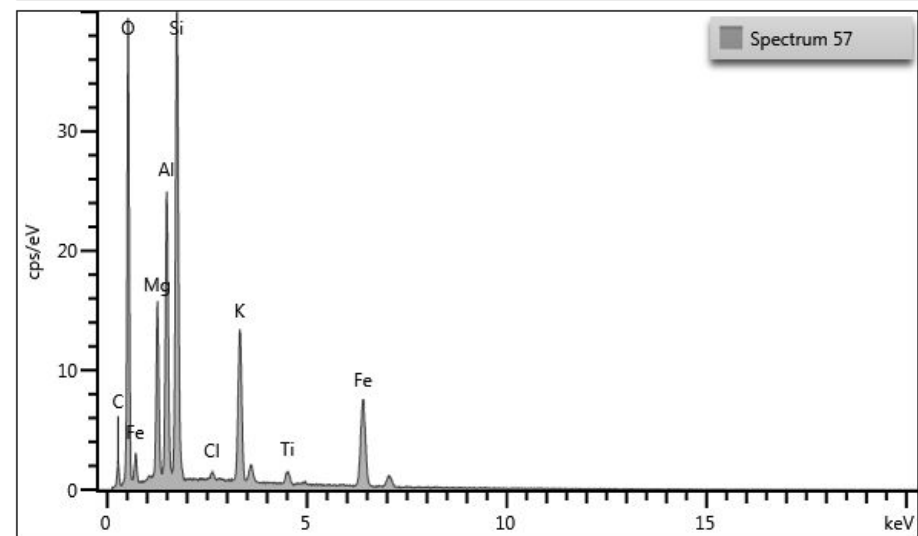



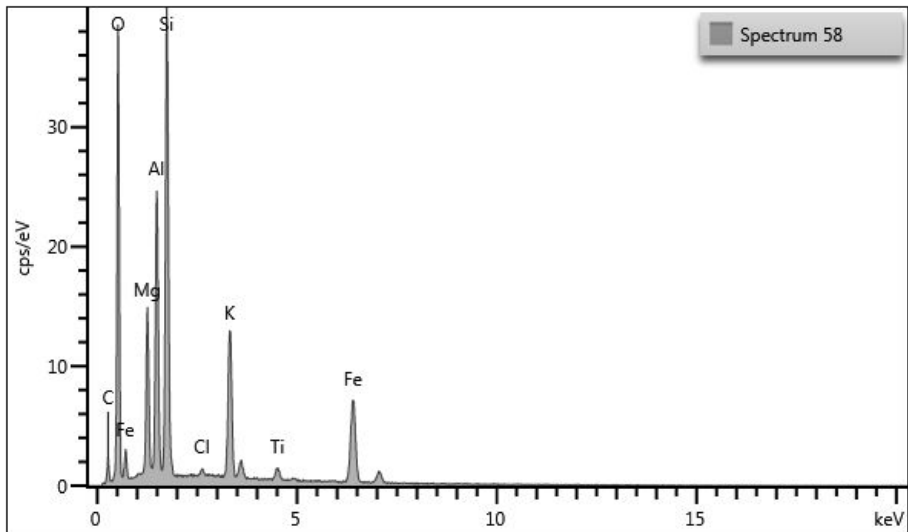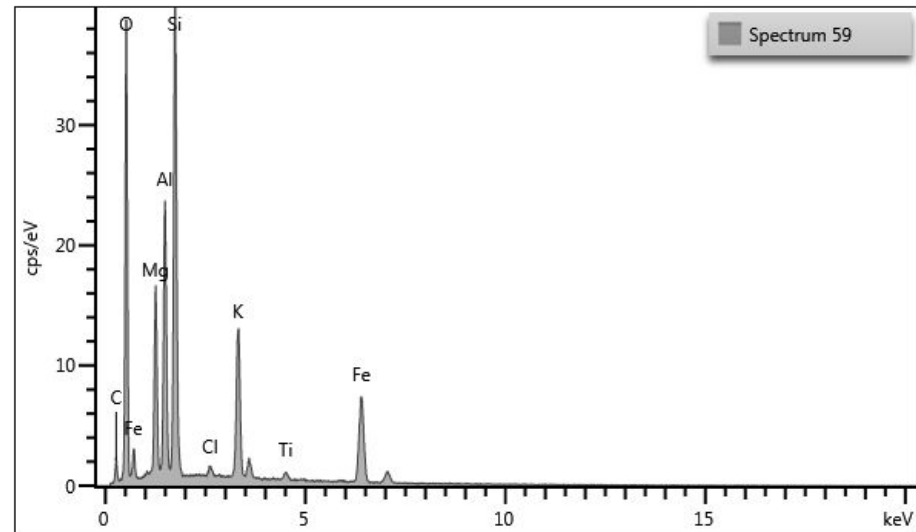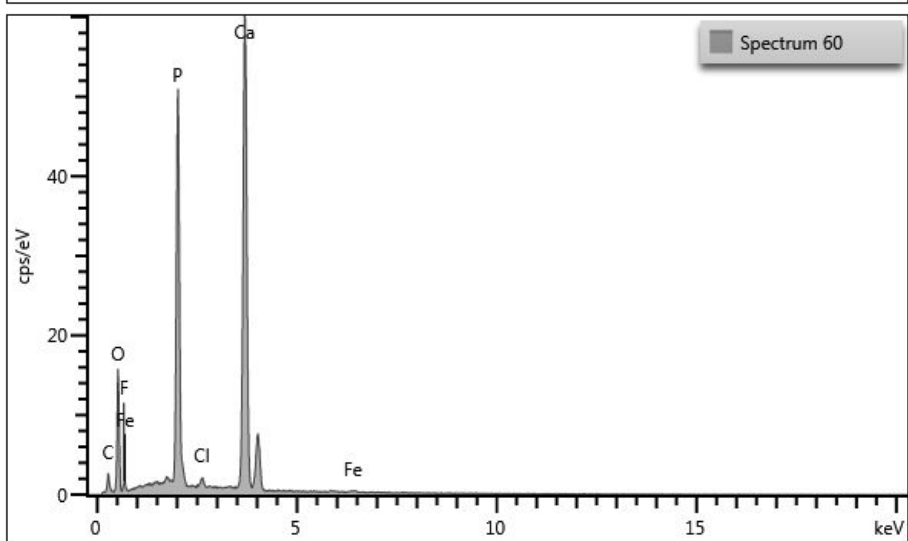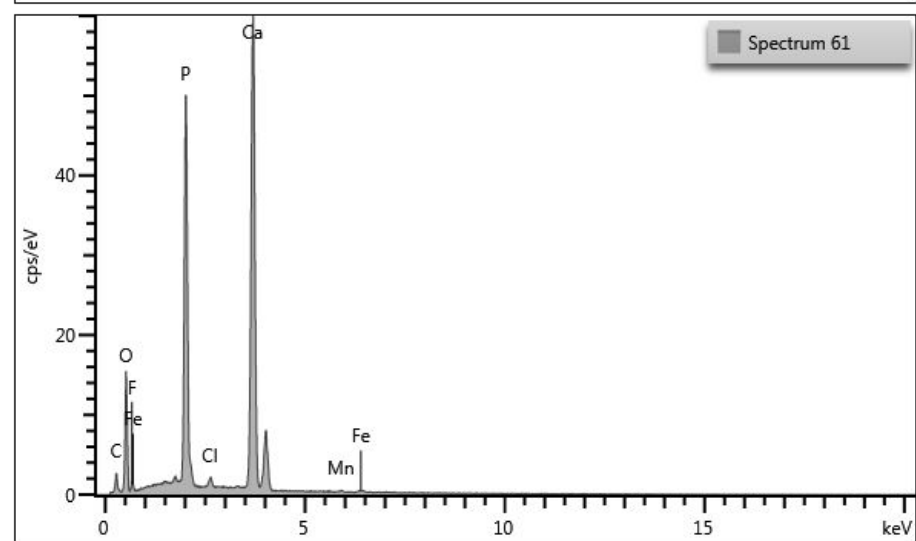

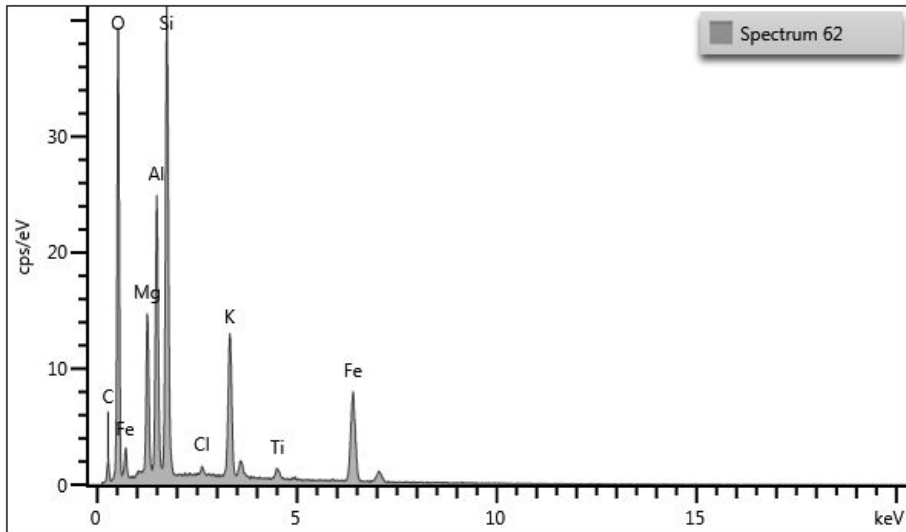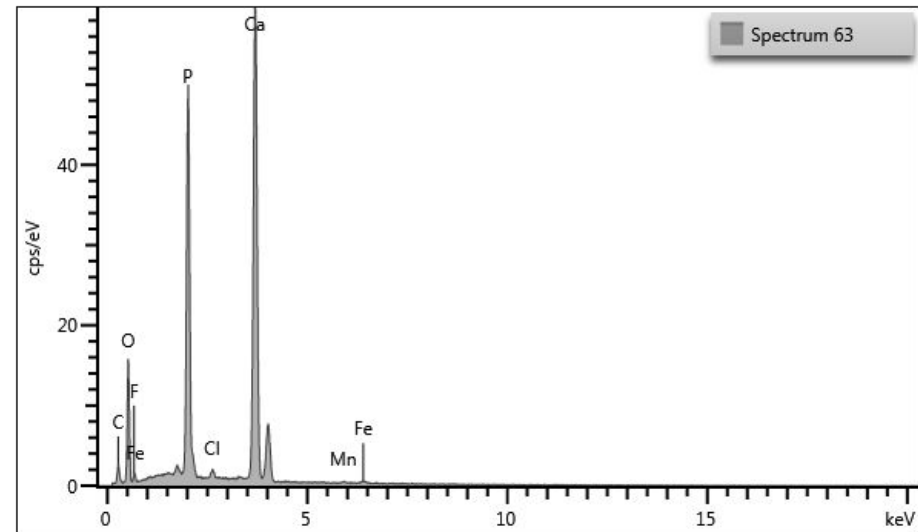

Electron Image 8

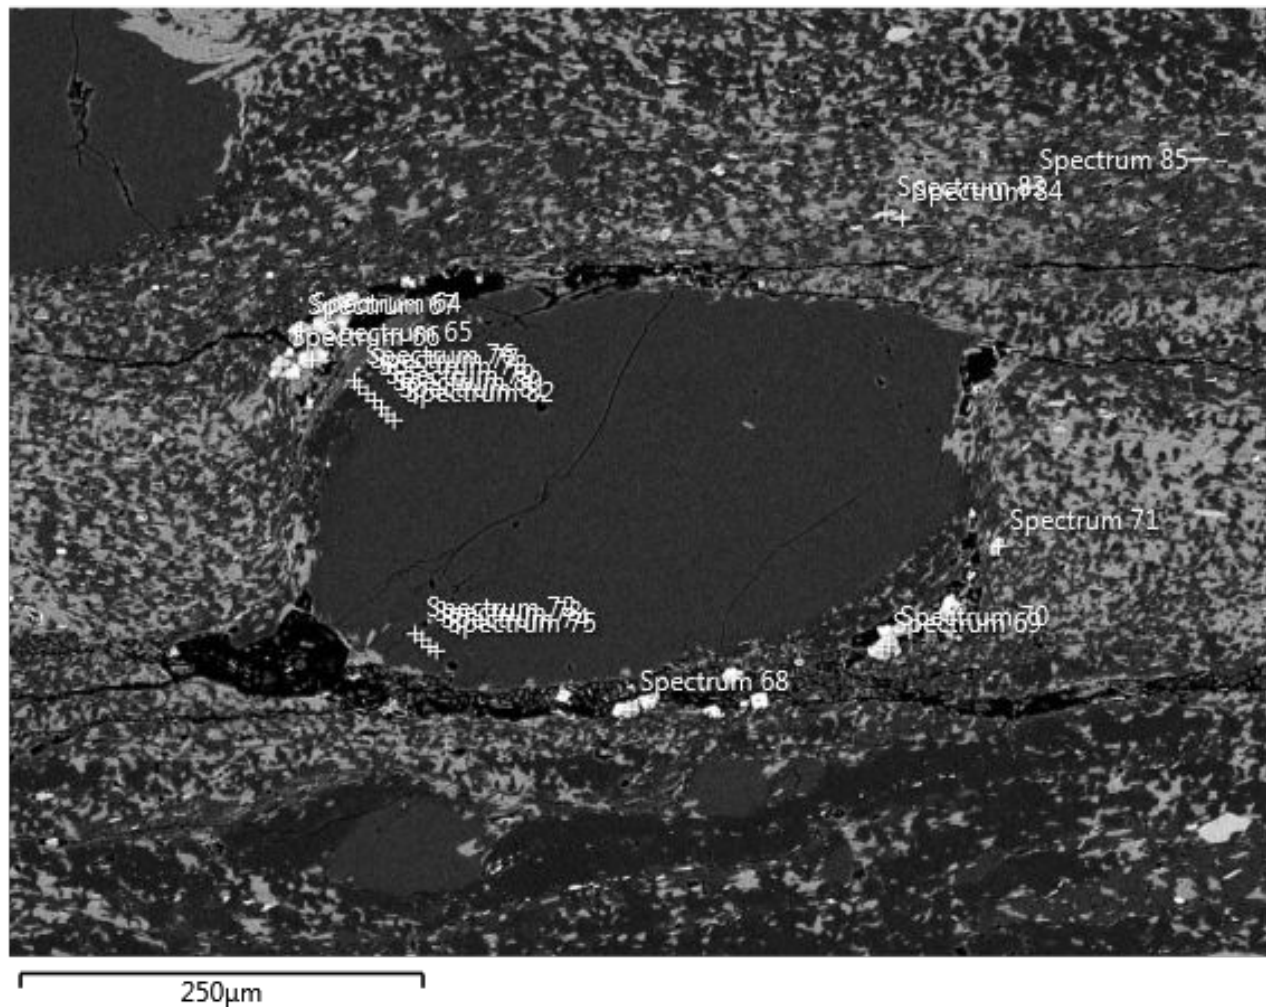

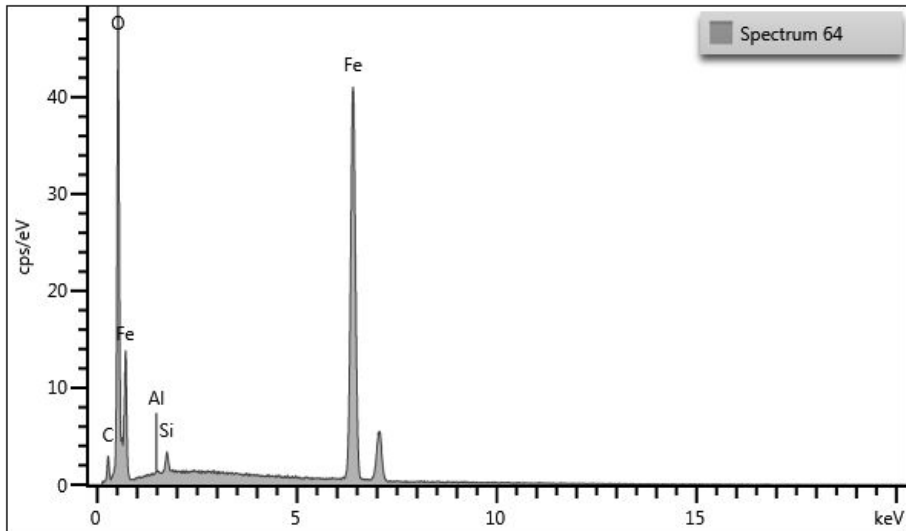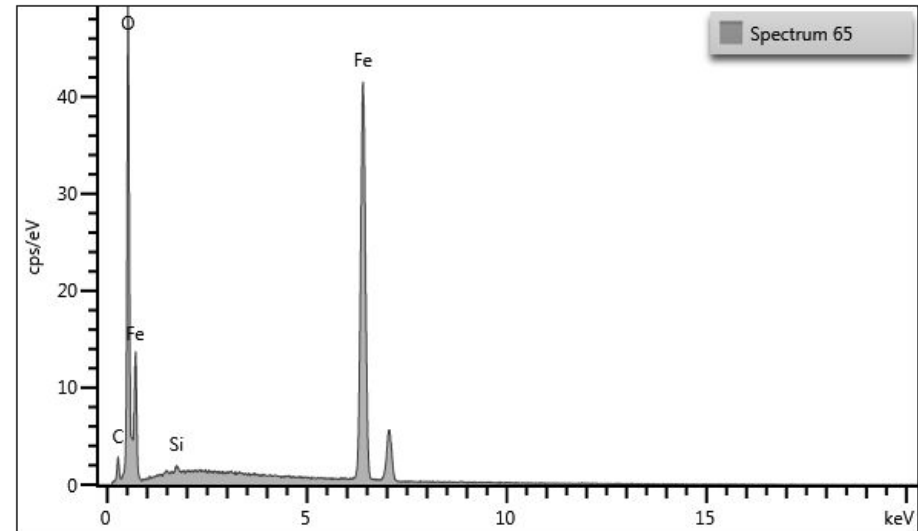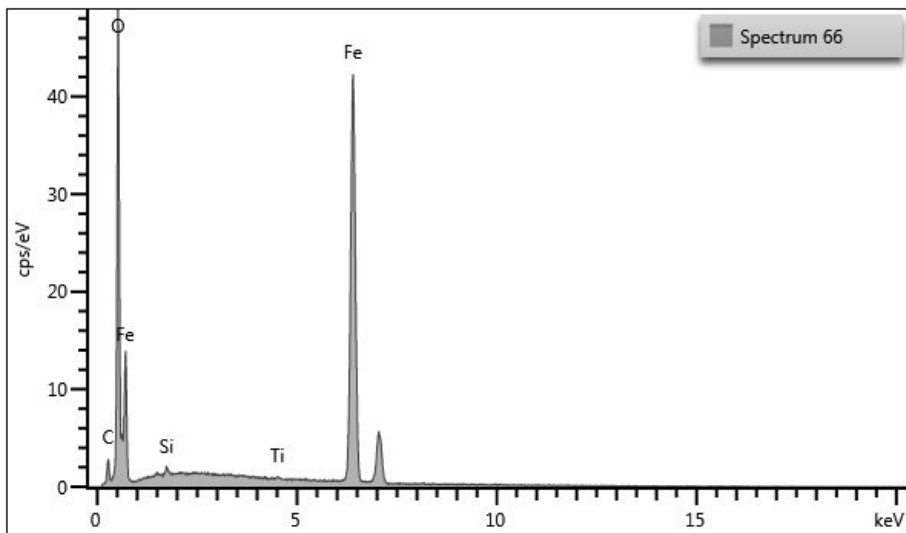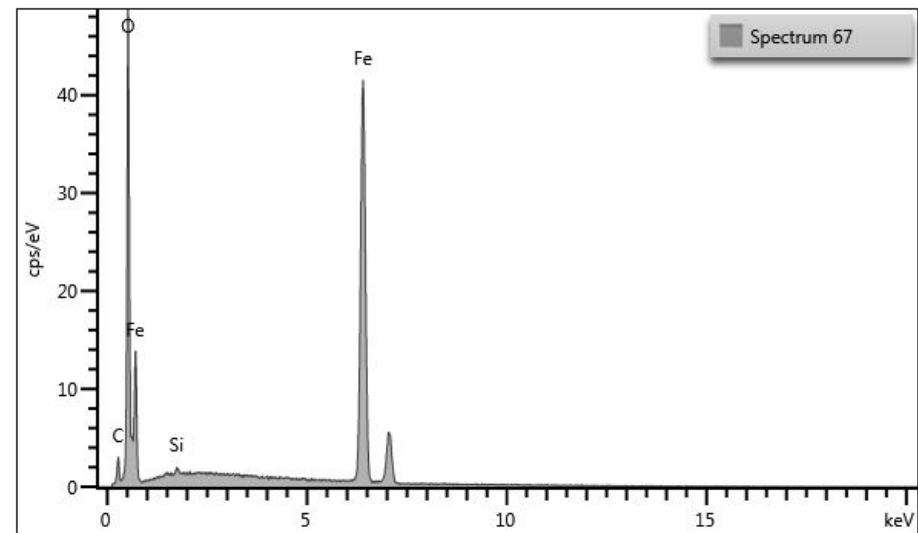

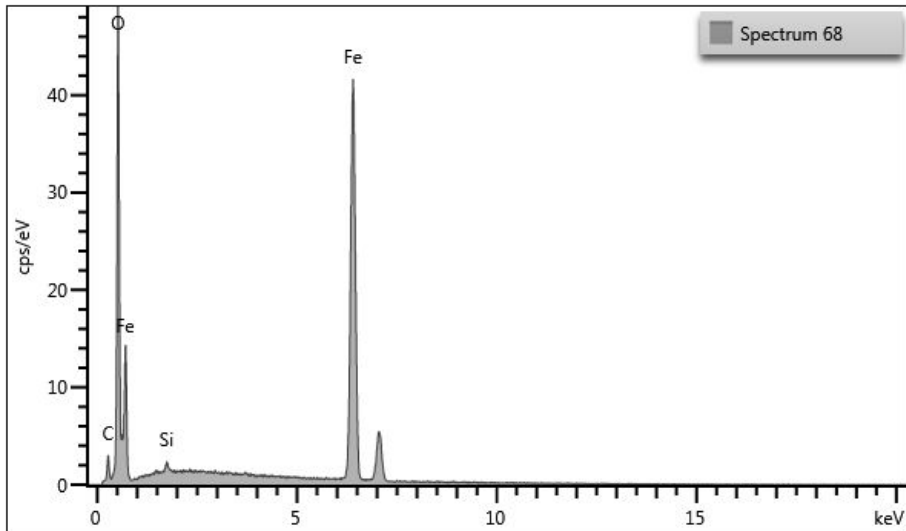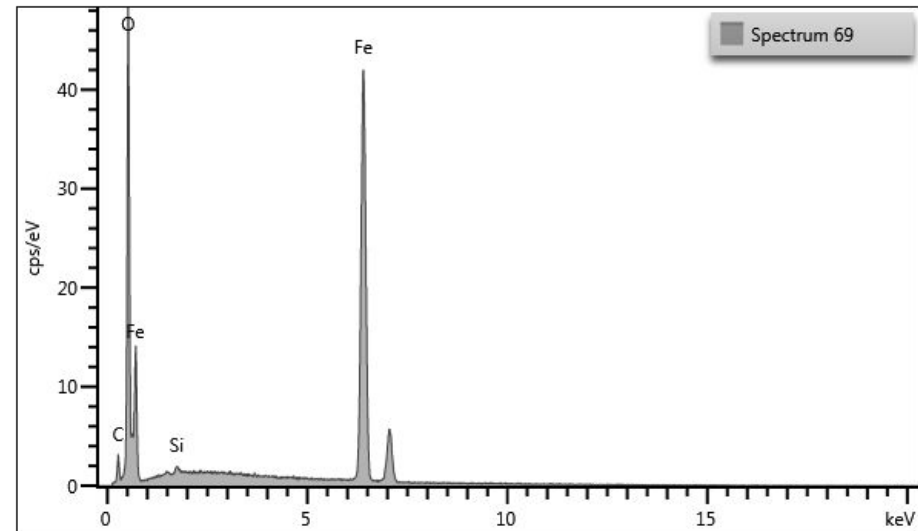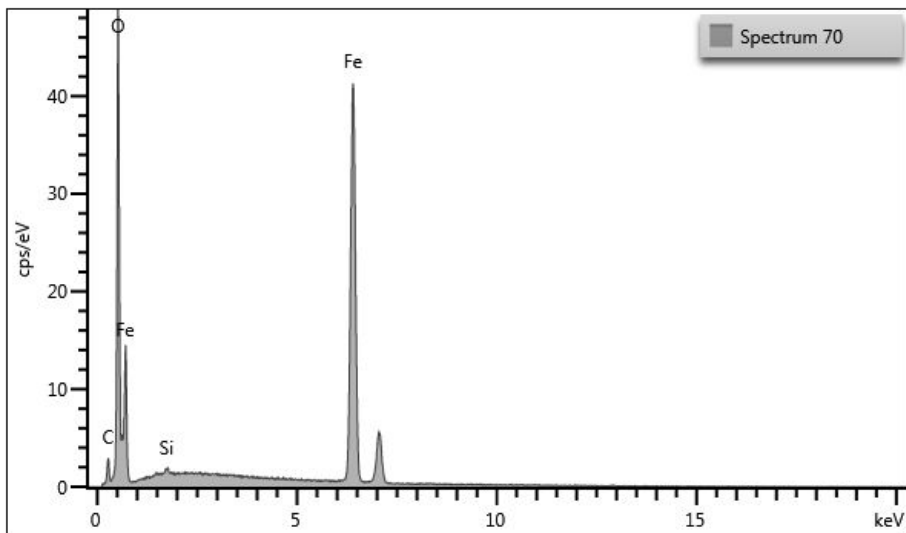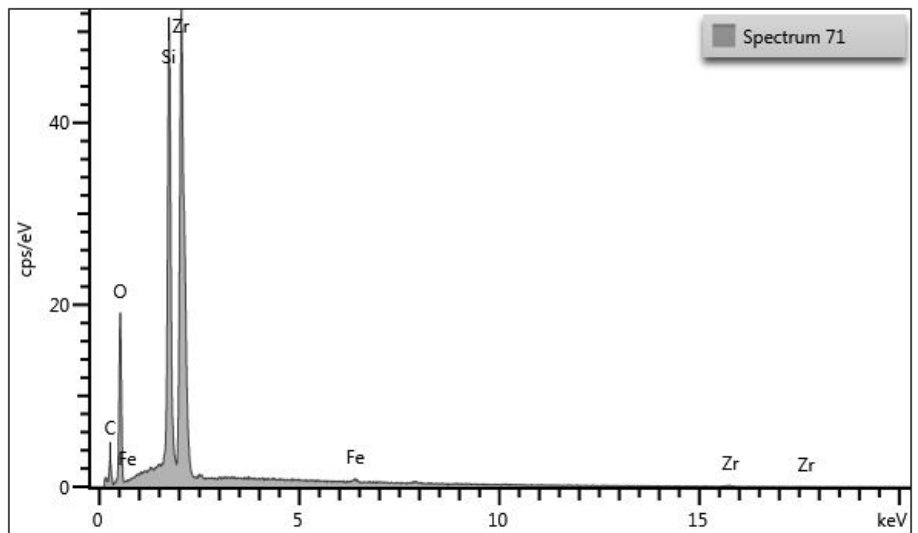

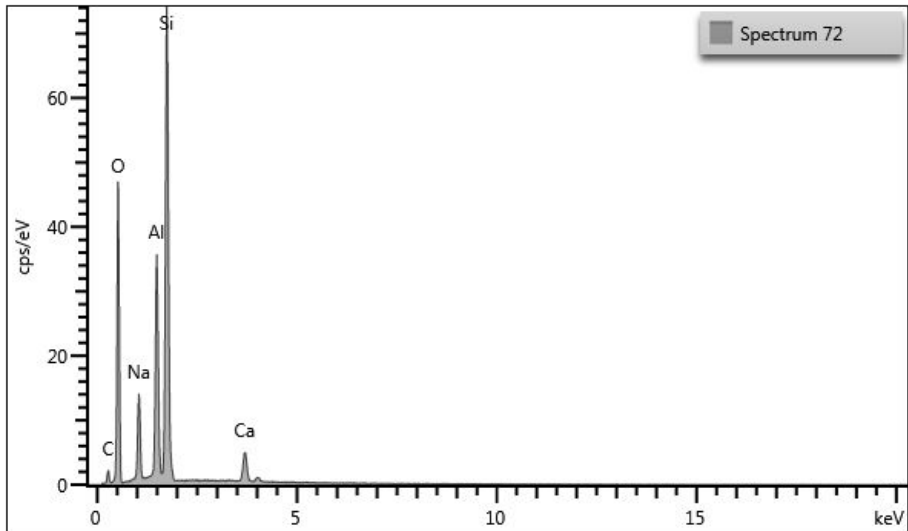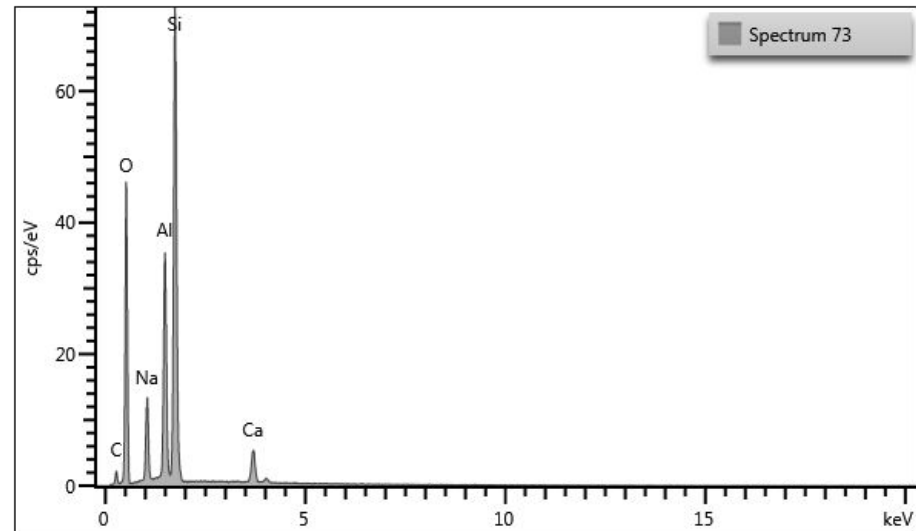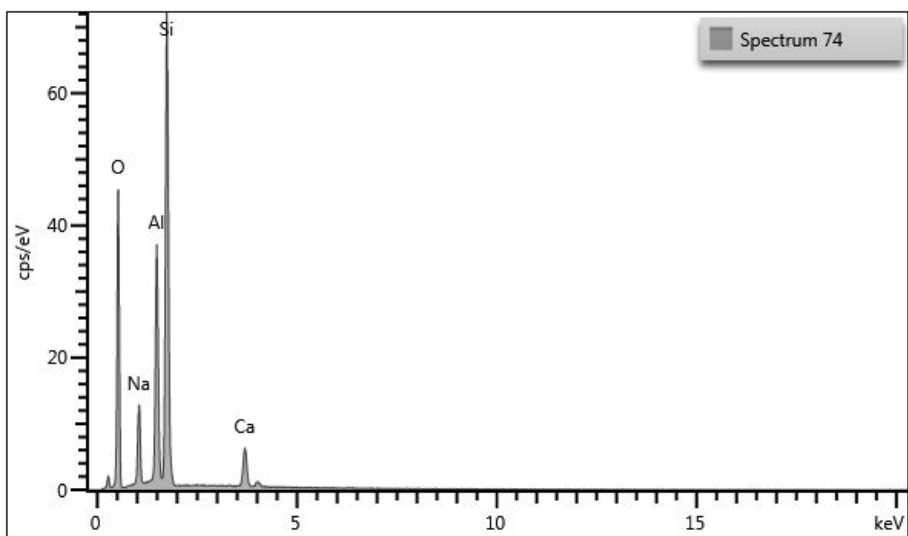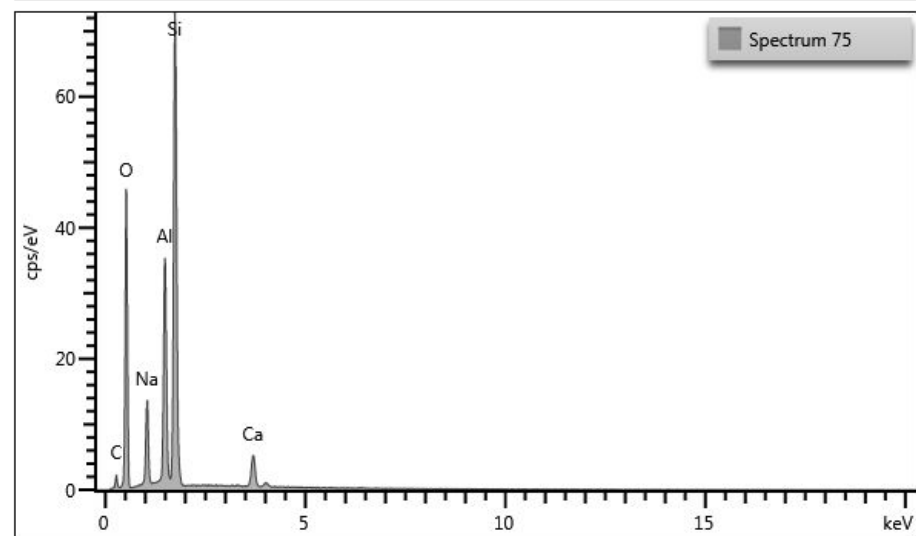

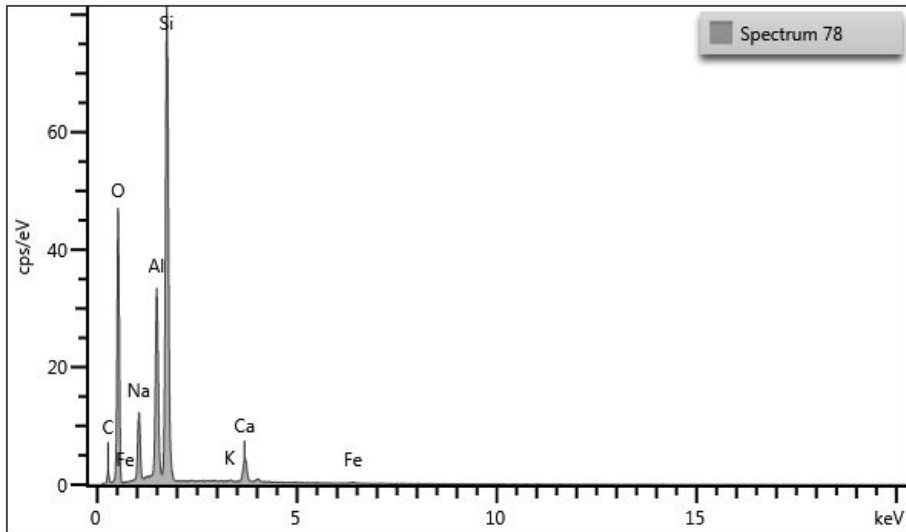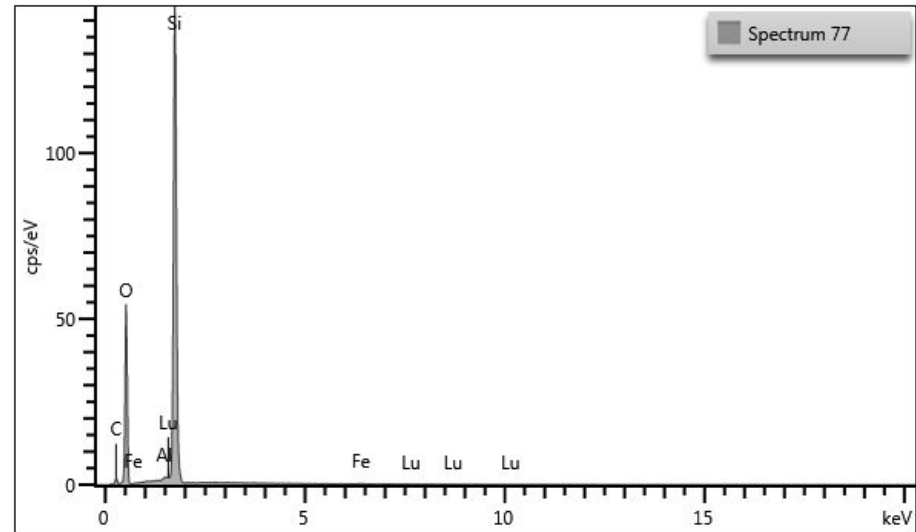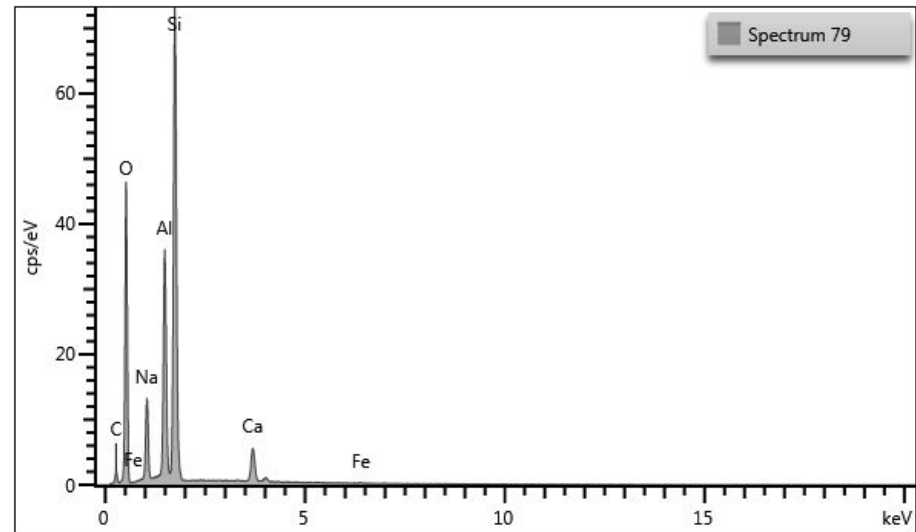

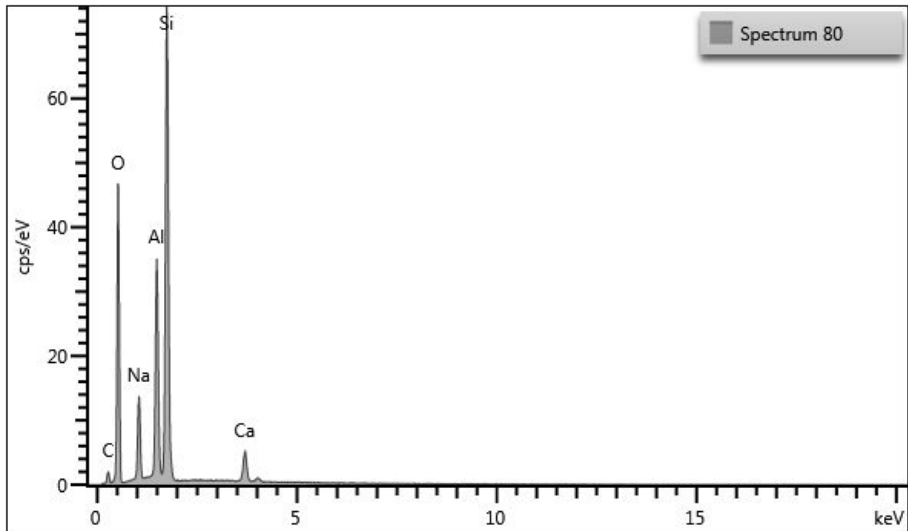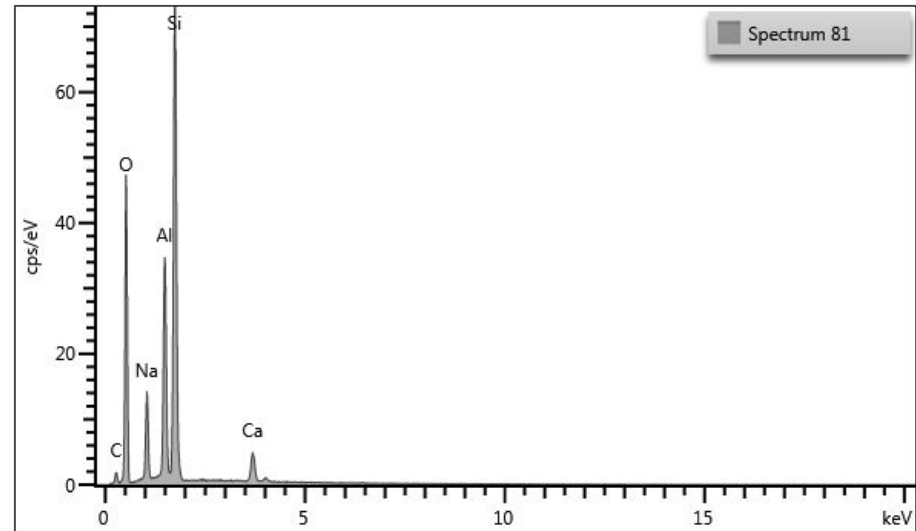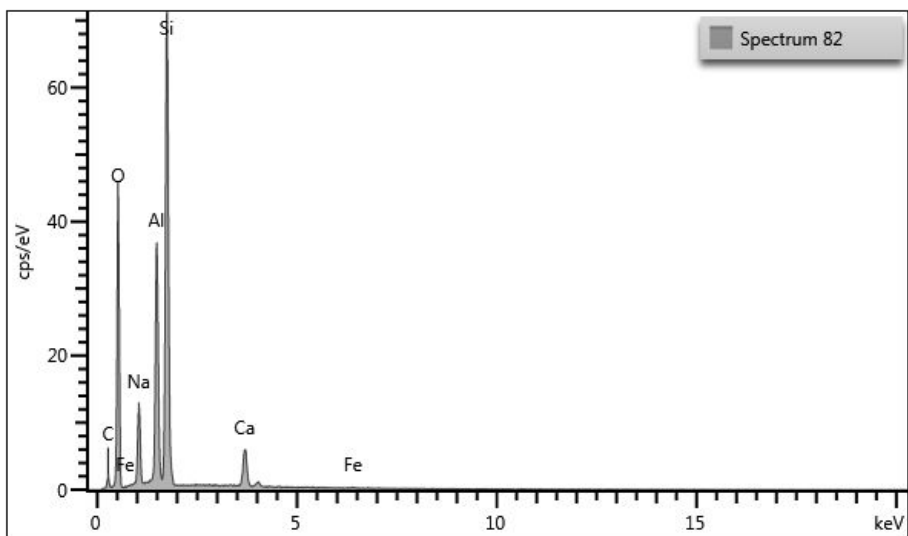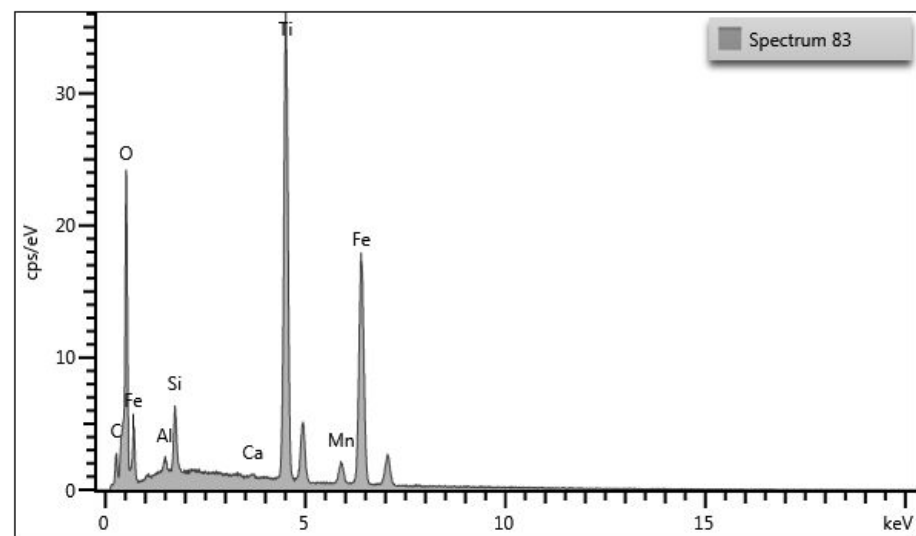



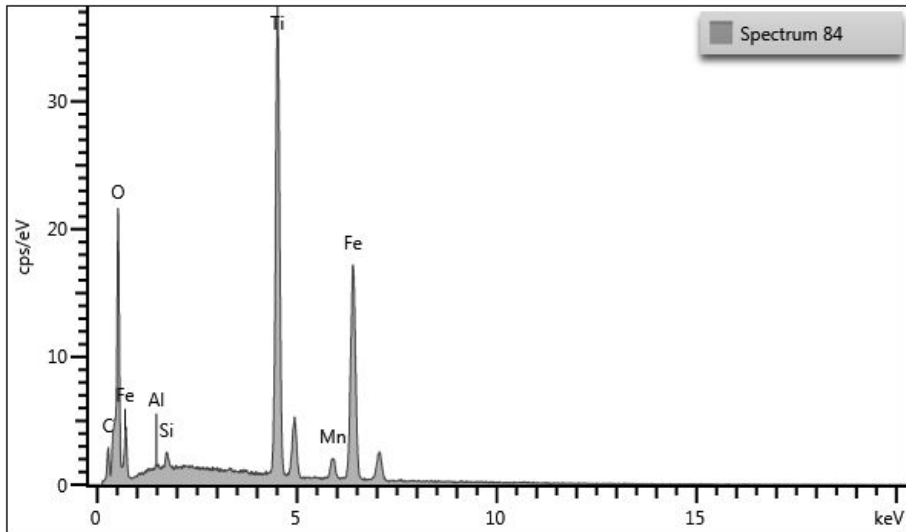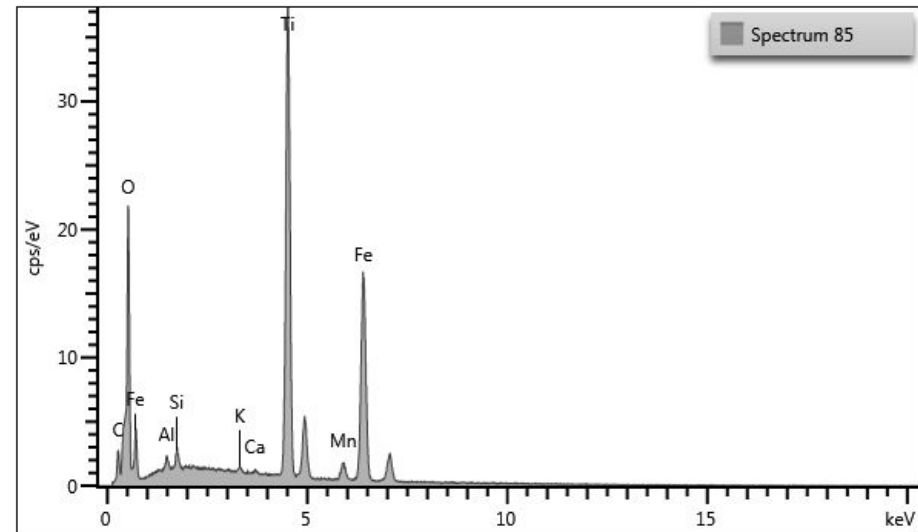

Electron Image 9

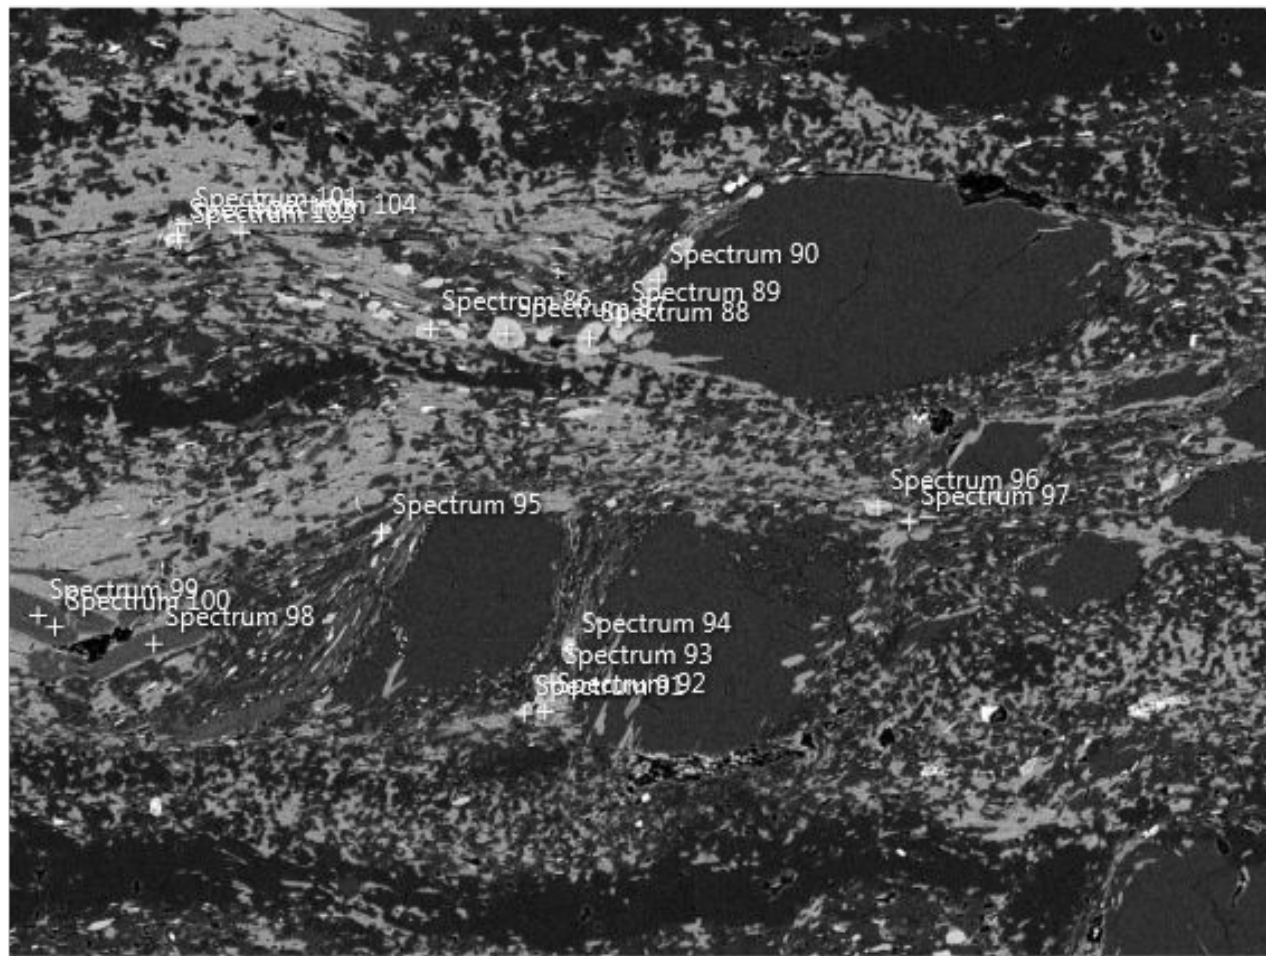

250µm

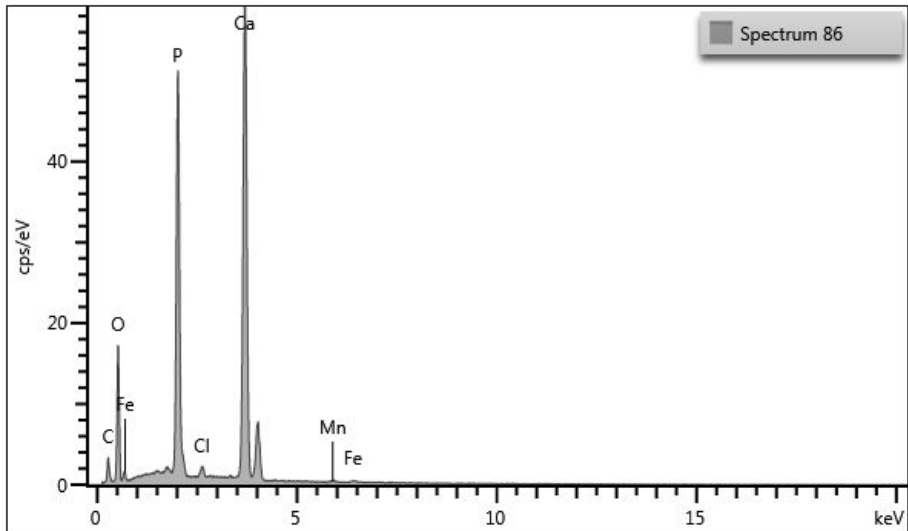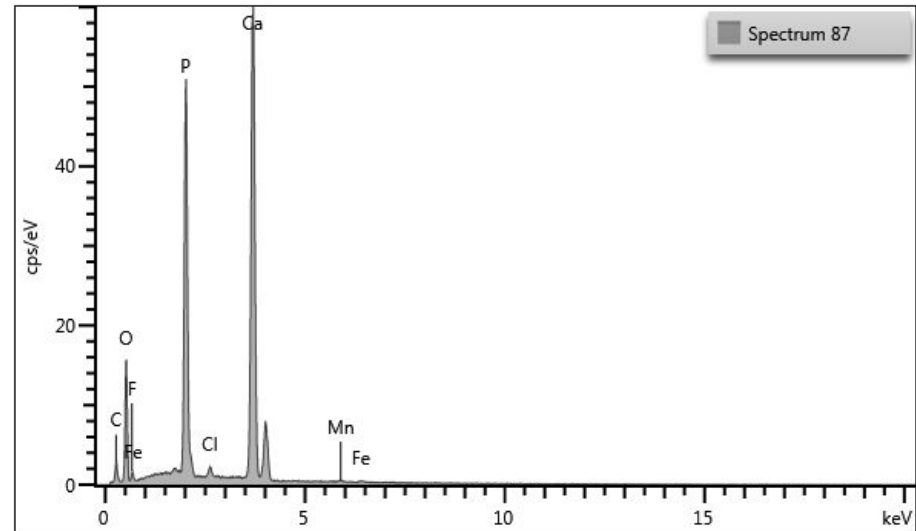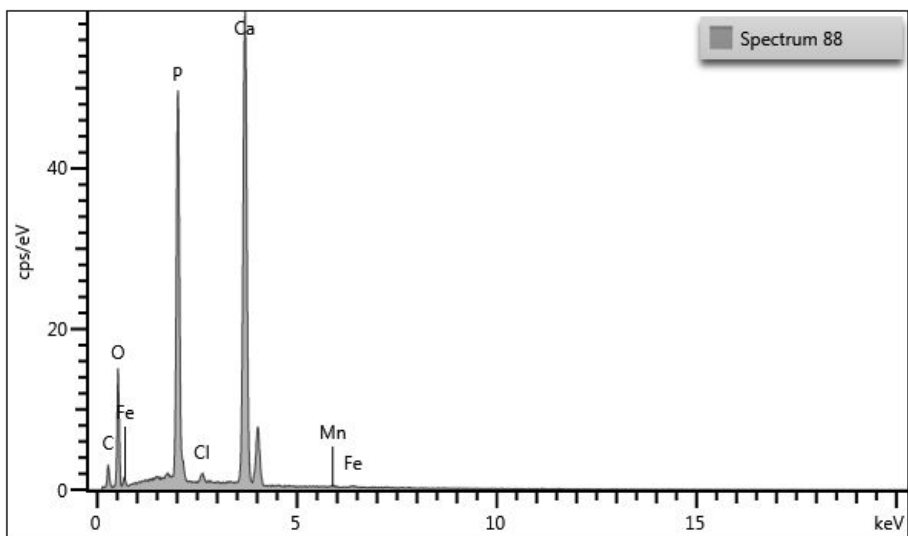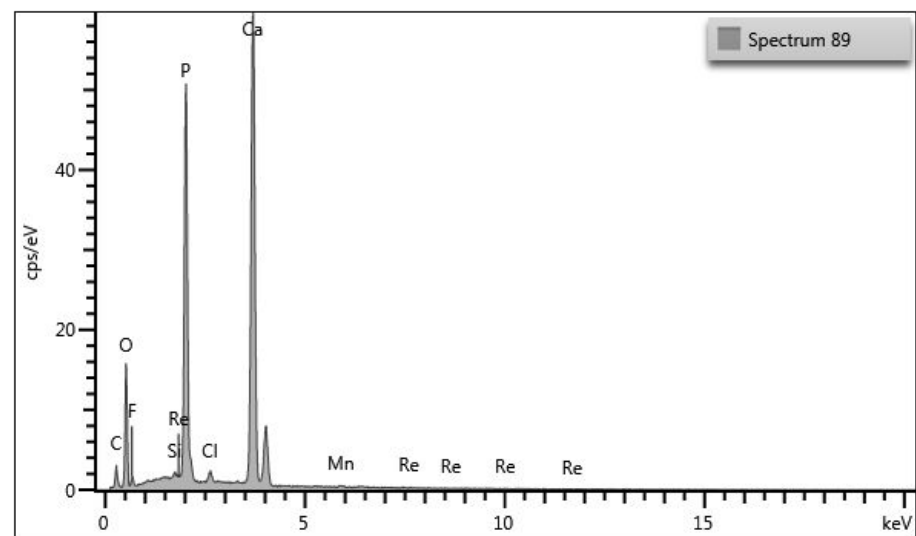

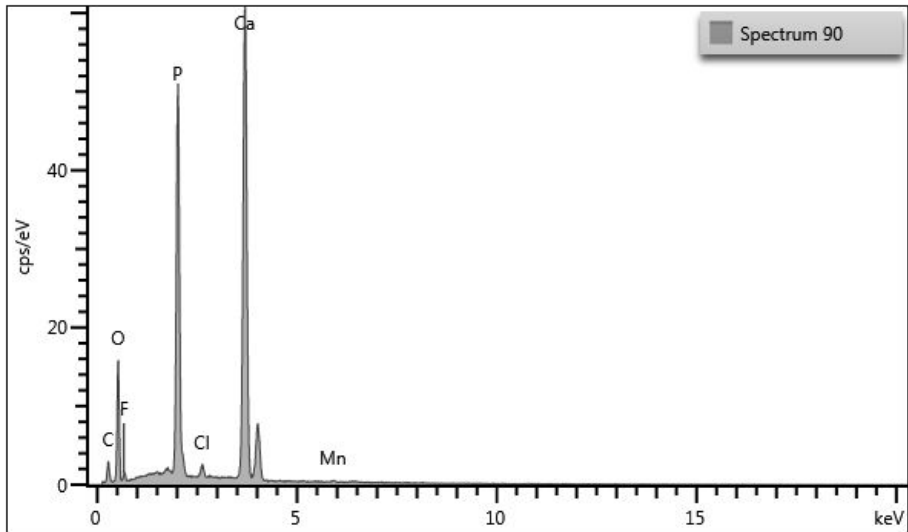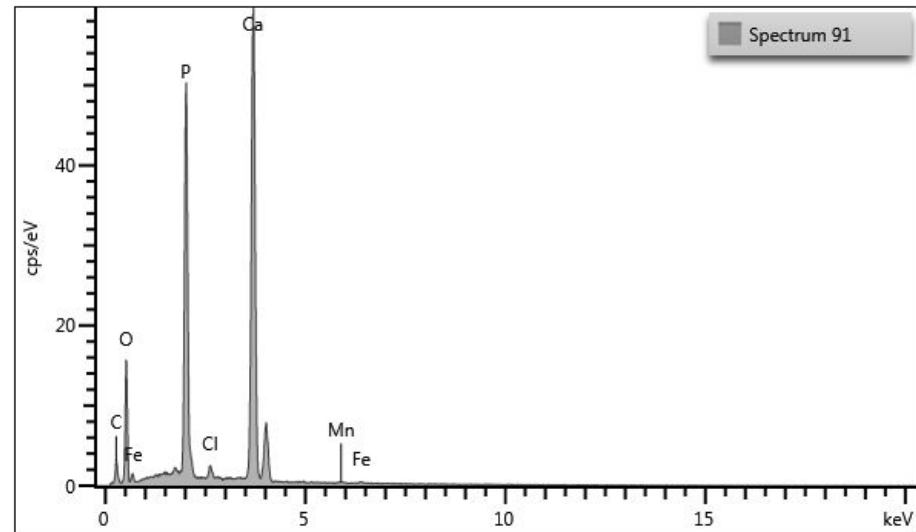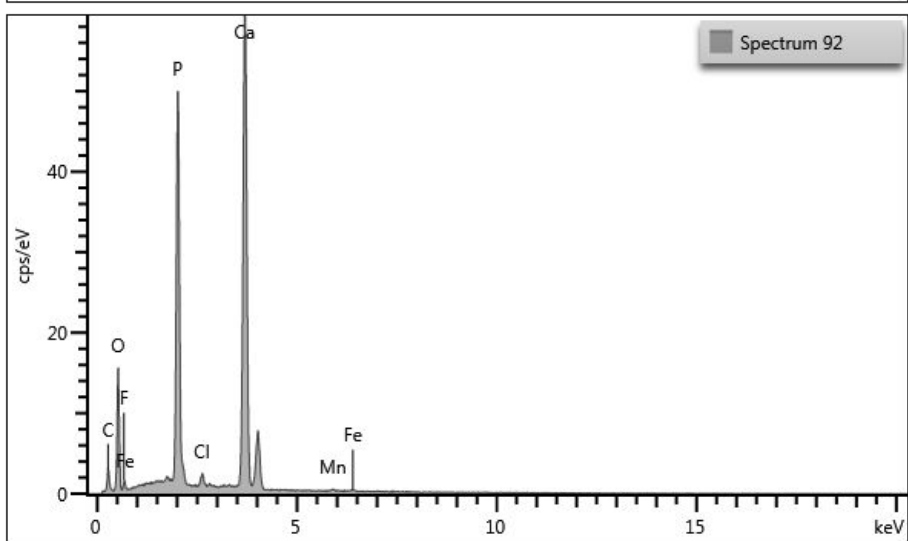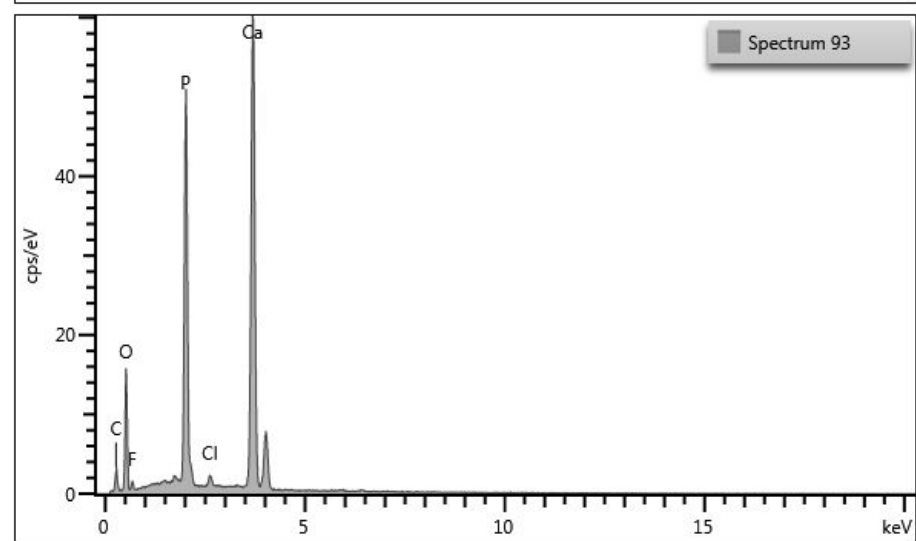

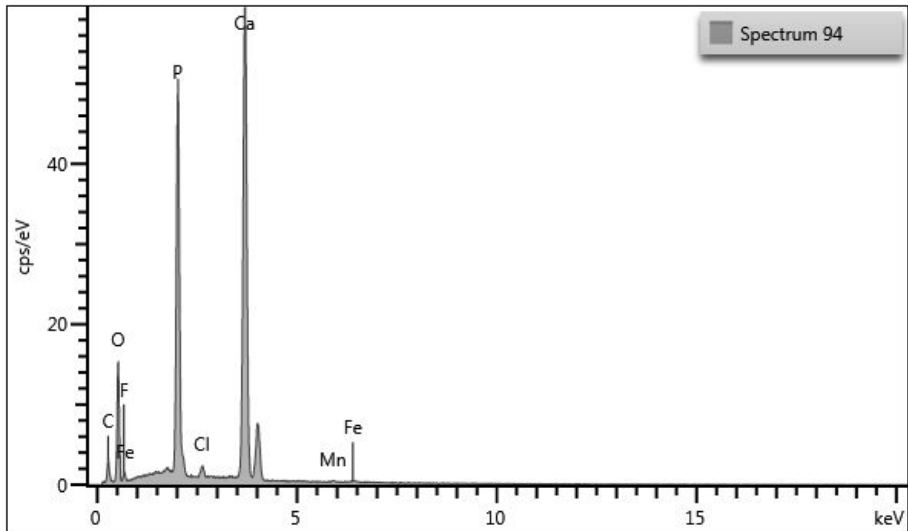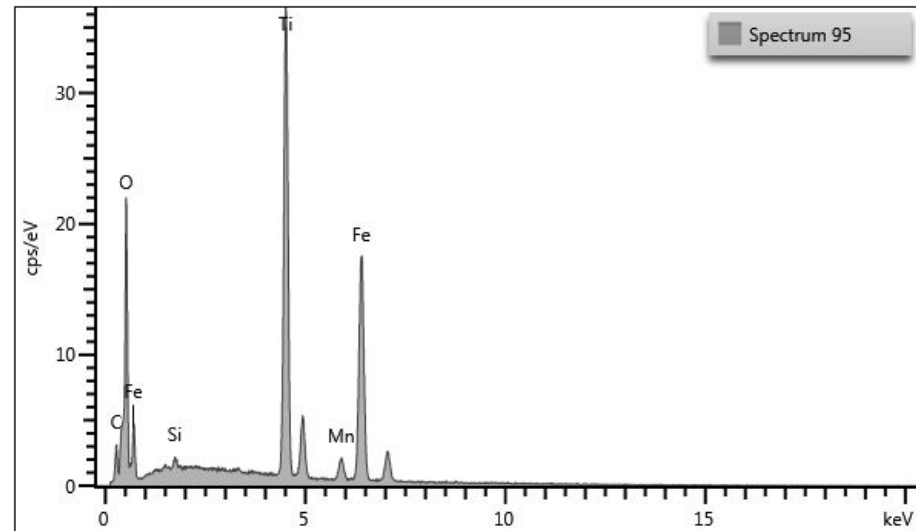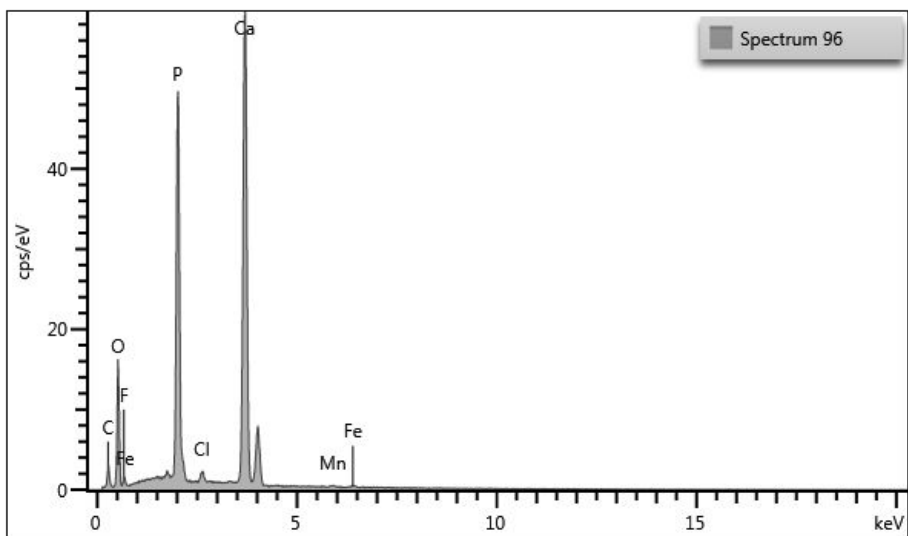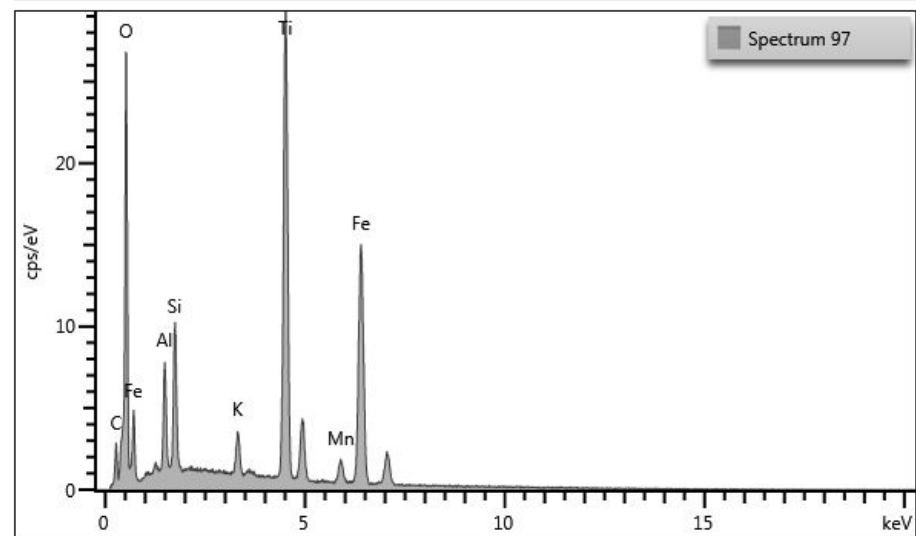

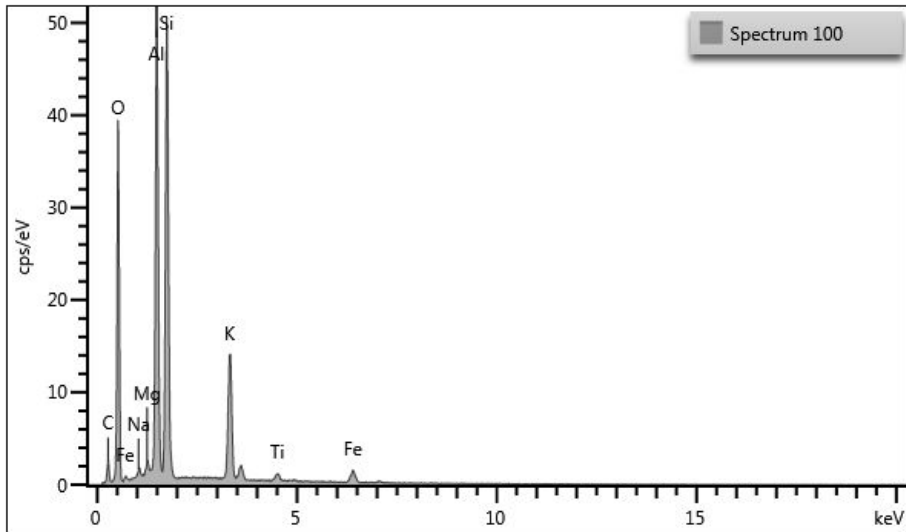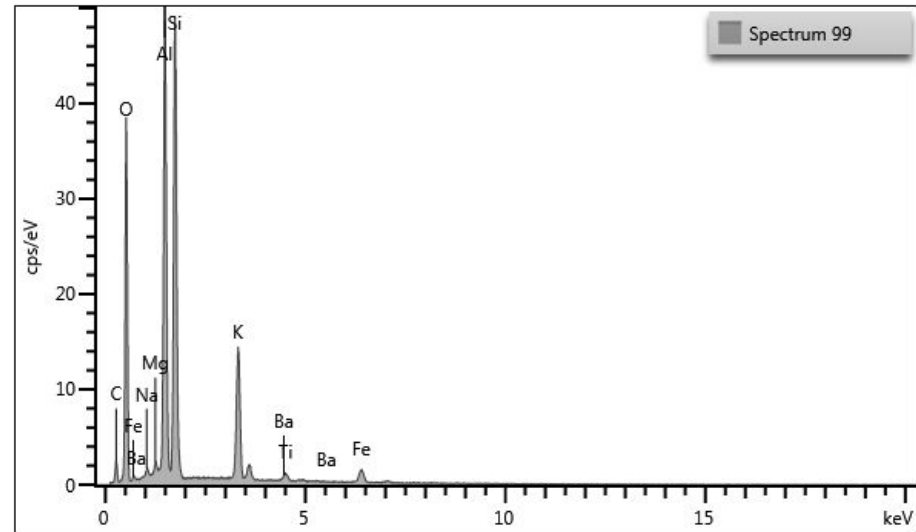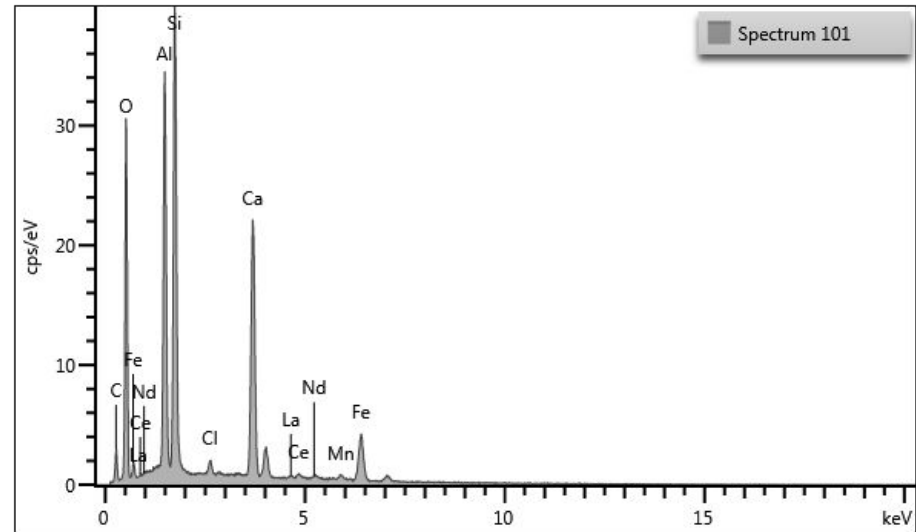

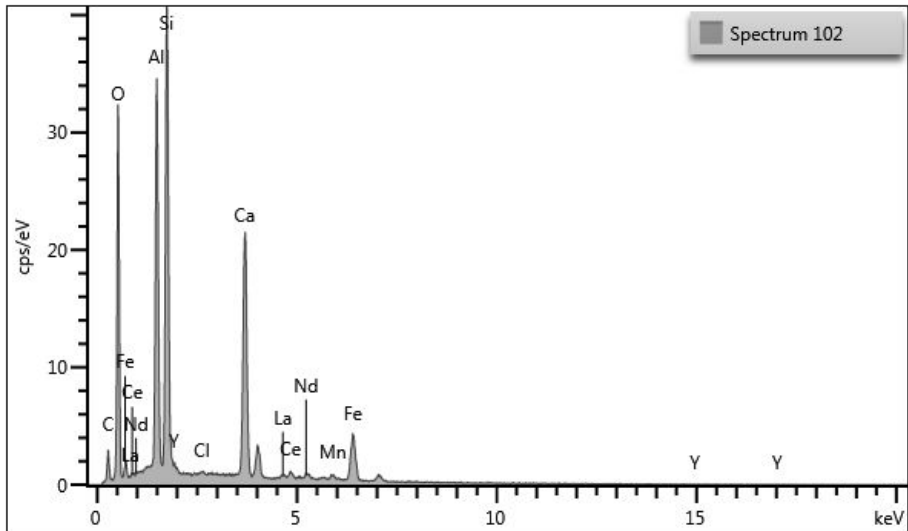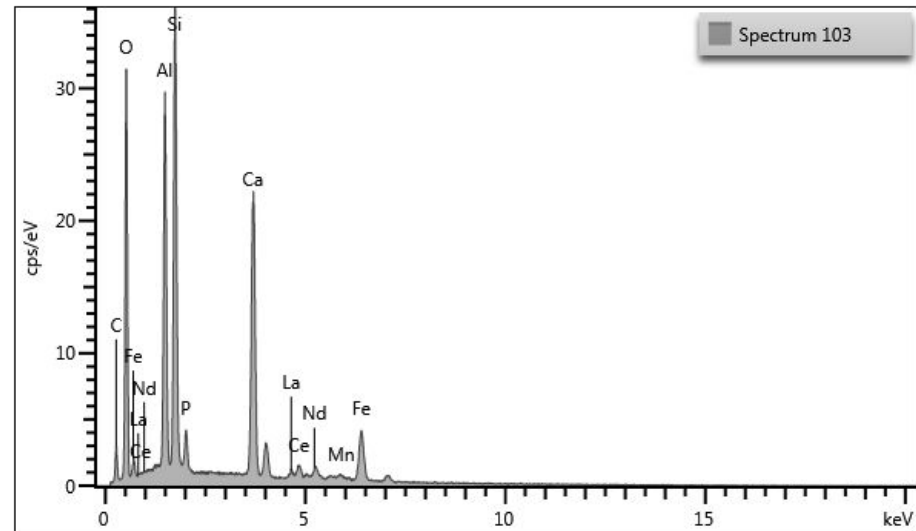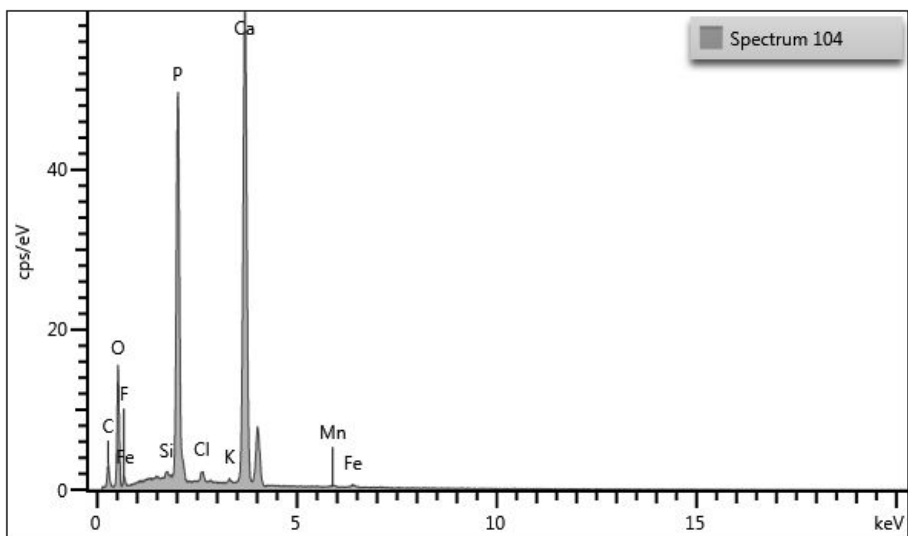

Electron Image 10

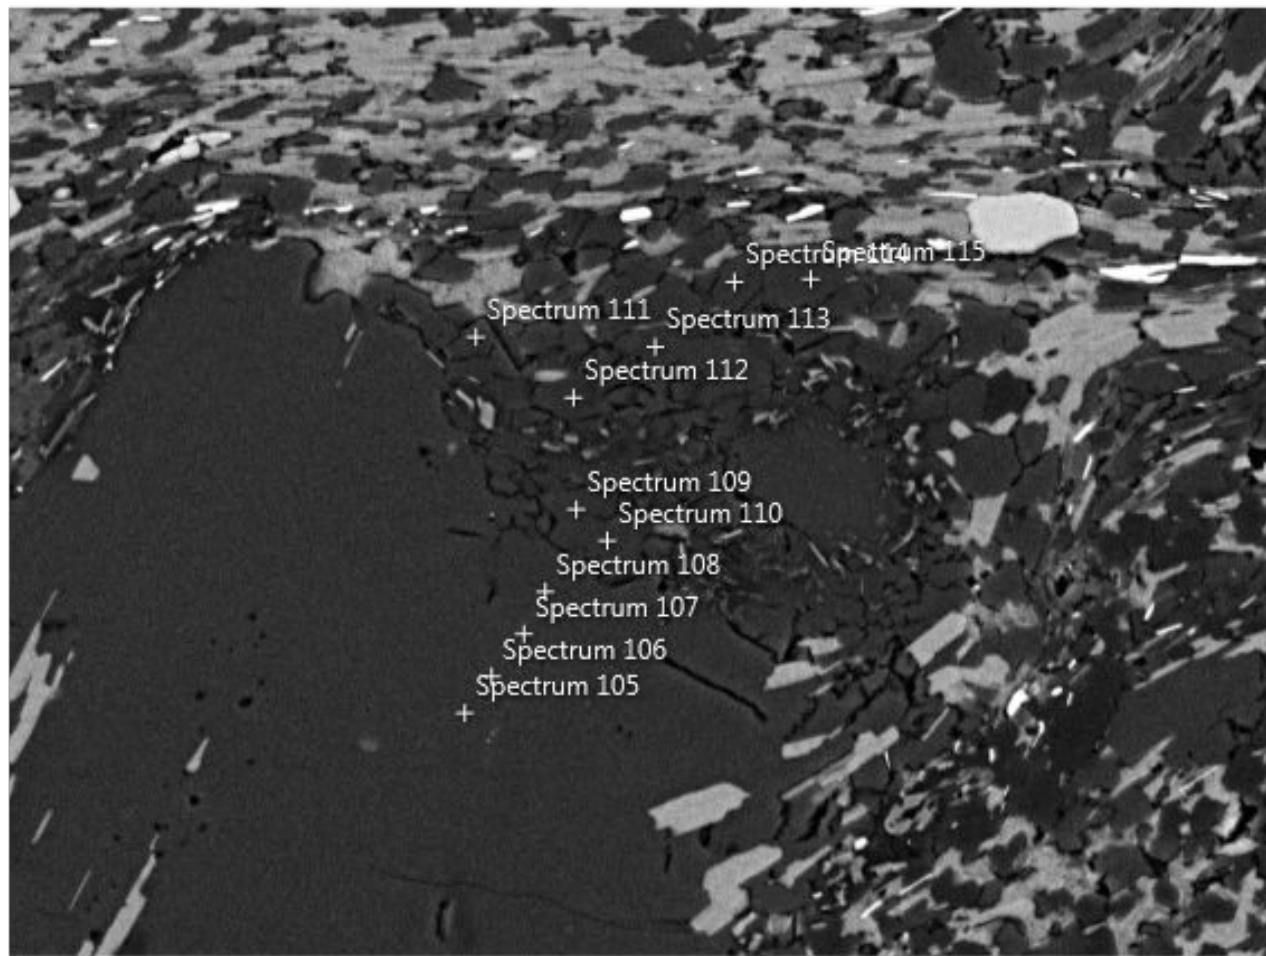

50μm



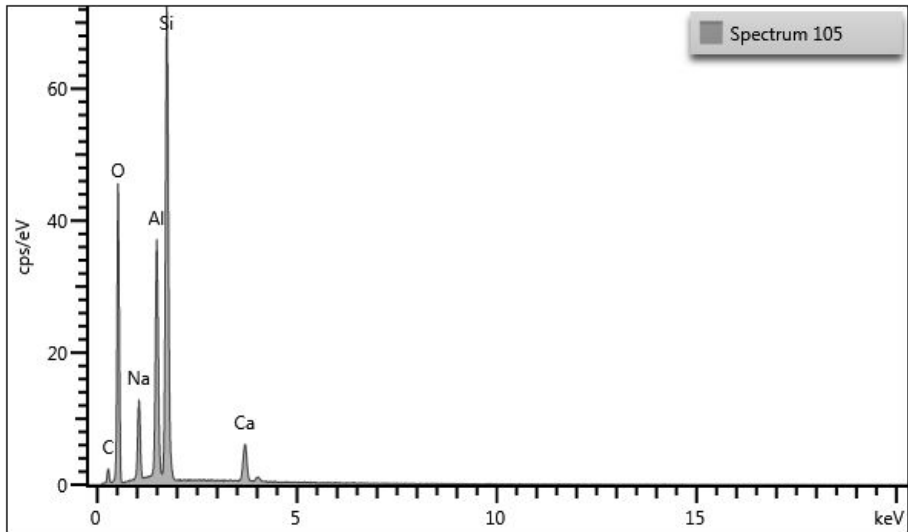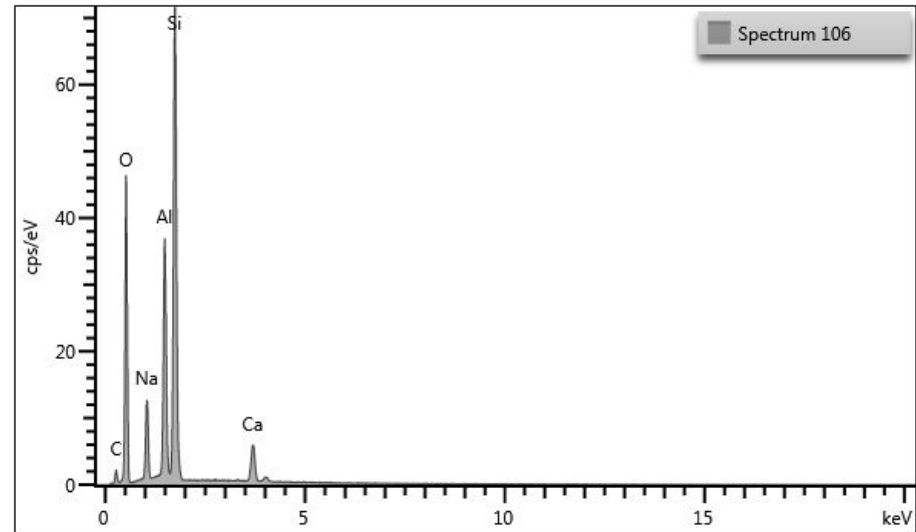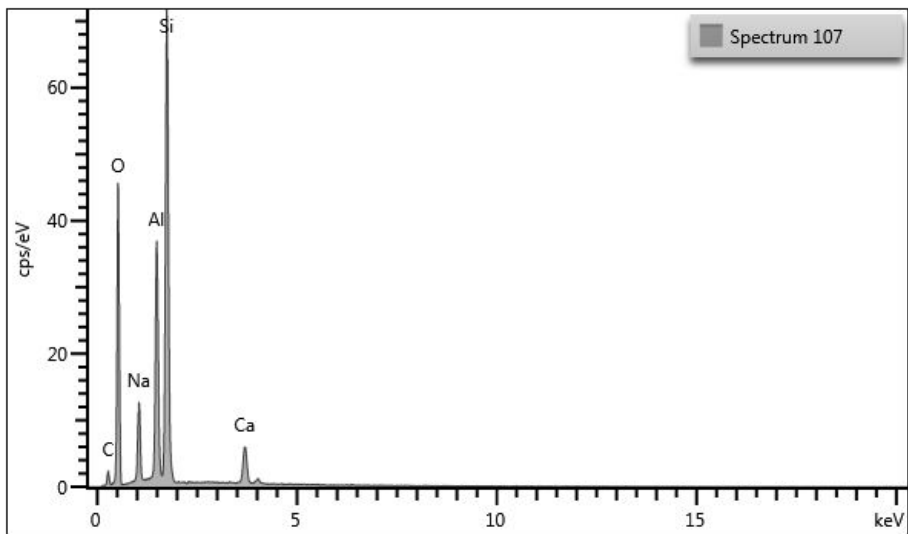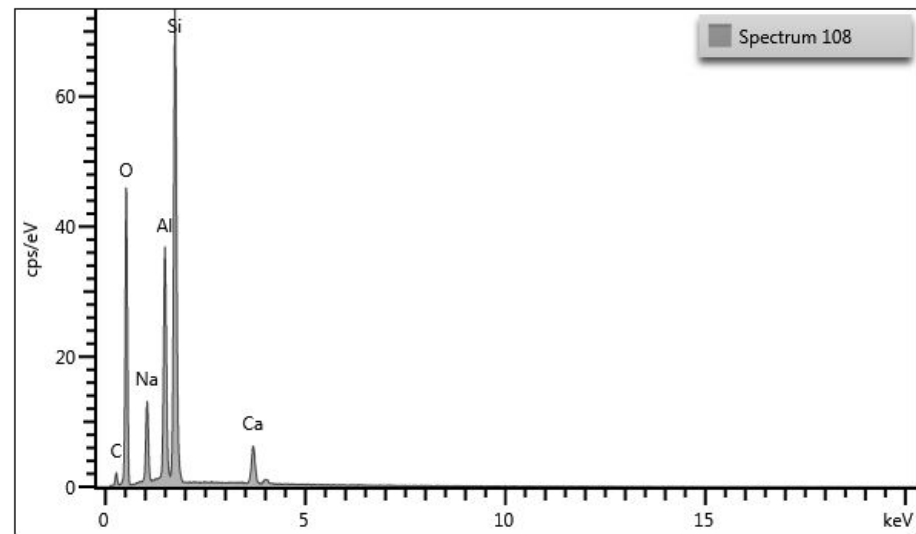

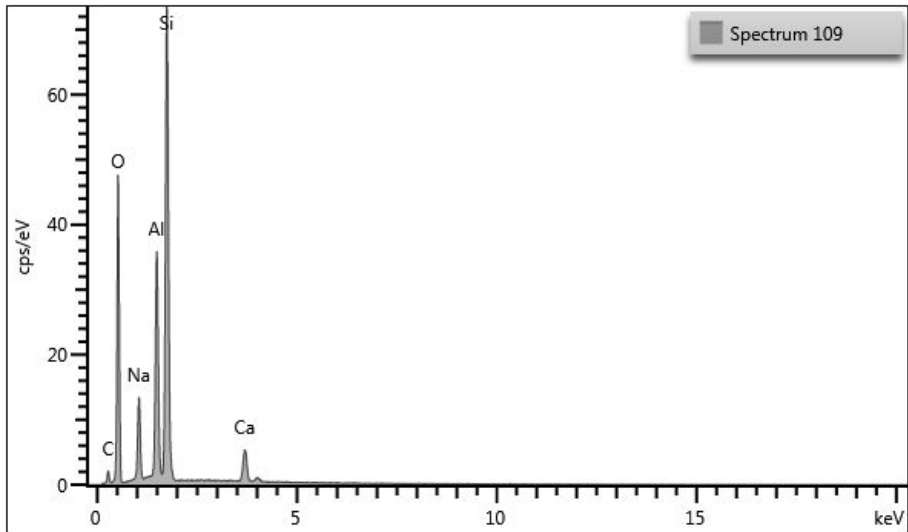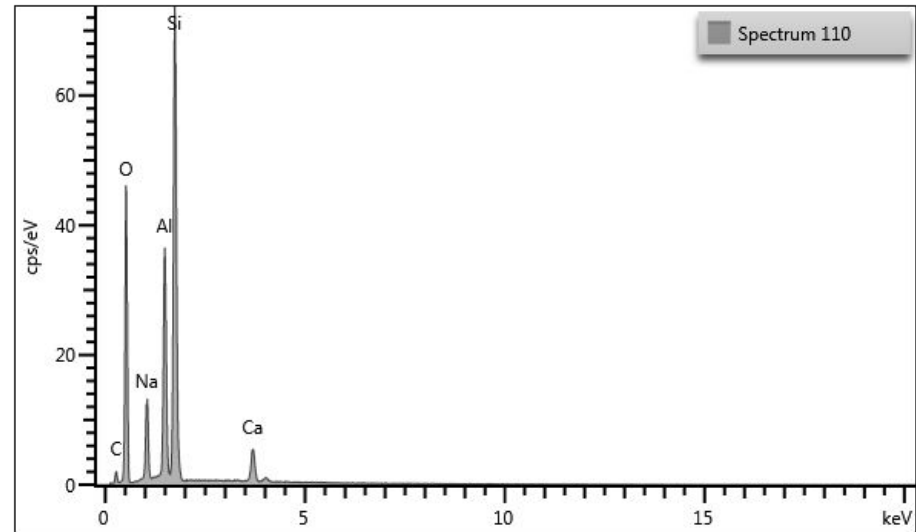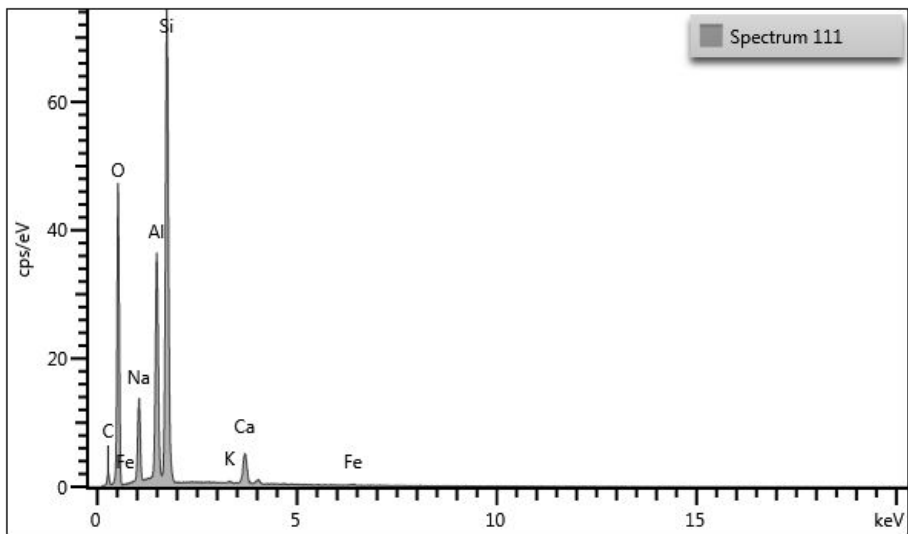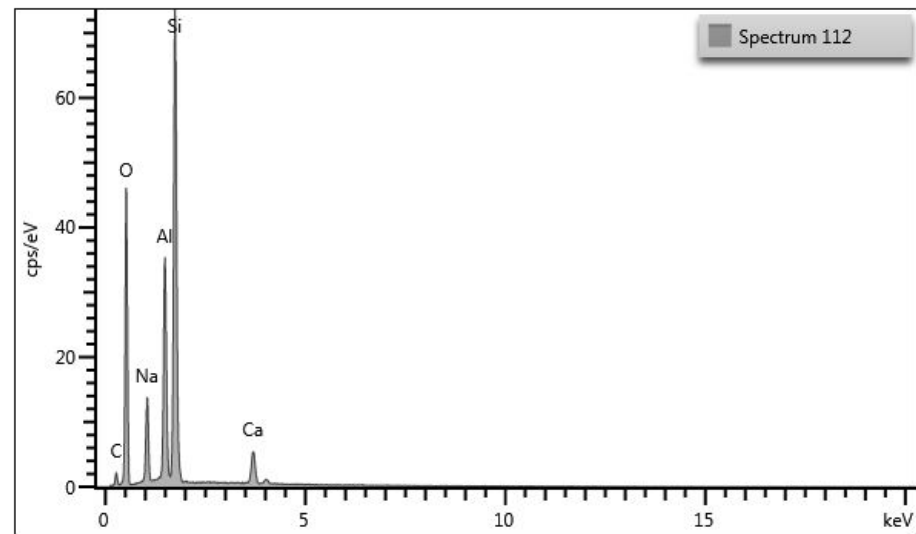

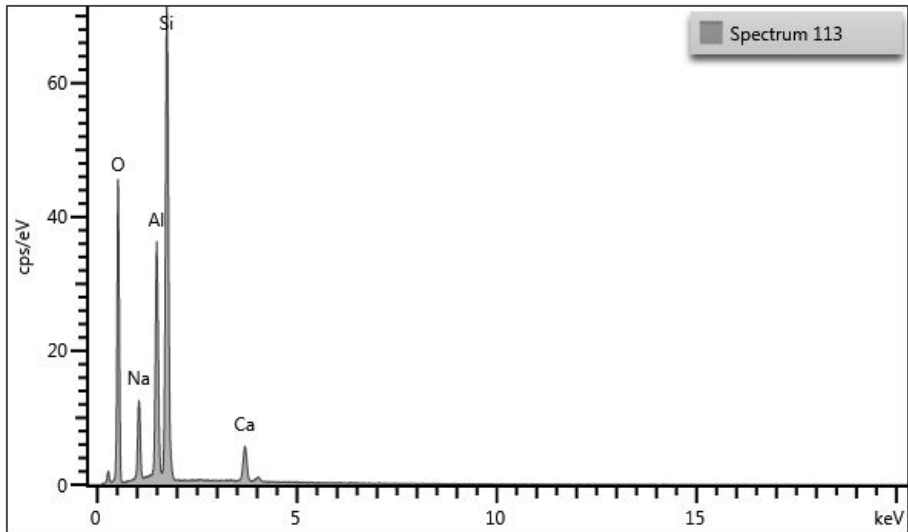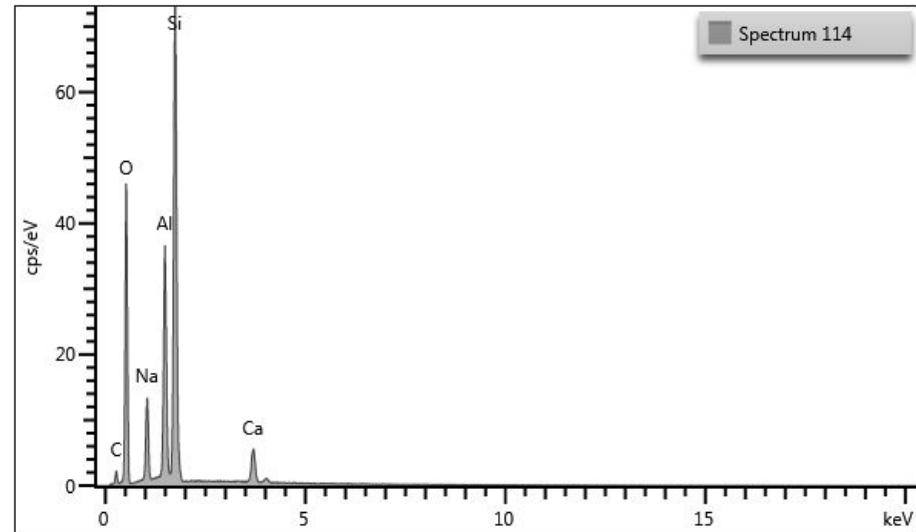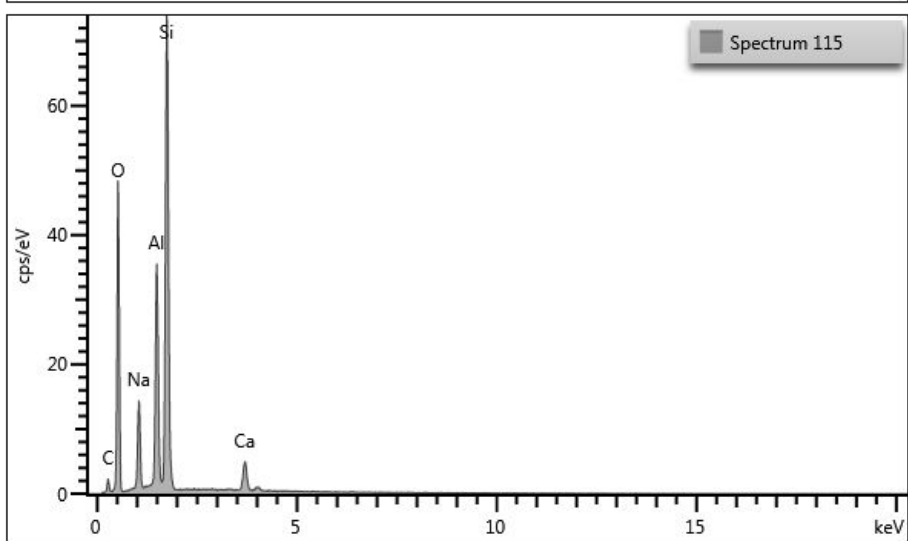

Electron Image 11

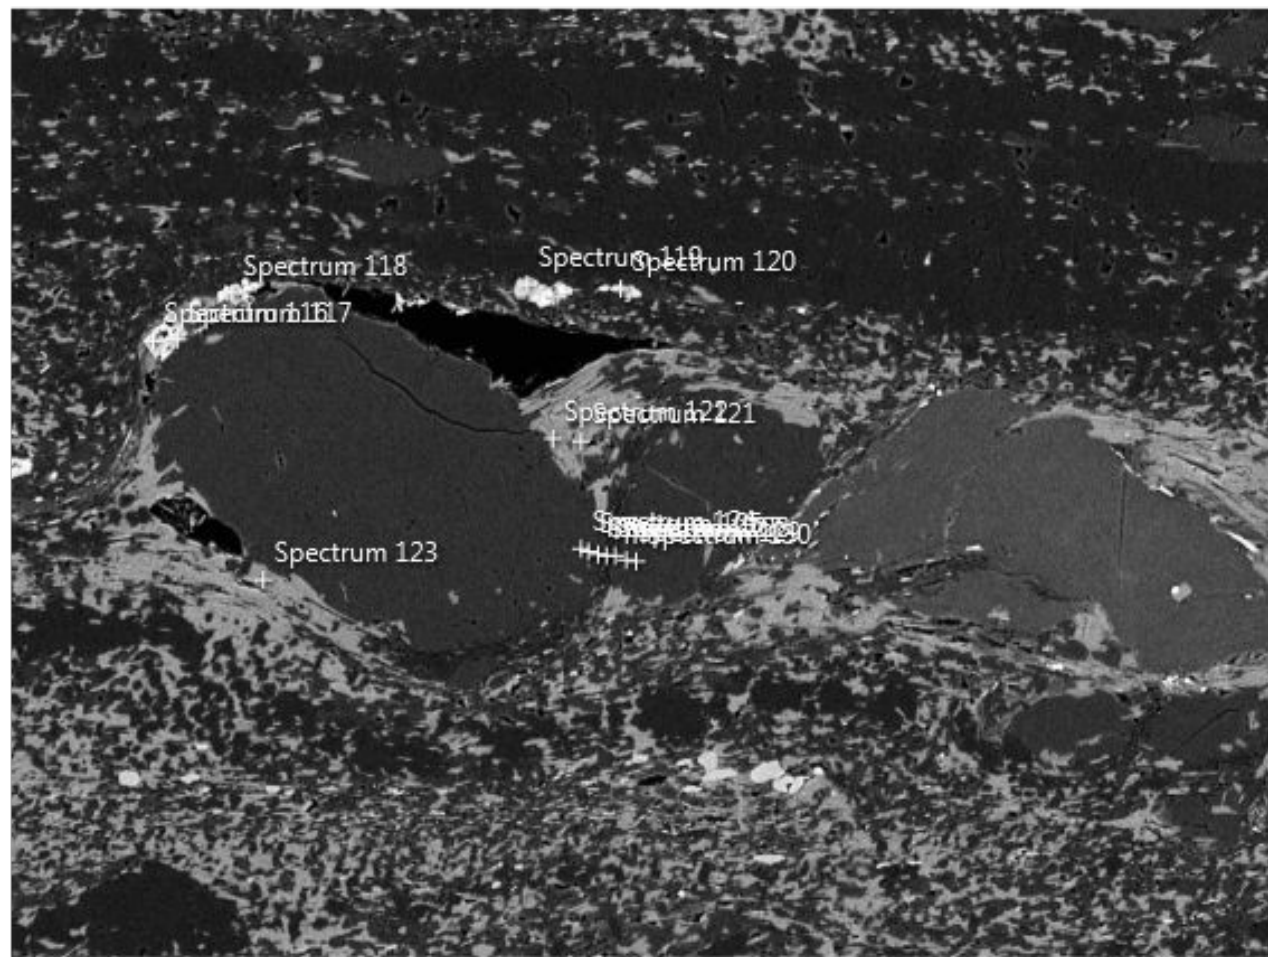

250μm

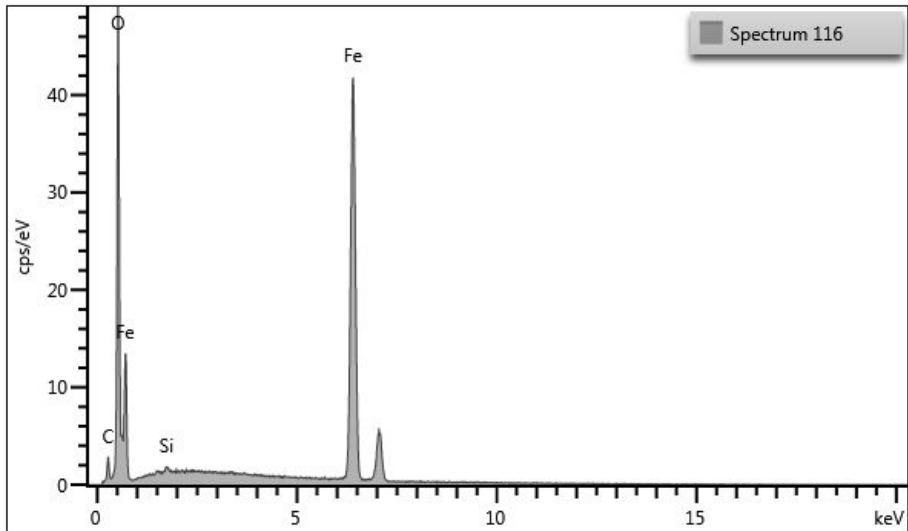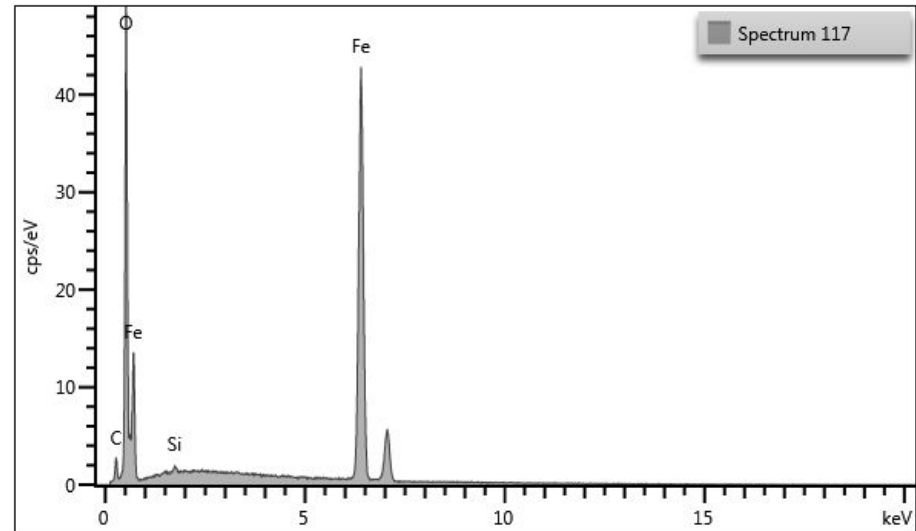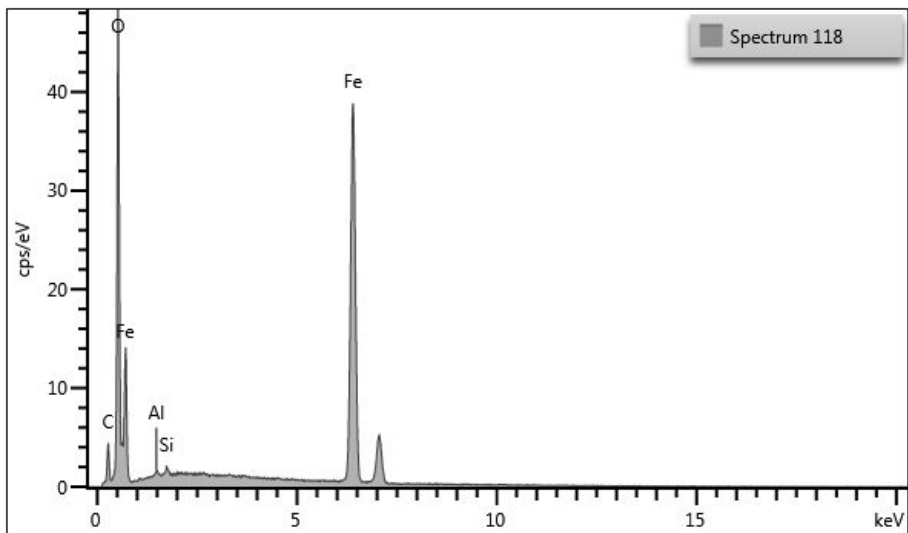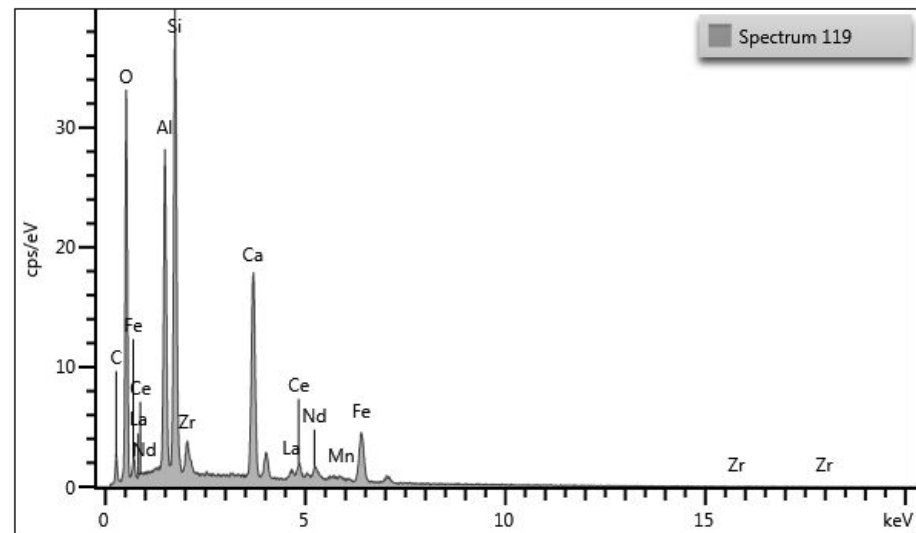

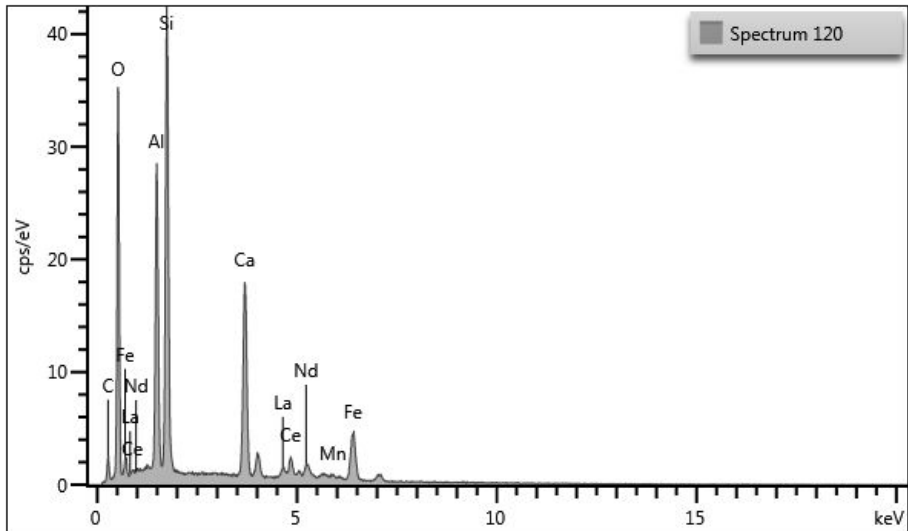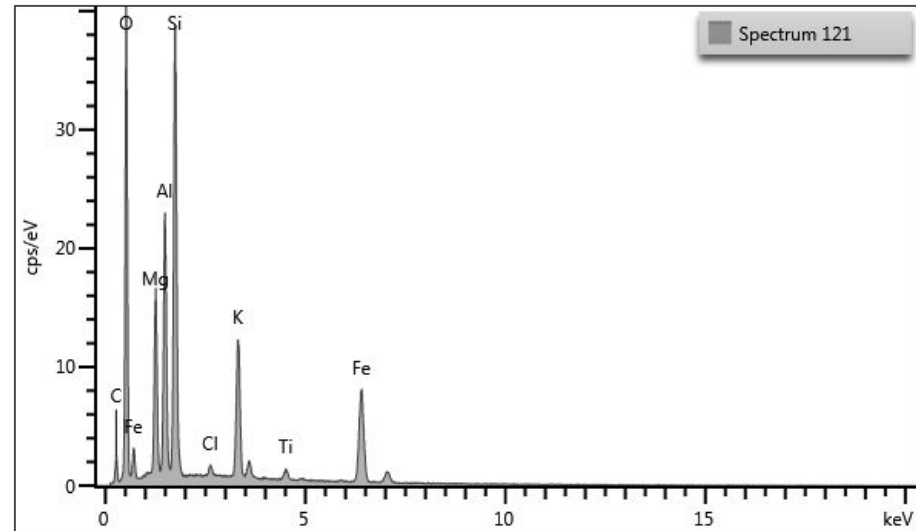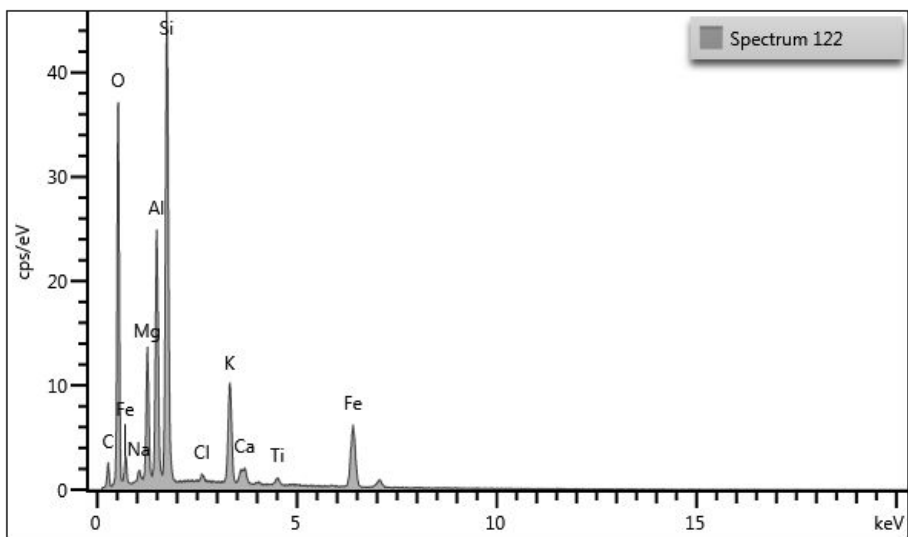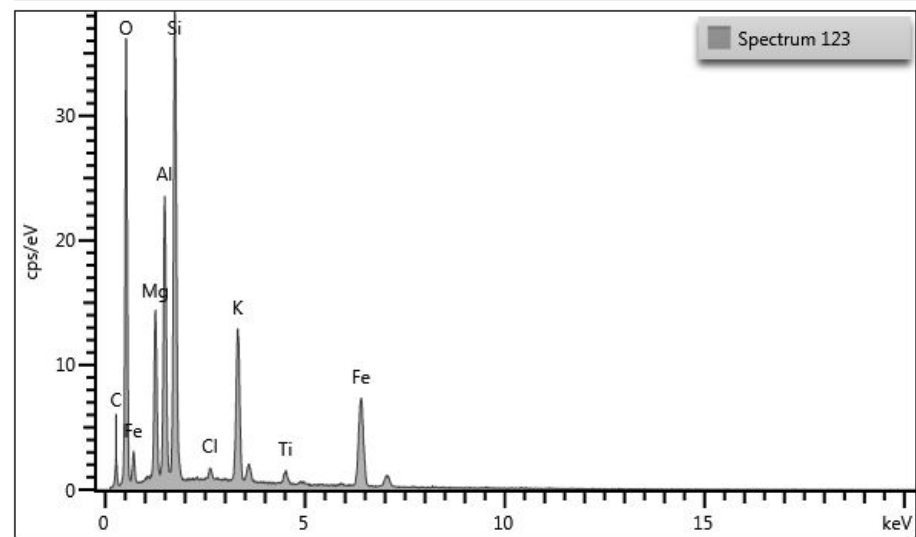

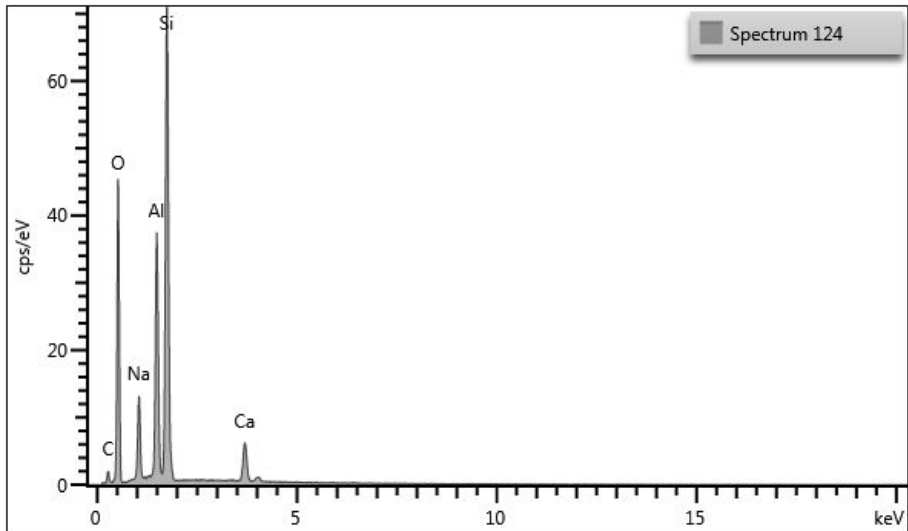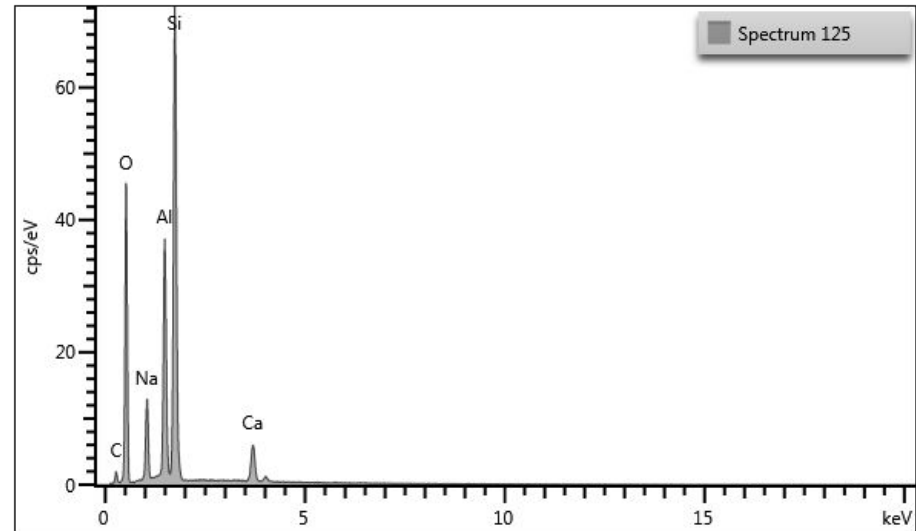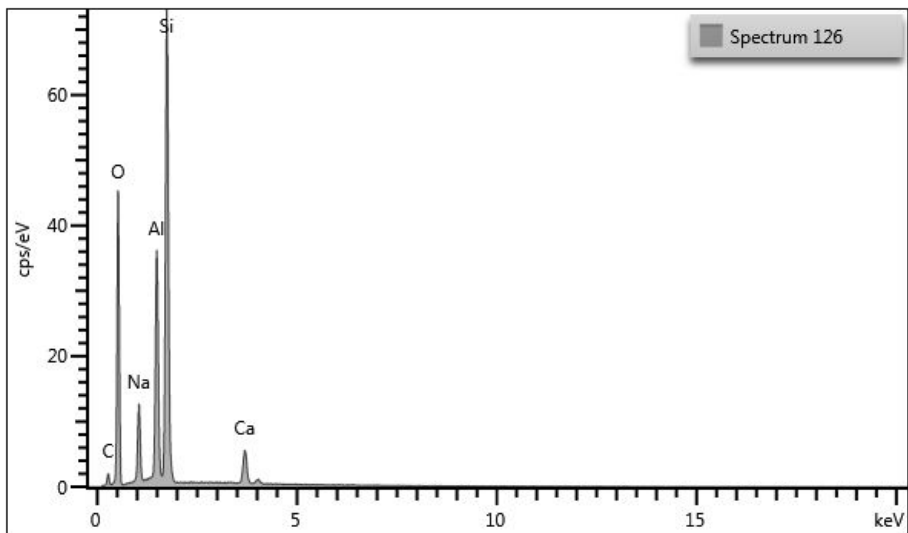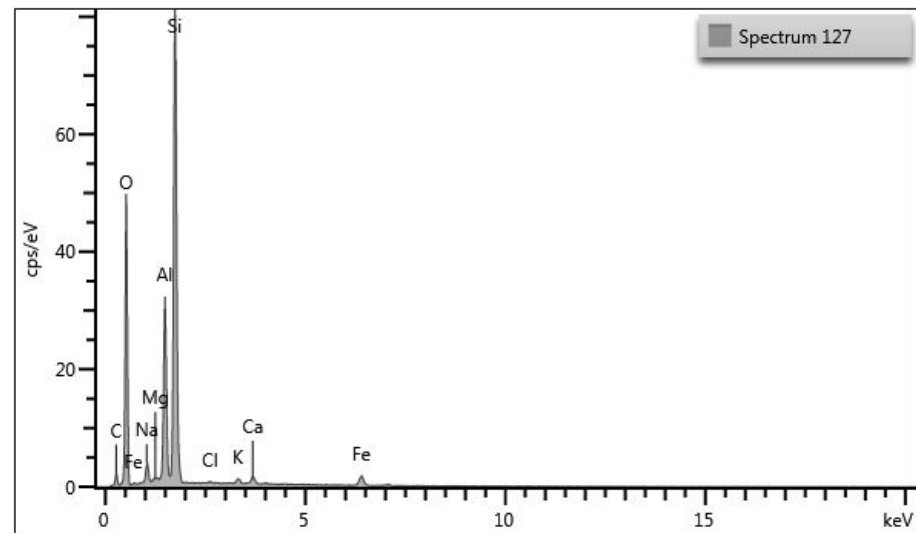

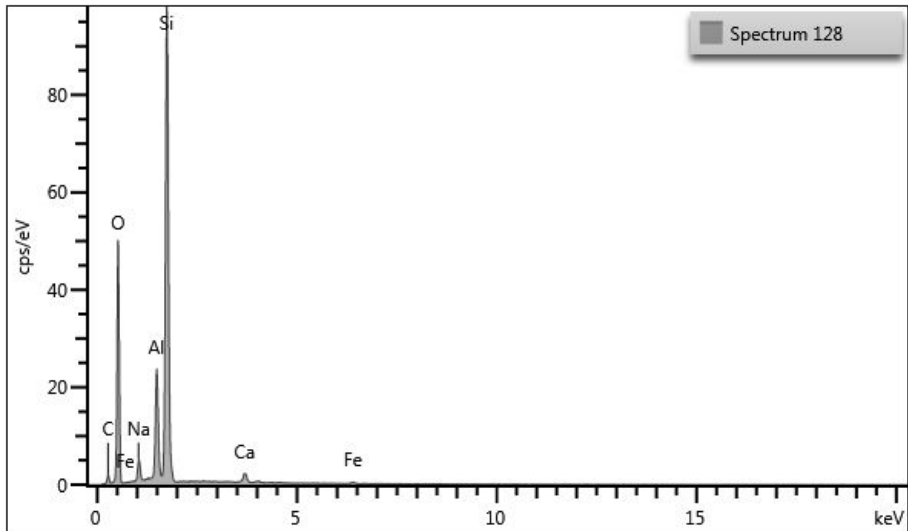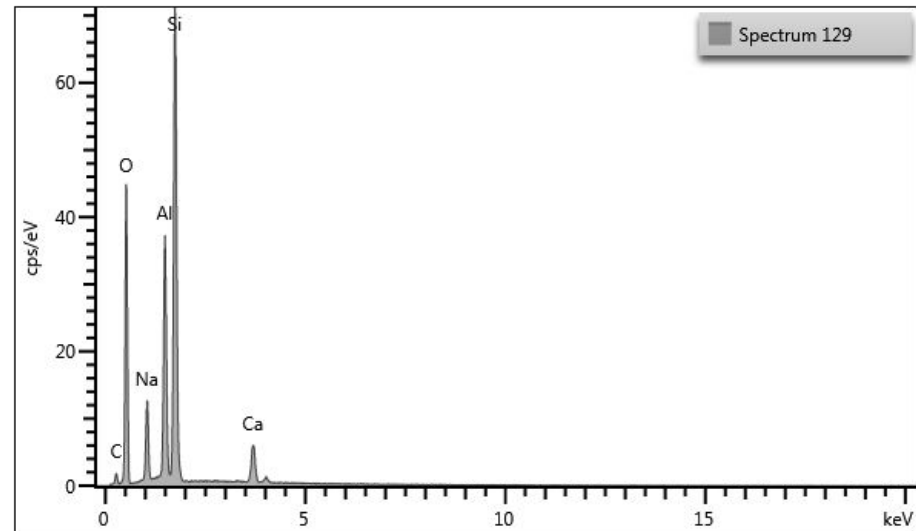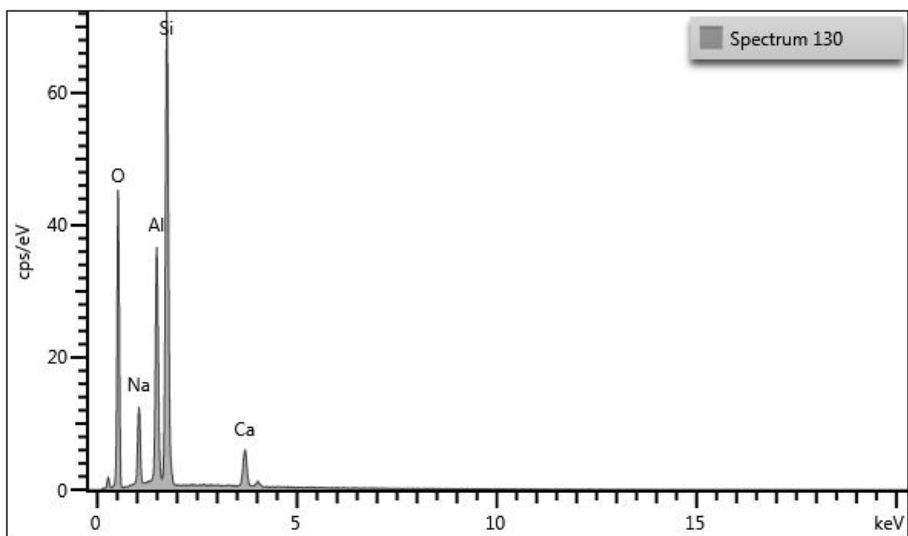



Electron Image 12

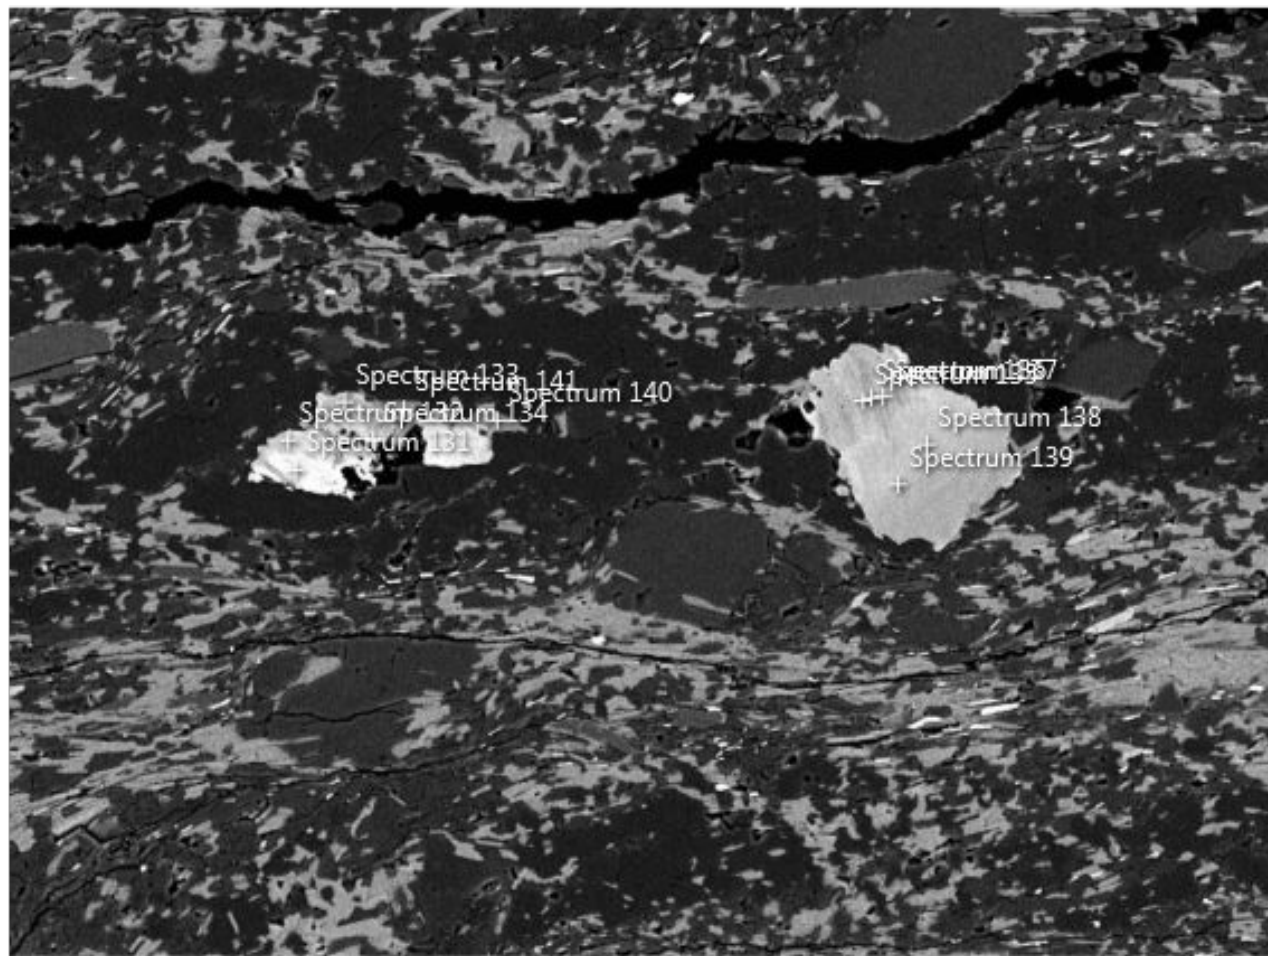

100μm

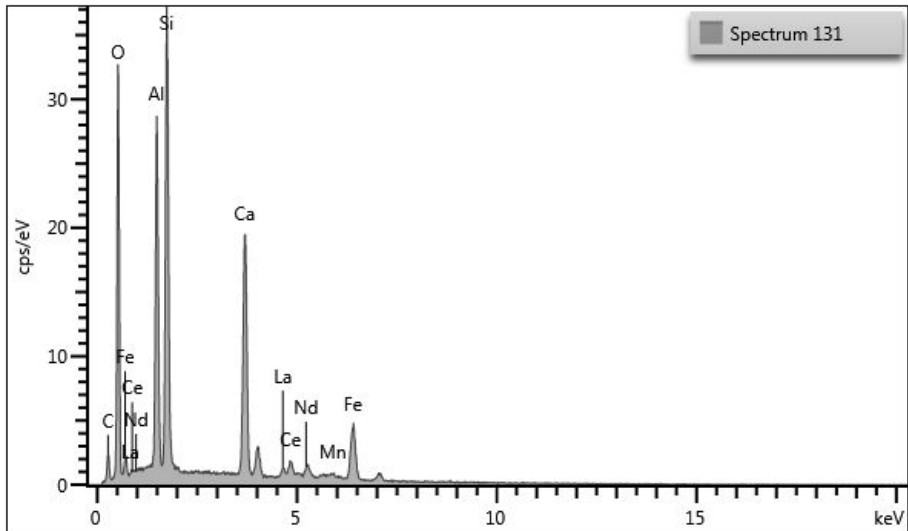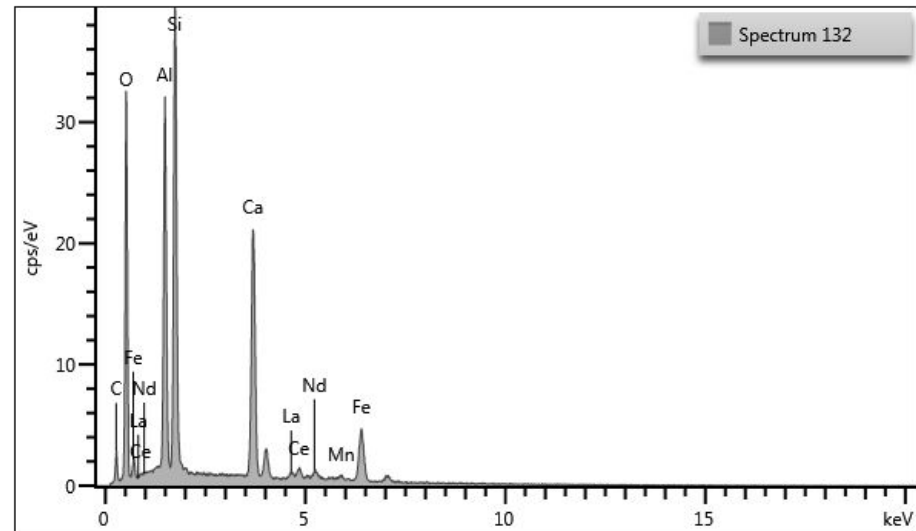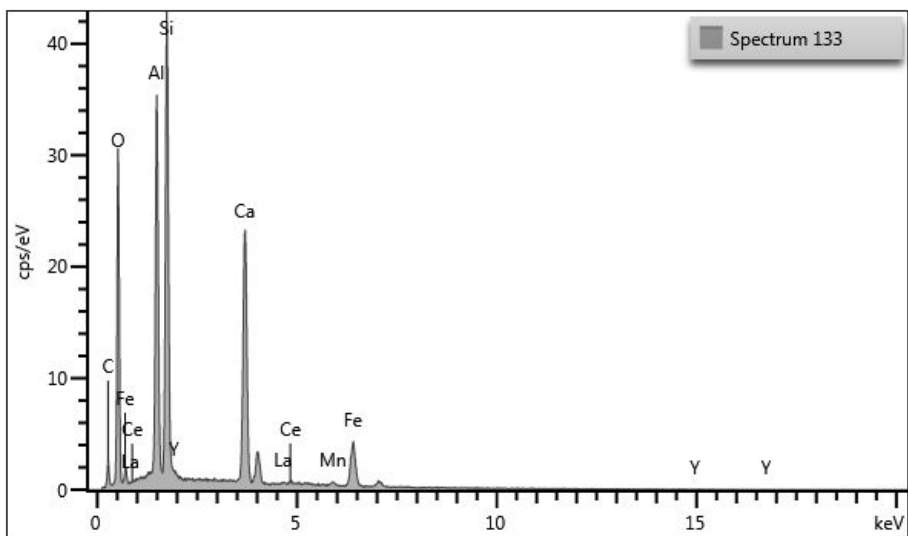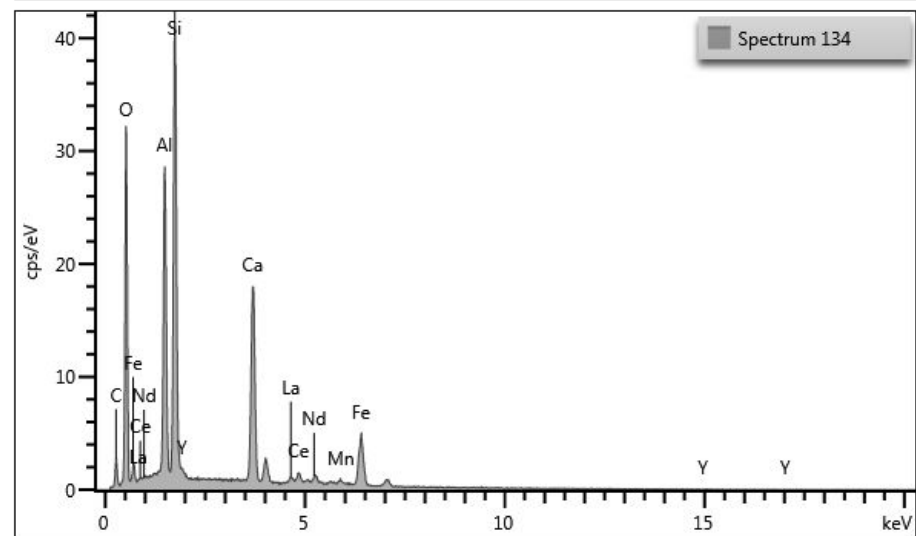

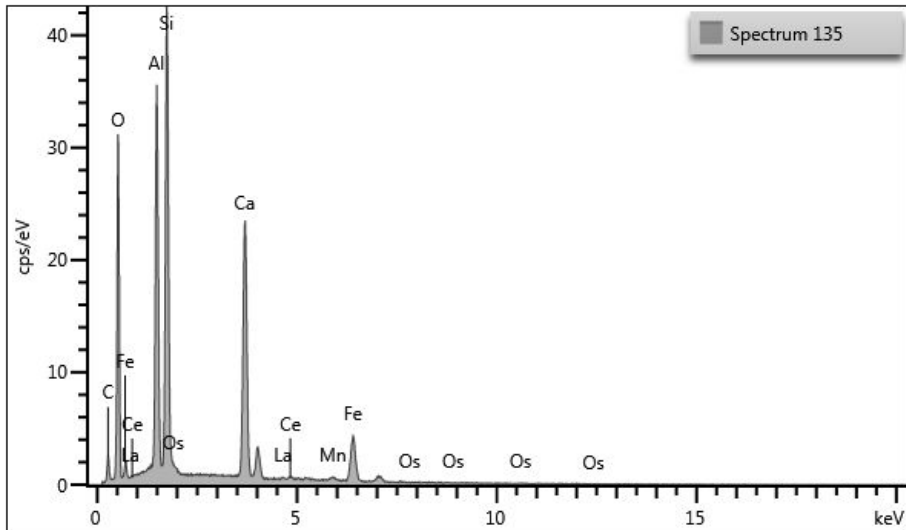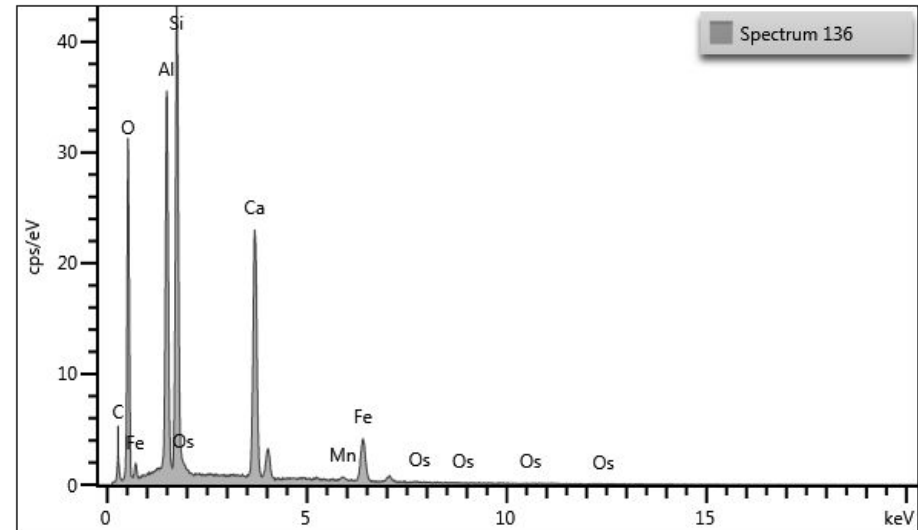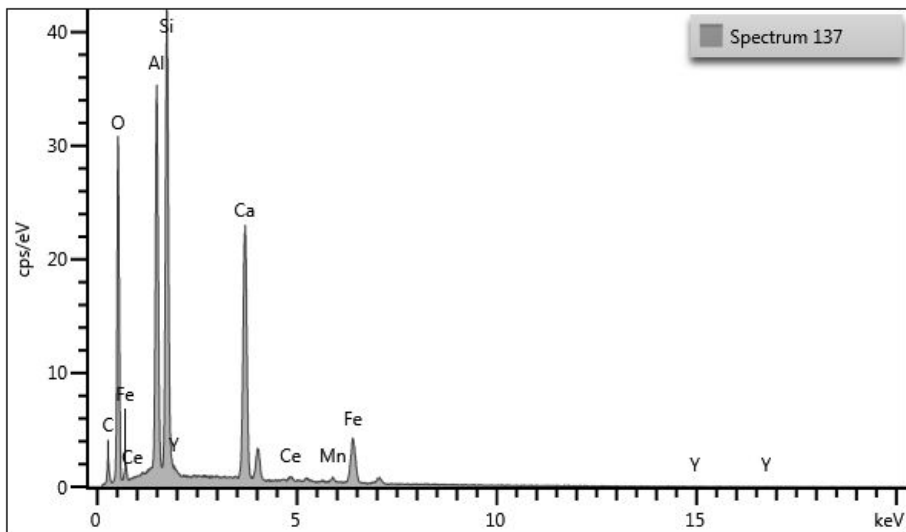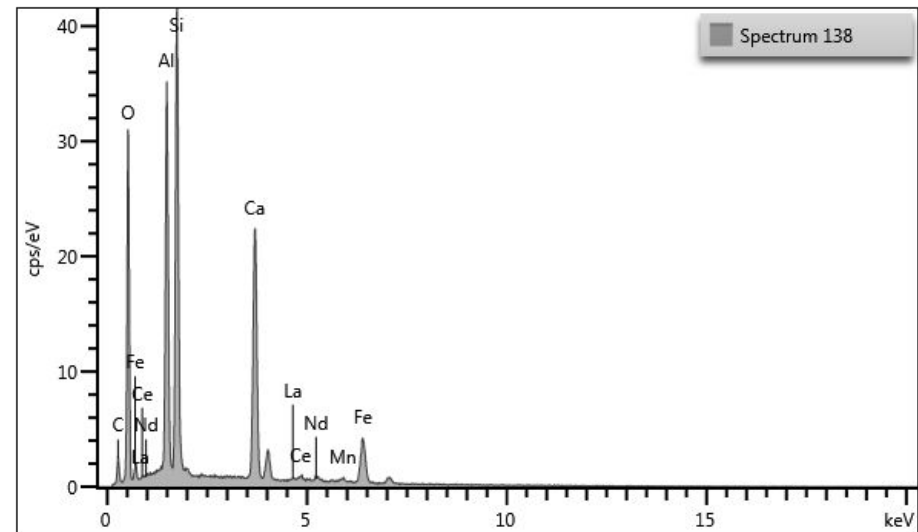

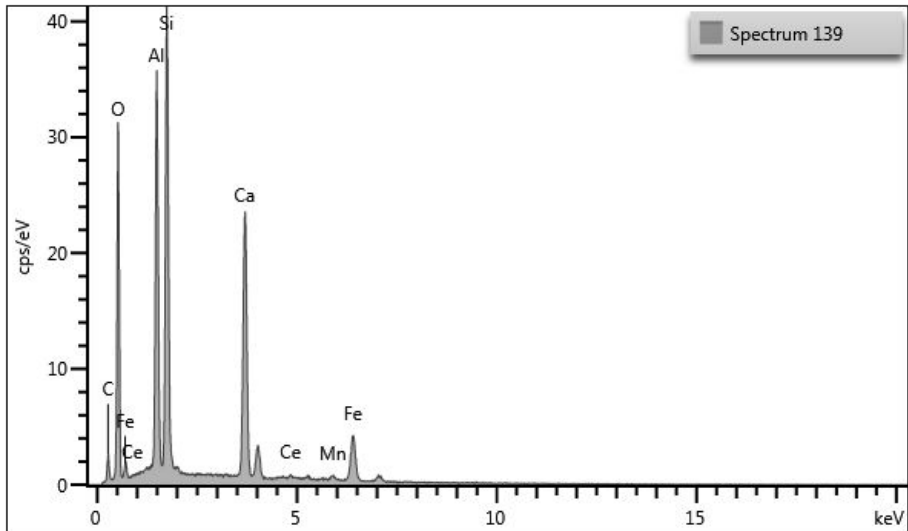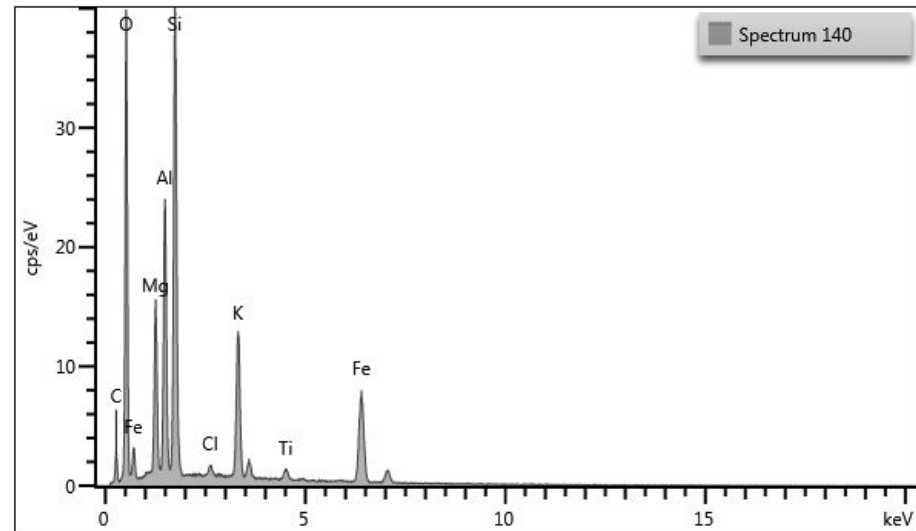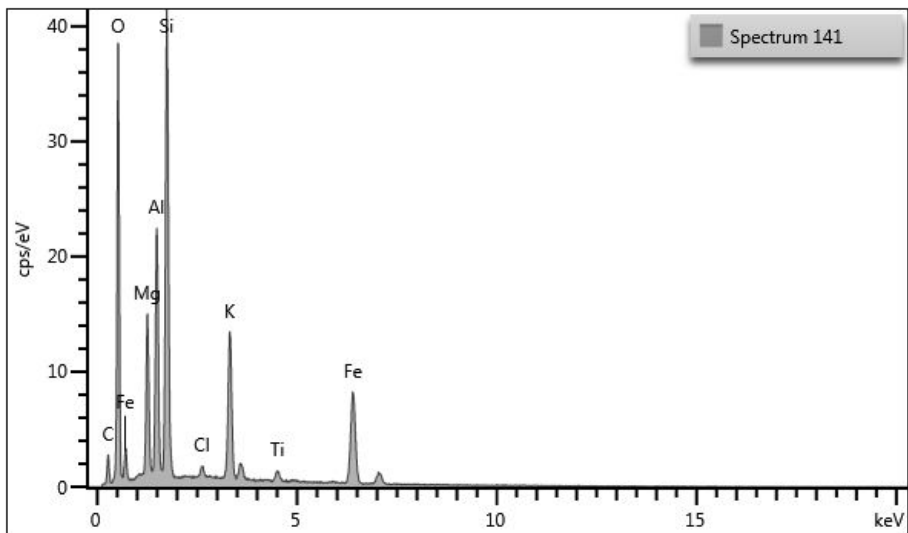

Electron Image 13

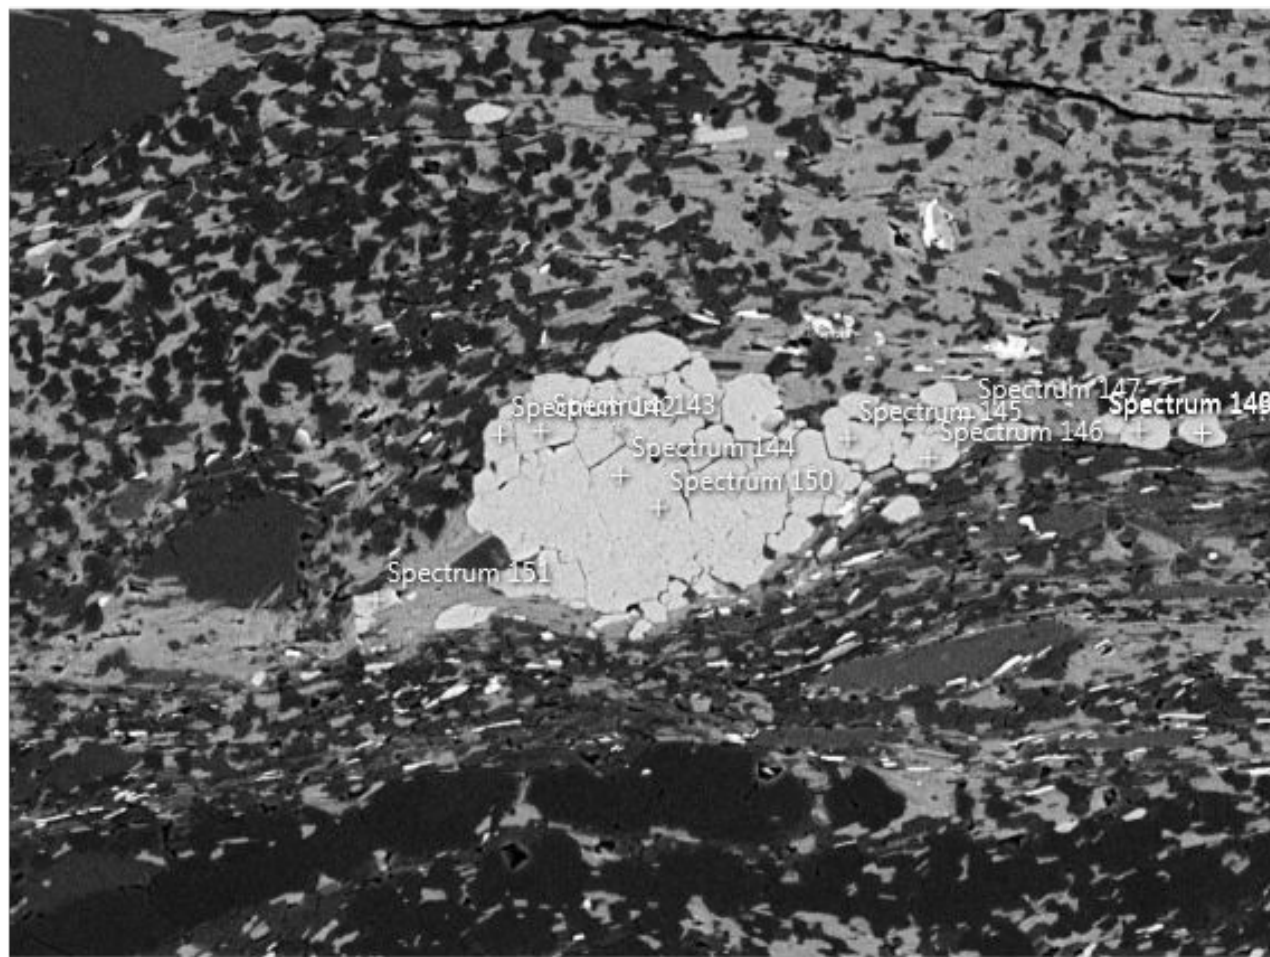

100μm

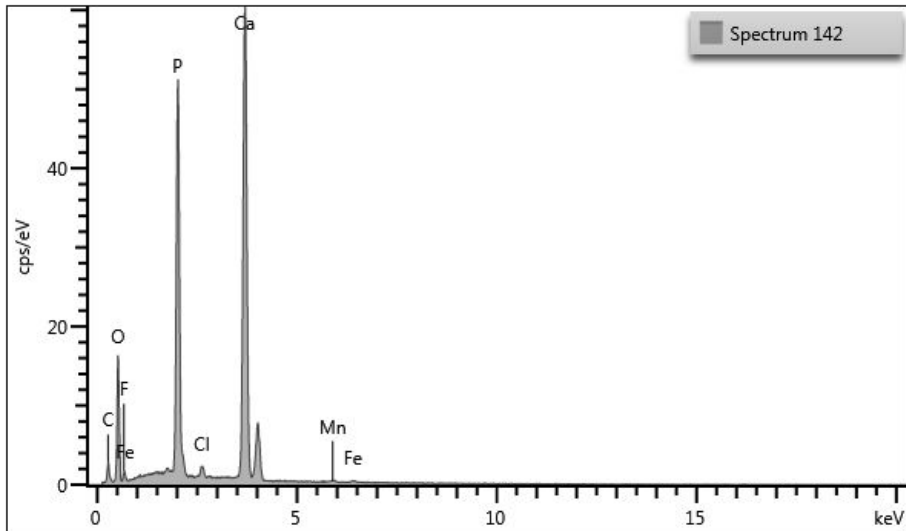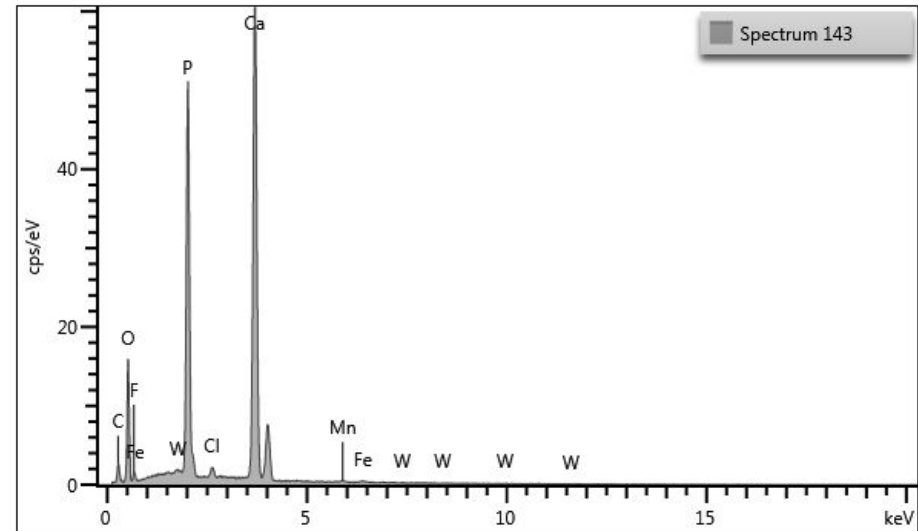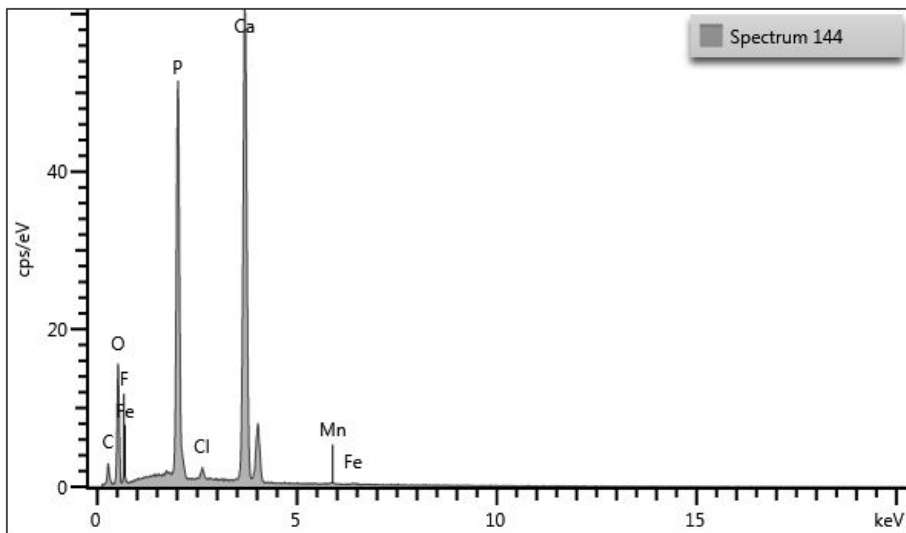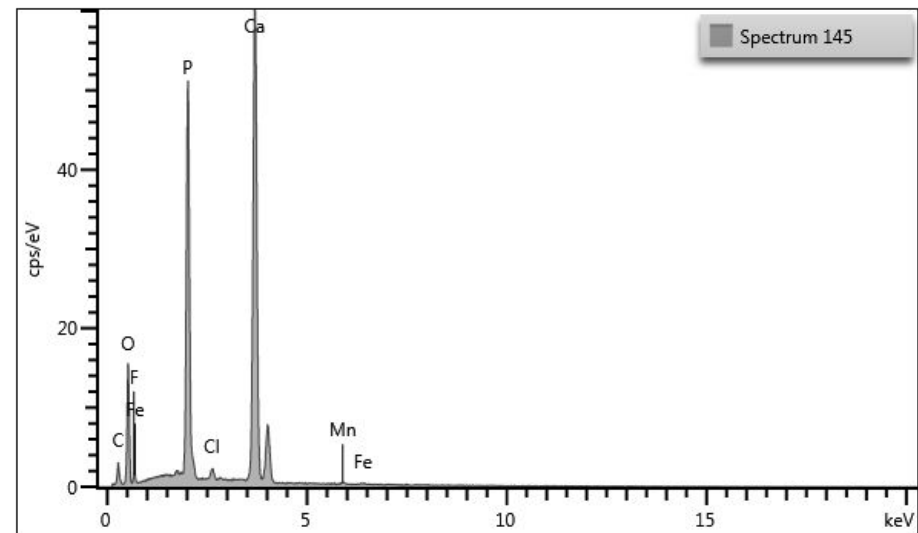

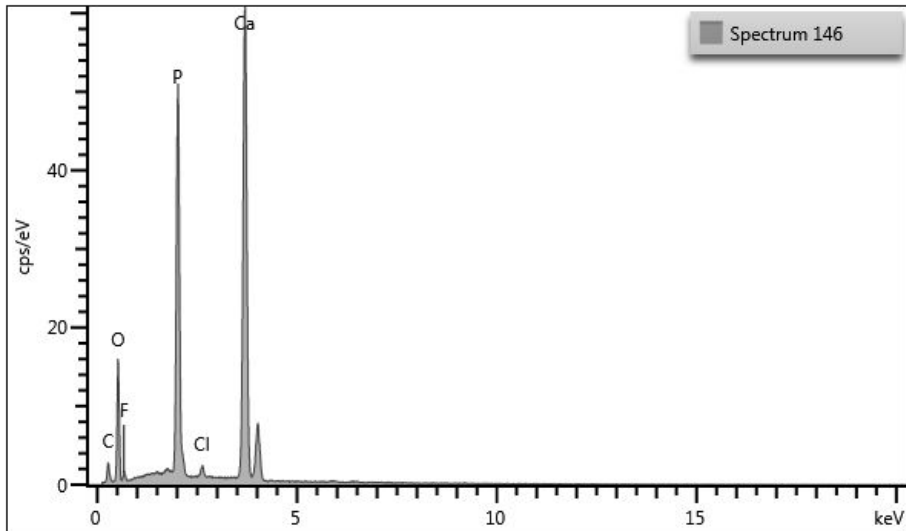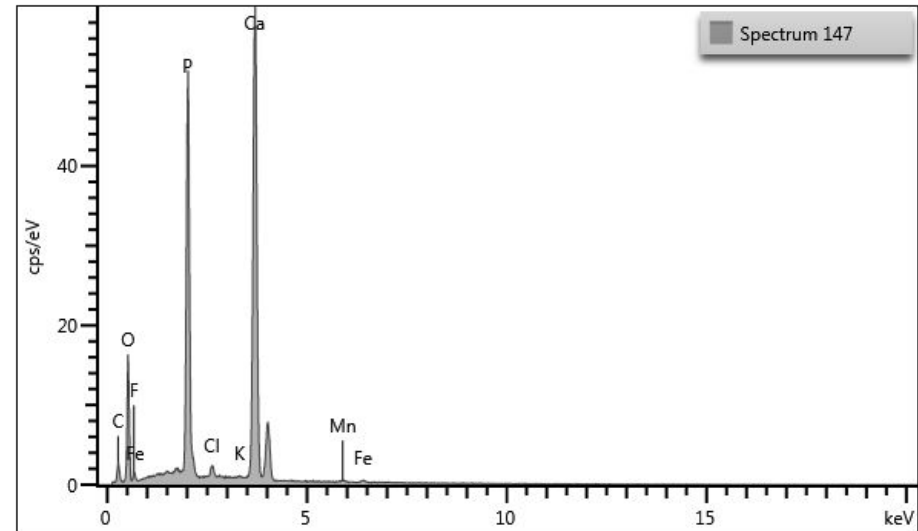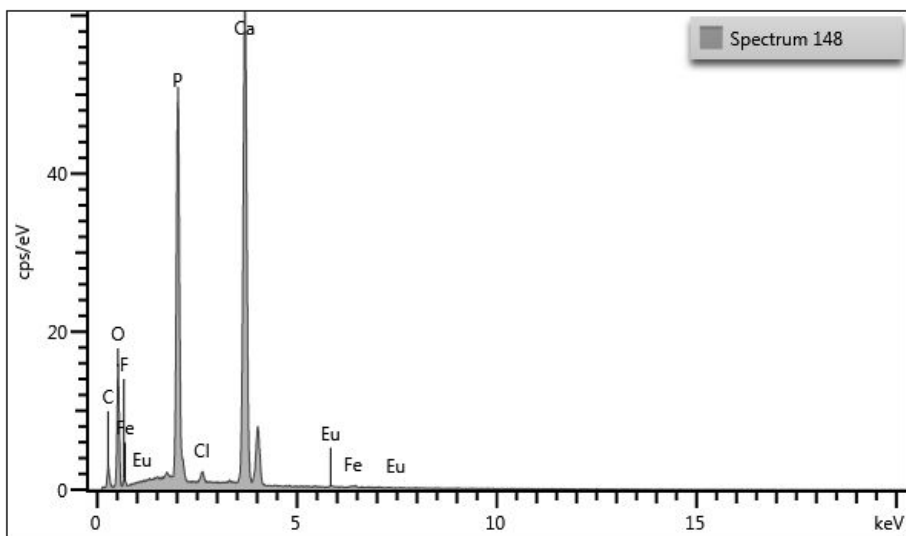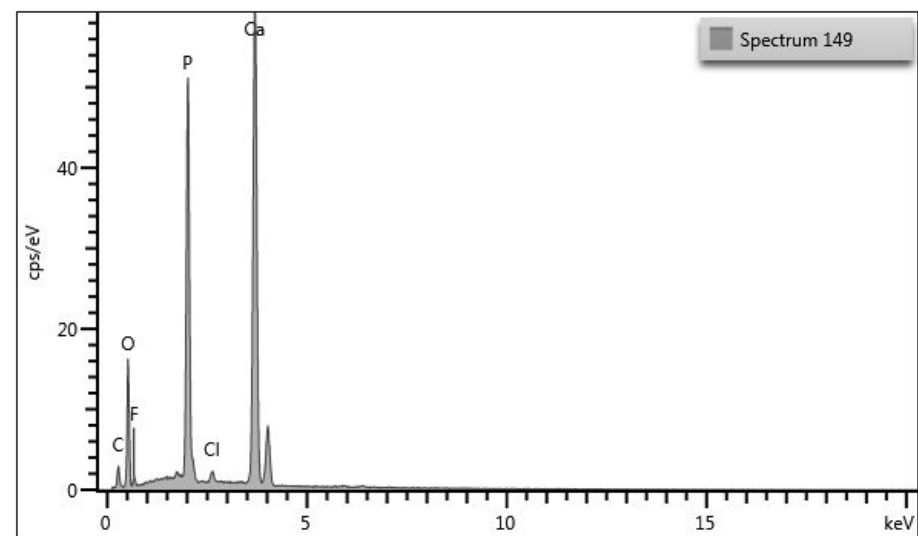

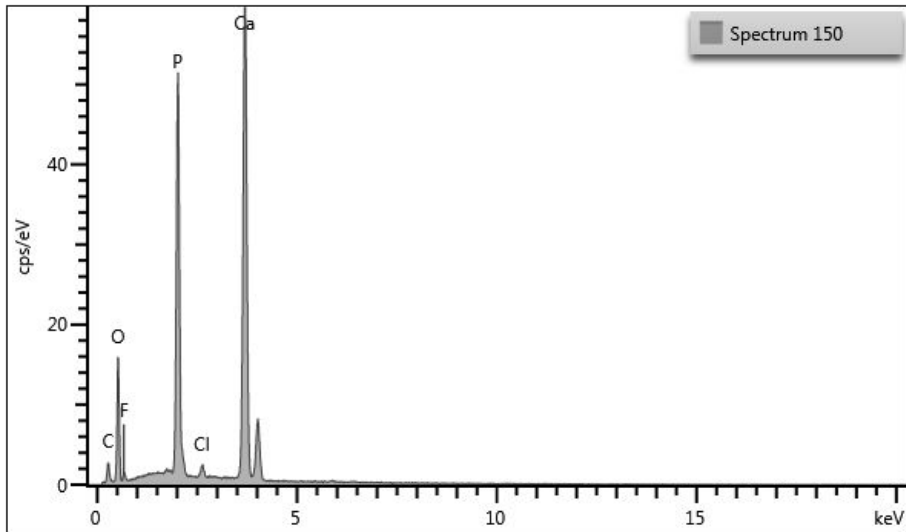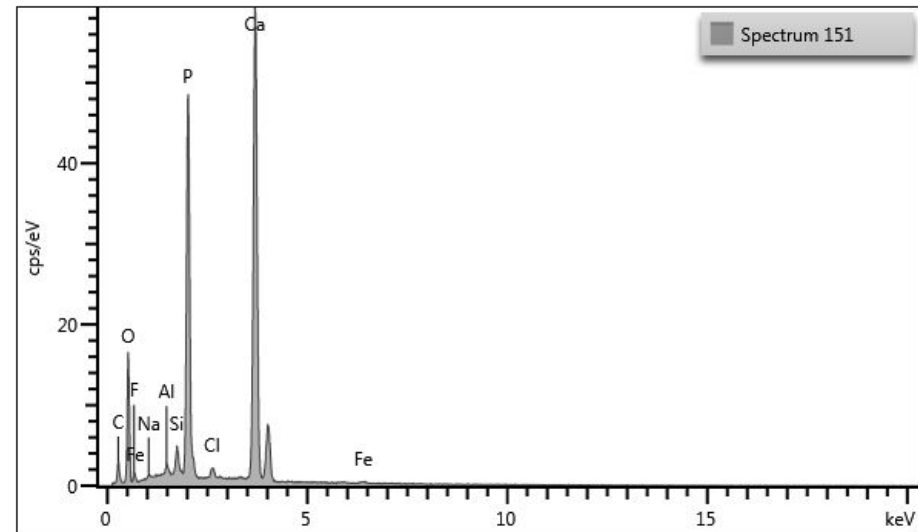



Electron Image 14

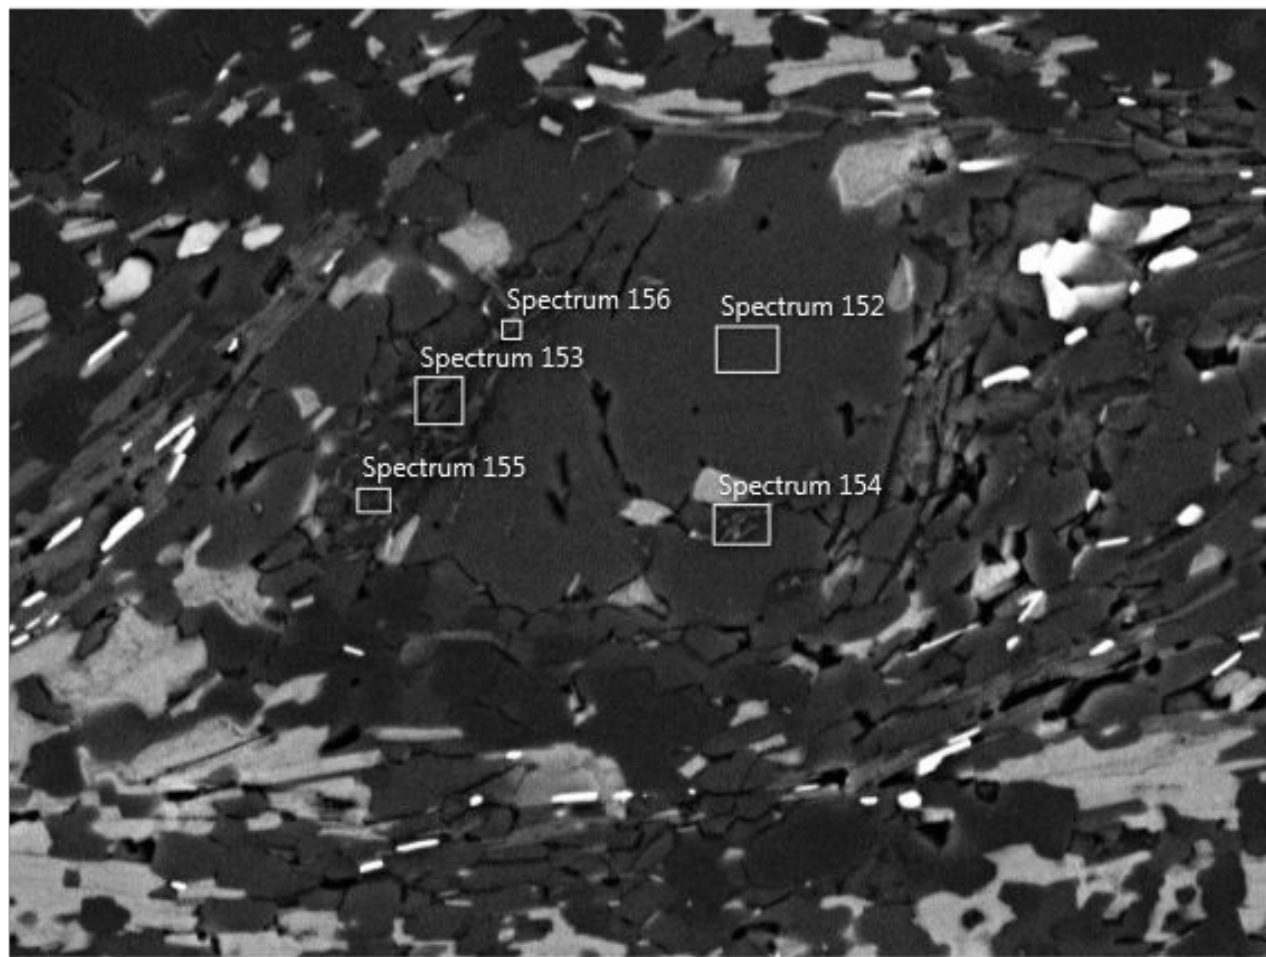

50μm

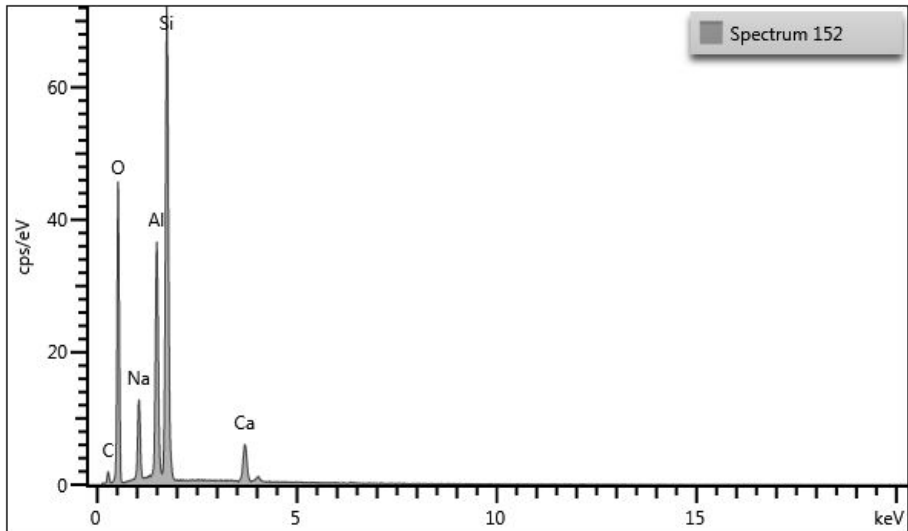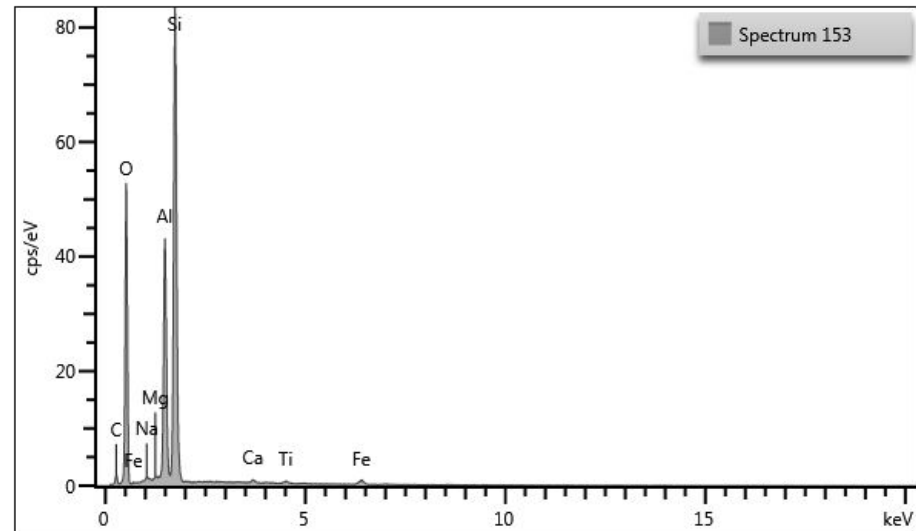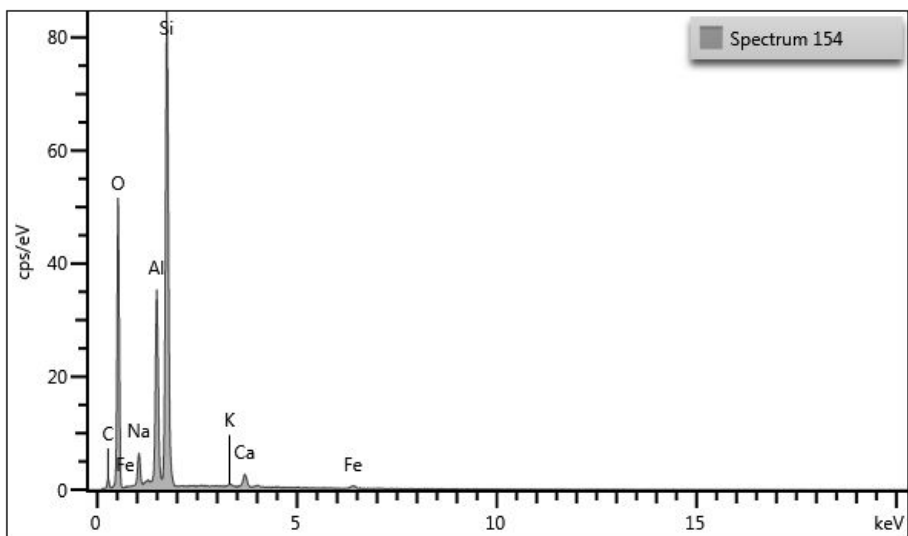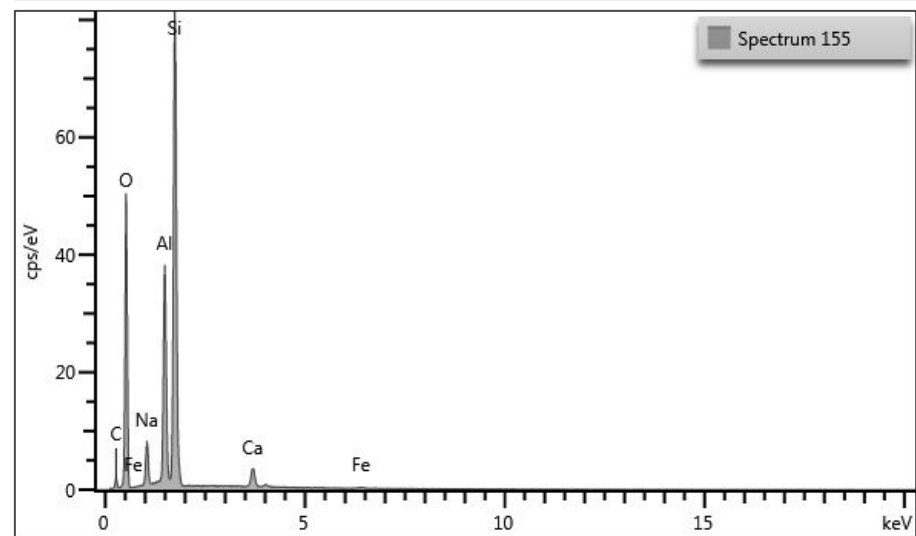

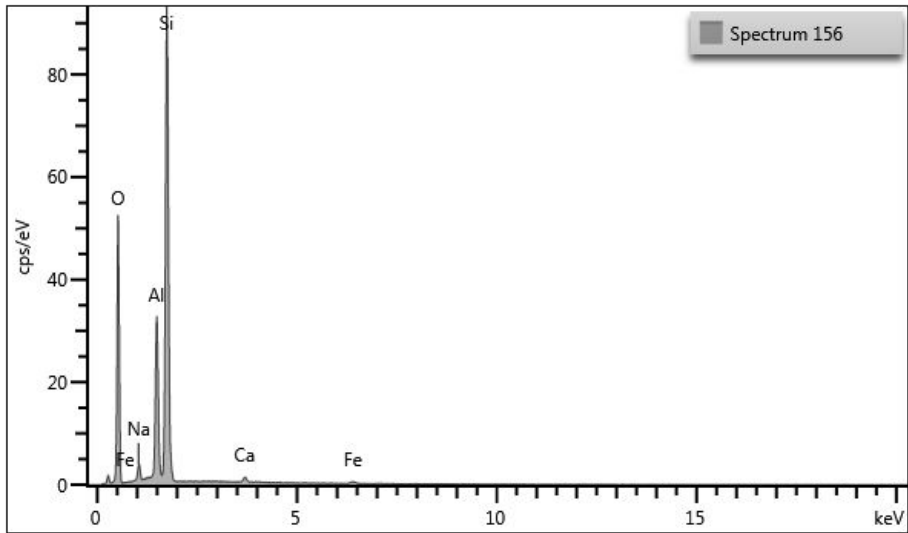

Electron Image 15

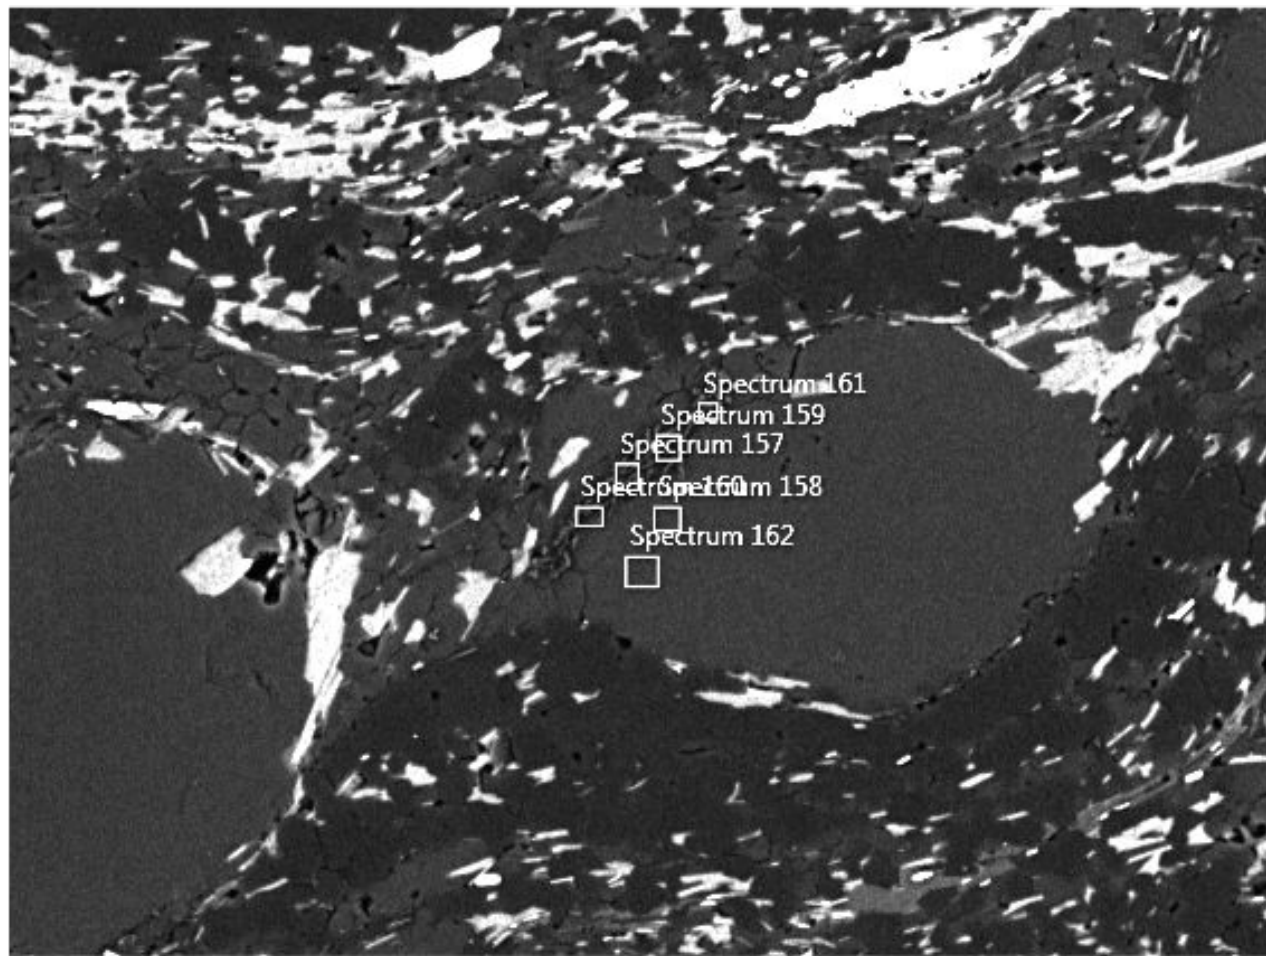

100μm

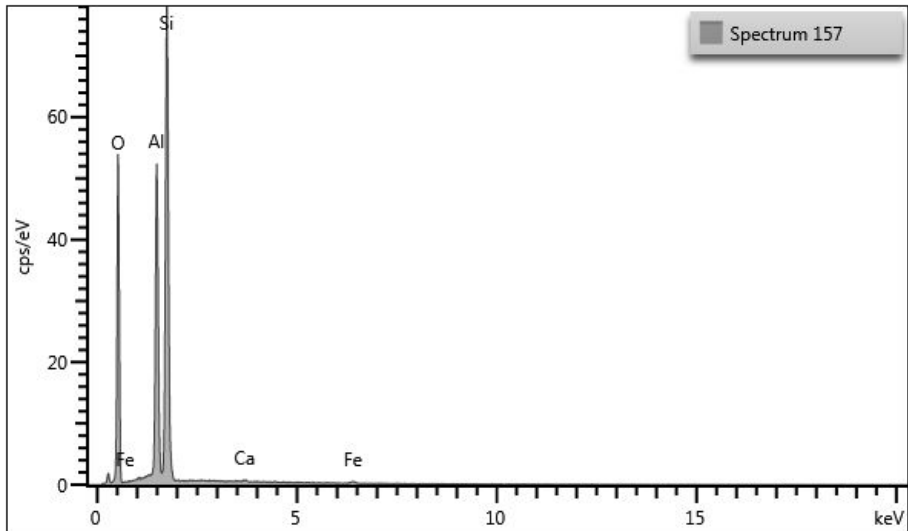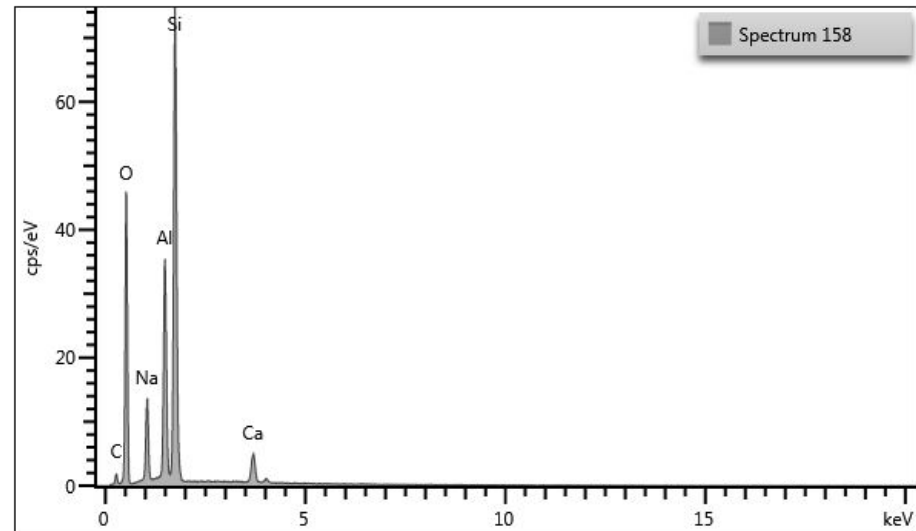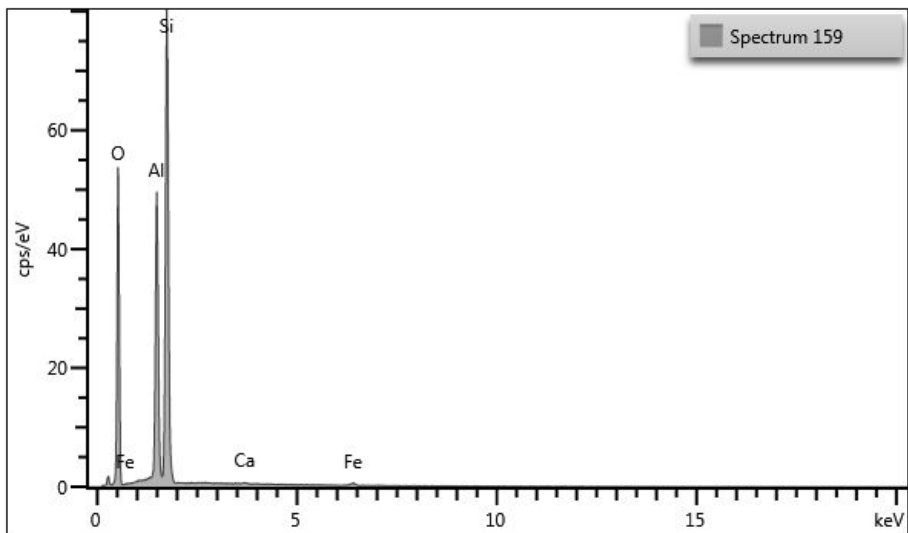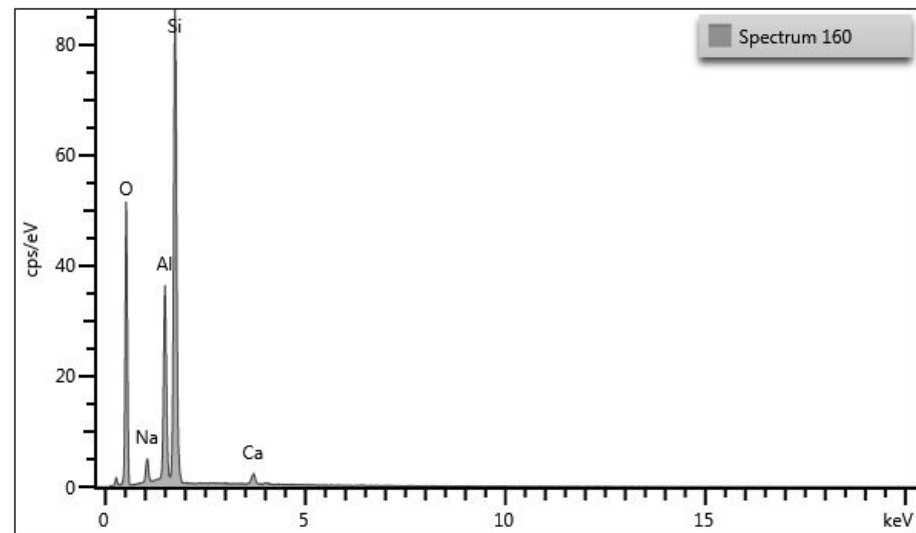

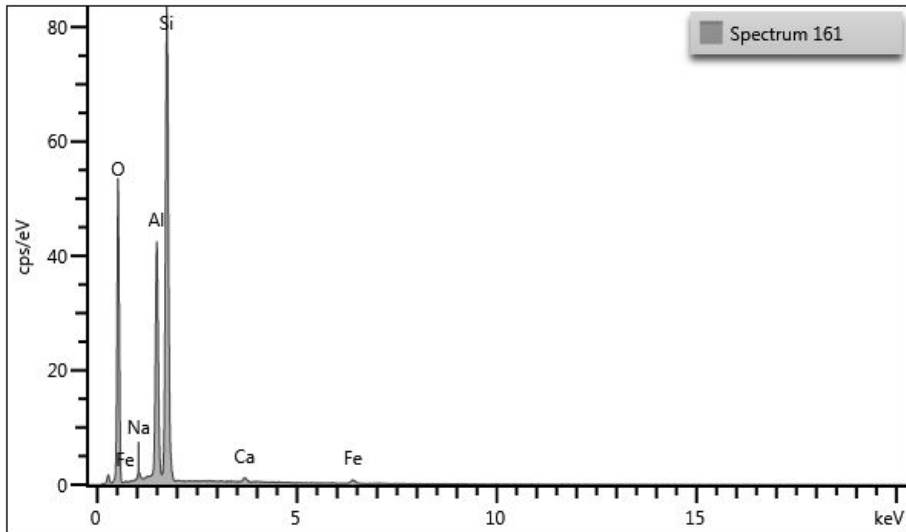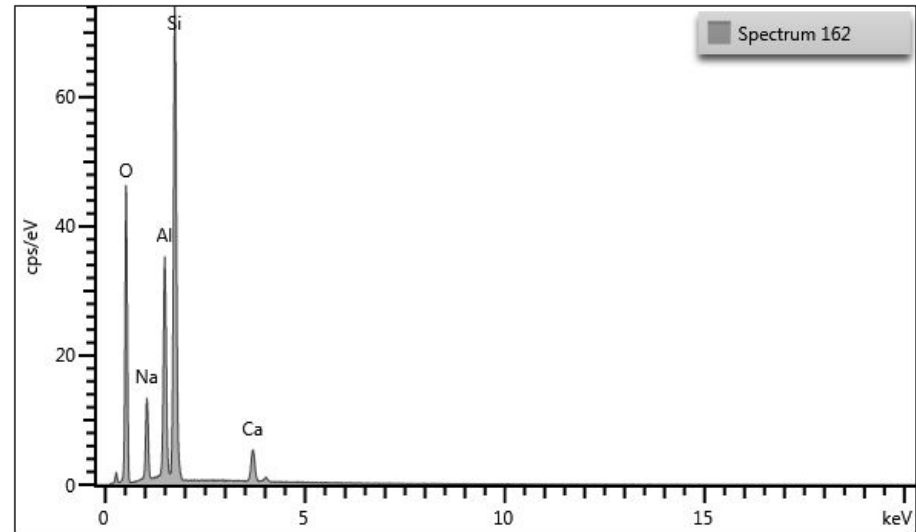

Electron Image 16

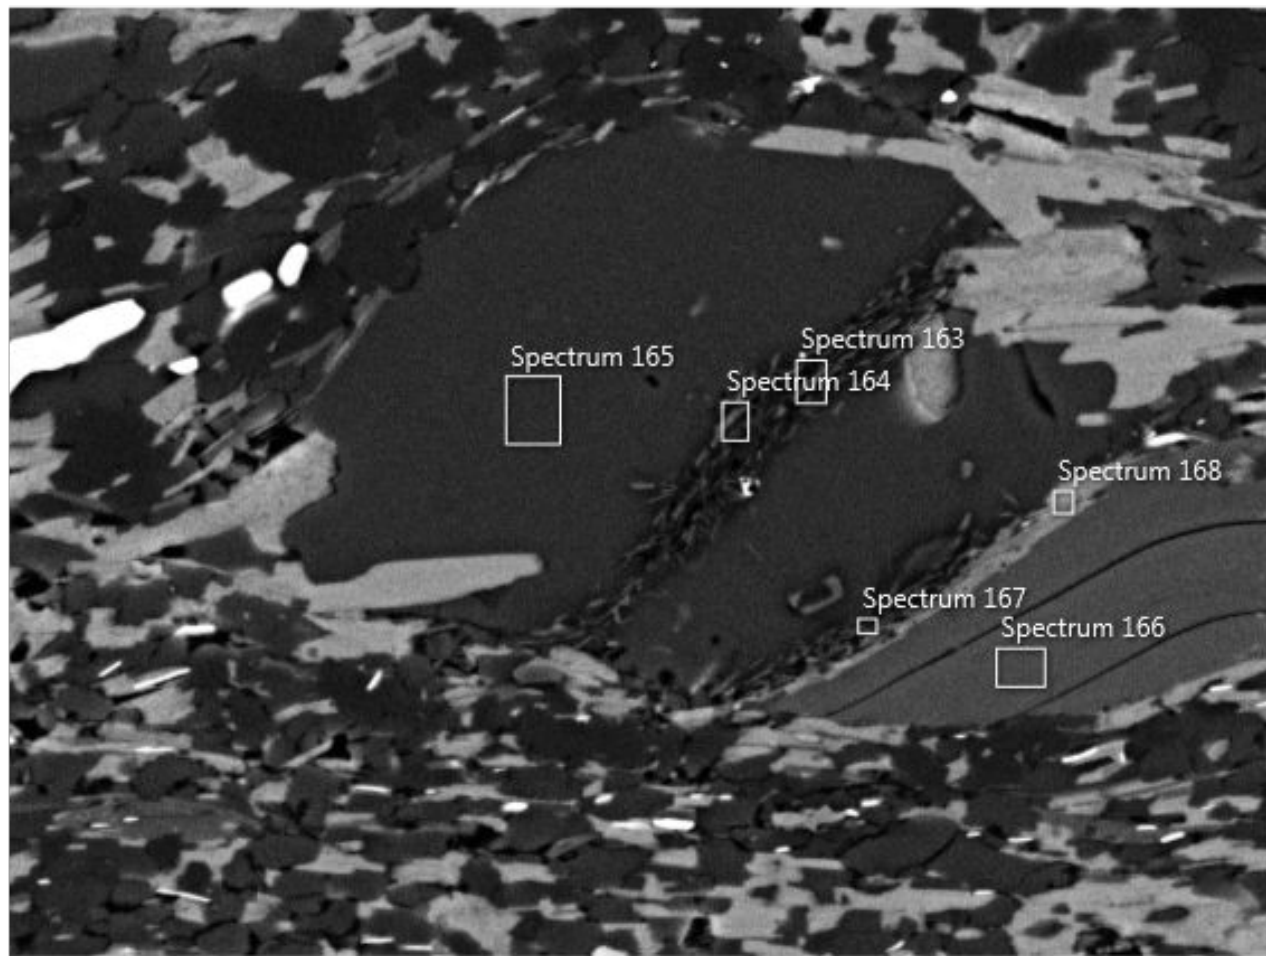

50μm

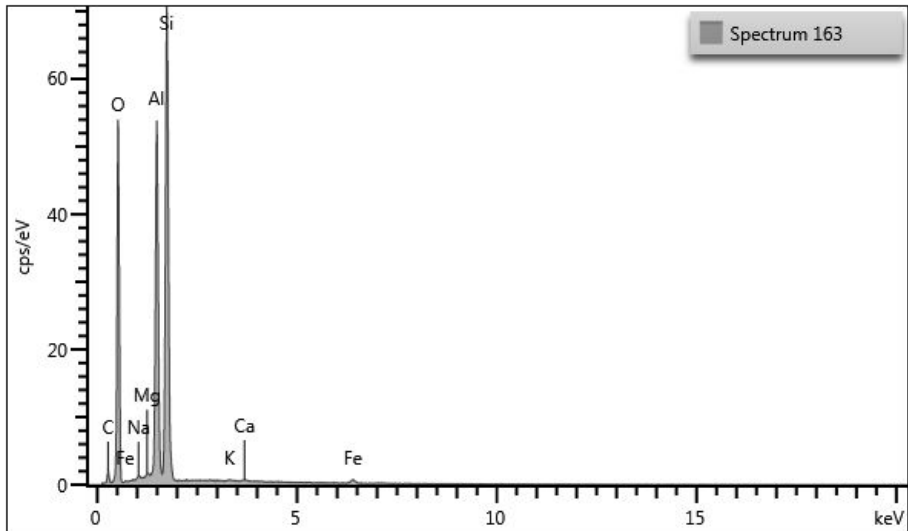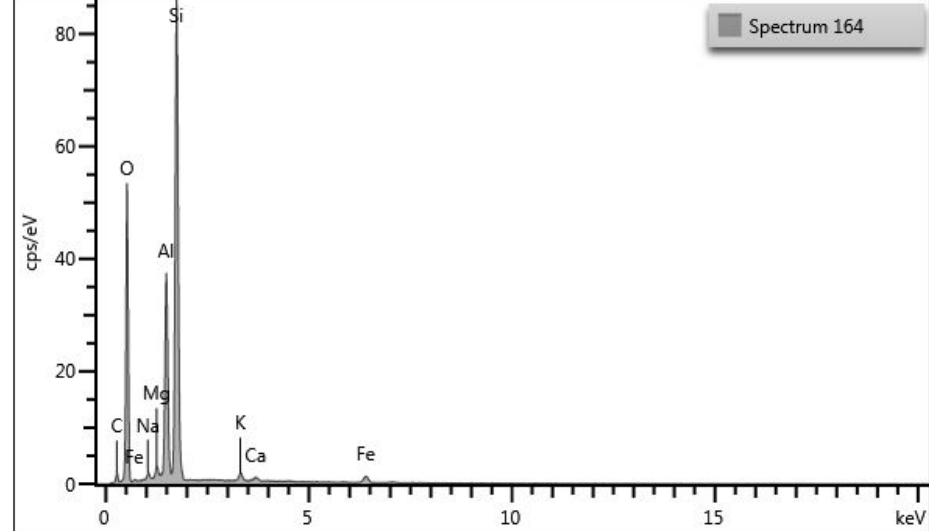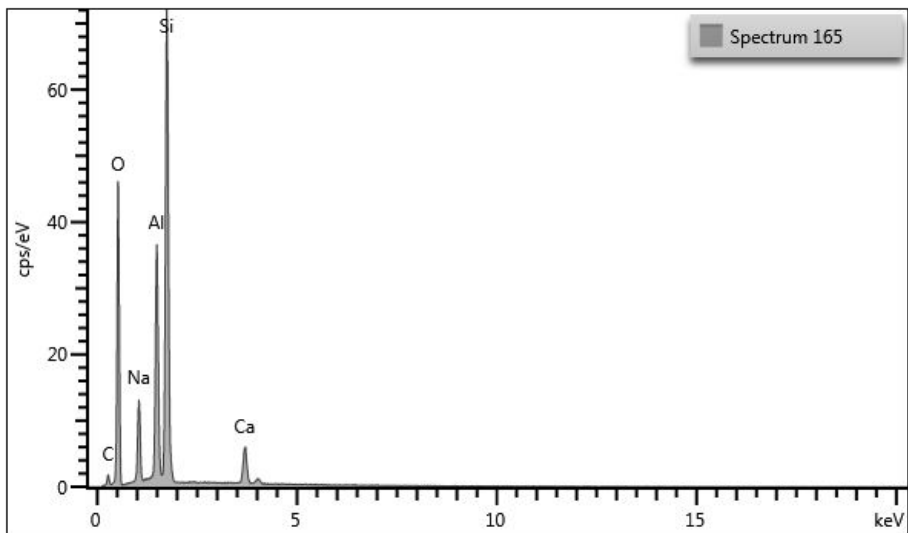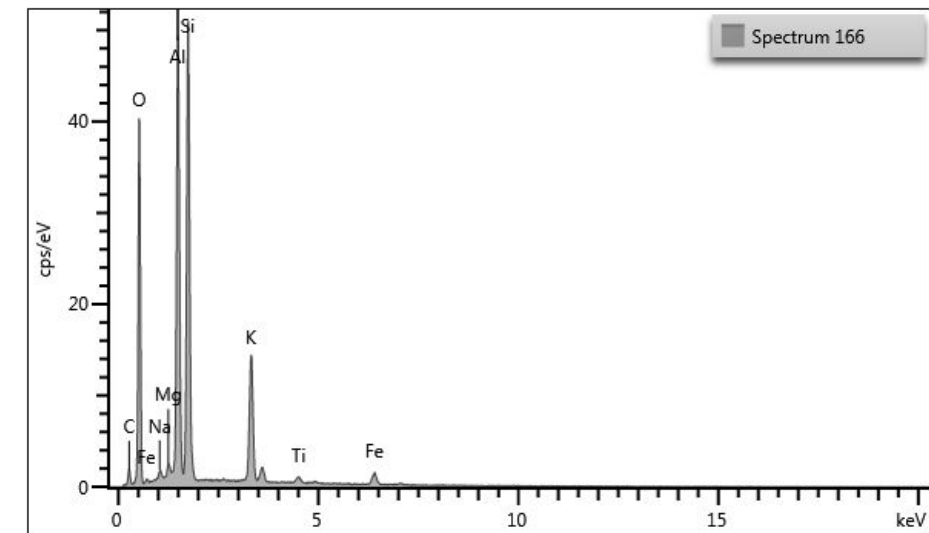



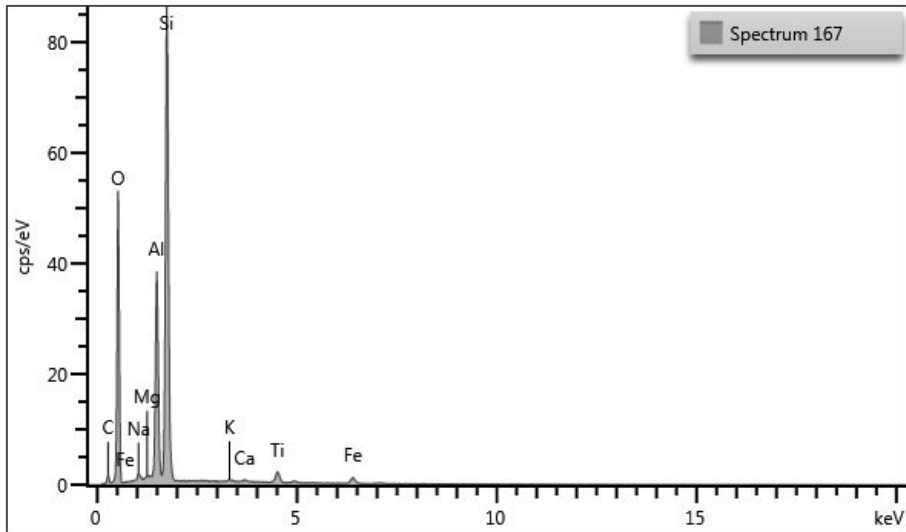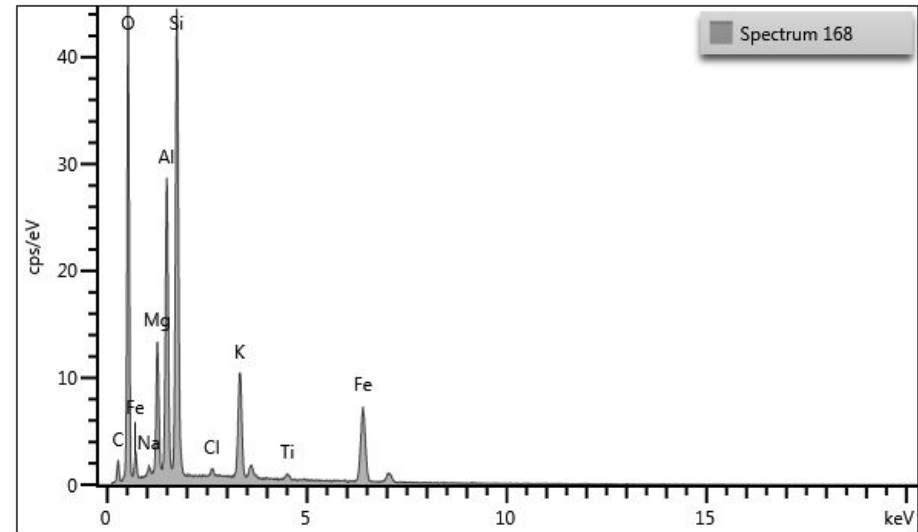

Supplement: Supplementary file 2 [file 1]
